# Supplementary material for: A synthetically benign one-pot construction of enamino-xanthene dyes
Source: Royal Society of Chemistry journal article supplement (doi:10.1039/d2ob01358d), 2022-01-01
Supplement: d2ob01358d1.pdf [file d2ob01358d1.pdf]

## Electronic Supplementary Information

### A synthetically benign one-pot construction of enamino-xanthene dyes

Juan Manuel Garrido-Zoido,\* Franklin Kajina, Esther Matamoros, M. Victoria Gil, Pedro Cintas and Juan C. Palacios\*

*Departamento de Química Orgánica e Inorgánica, Facultad de Ciencias and IACYS-Unidad de Química Verde y Desarrollo Sostenible, Universidad de Extremadura, E-06006 Badajoz, Spain.*

E-mail: jmgarridozoido@gmail.com, palacios@unex.es

#### INDEX

|                                                                         |     |
|-------------------------------------------------------------------------|-----|
| ENERGY DATA (TABLES AND FIGURES) . . . . .                              | S2  |
| MASS SPECTROMETRY . . . . .                                             | S4  |
| INFRARED SPECTROSCOPY . . . . .                                         | S9  |
| <sup>1</sup> H NMR, <sup>13</sup> C NMR AND DEPT SPECTRA . . . . .      | S16 |
| COSY, HSQC, HMBC SPECTRA AND VARIABLE-TEMPERATURE EXPERIMENTS . . . . . | S30 |
| CARTESIAN COORDINATES FOR OPTIMIZED STRUCTURES . . . . .                | S40 |

## ENERGY DATA (TABLES AND FIGURES)

**Table S1.** Energy barrier to interconversion of **21/22**.

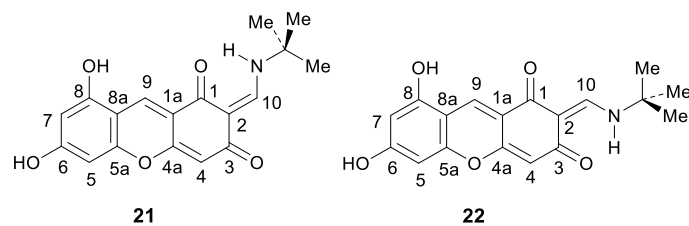

| Signal | Assignment | $\Delta\delta^a$ | $\Delta\vartheta^b$ | $T_c^c$ | $T_c^d$ | $\Delta G^{\ddagger e}$ |
|--------|------------|------------------|---------------------|---------|---------|-------------------------|
| NH     | Enamine    | 0,055            | 27,5                | 87      | 360     | 18,1                    |
| =CH    | C10        | 0,029            | 14,5                | 87      | 360     | 18,5                    |
| CH     | C9         | 0,020            | 10,0                | 77      | 350     | 18,2                    |
| CH     | C7         | 0,044            | 22,0                | 97      | 370     | 18,7                    |

<sup>a</sup> In ppm; <sup>b</sup> In Hz; <sup>c</sup> In °C; <sup>d</sup> In K; <sup>e</sup> In kcal·mol<sup>-1</sup> (1 cal = 4.184 J).

**Table S2.** Relative electronic energy, enthalpy, and Gibbs energy in gas phase.<sup>a</sup>

| Compound     | Enamine    |            |            | TS <sup>‡</sup>       |                       |                       |                            | Imine      |            |            |
|--------------|------------|------------|------------|-----------------------|-----------------------|-----------------------|----------------------------|------------|------------|------------|
|              | $\Delta E$ | $\Delta H$ | $\Delta G$ | $\Delta E^{\ddagger}$ | $\Delta H^{\ddagger}$ | $\Delta G^{\ddagger}$ | $\tilde{\nu}^{\ddagger b}$ | $\Delta E$ | $\Delta H$ | $\Delta G$ |
| <b>21/49</b> | 0.0        | 0.0        | 0.6        | 7.3                   | 3.7                   | 4.6                   | -1074.6                    | 5.9        | 5.2        | 6.4        |
| <b>22/50</b> | 0.0        | 0.0        | 0.0        | 6.4                   | 3.1                   | 4.4                   | -1025.5                    | 5.3        | 4.4        | 5.3        |

<sup>a</sup> In kcal·mol<sup>-1</sup>, <sup>b</sup> In cm<sup>-1</sup>.

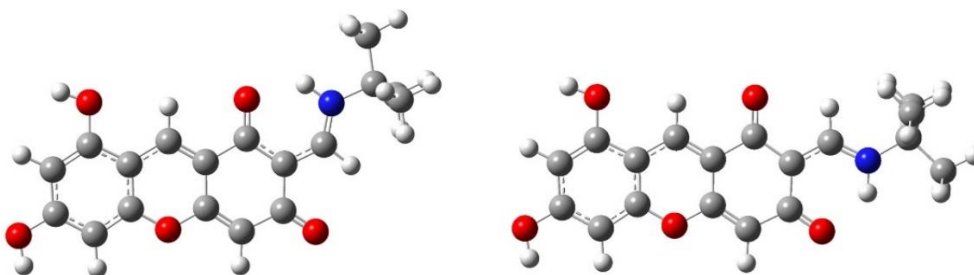

**Figure S1.** Optimized structures of ketoenamines **21** and **22** in the gas phase.

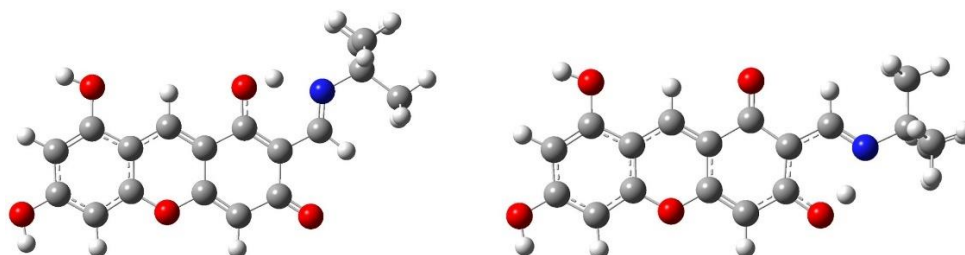

**Figure S2.** Optimized structures of phenolimines **49** and **50** in the gas phase.

**Table S3.** Relative electronic energy, enthalpy, and Gibbs energy in DMSO.<sup>a</sup>

| Compound     | Enamine    |            |            | TS <sup>‡</sup>       |                       |                       |                            | Imine      |            |            |
|--------------|------------|------------|------------|-----------------------|-----------------------|-----------------------|----------------------------|------------|------------|------------|
|              | $\Delta E$ | $\Delta H$ | $\Delta G$ | $\Delta E^{\ddagger}$ | $\Delta H^{\ddagger}$ | $\Delta G^{\ddagger}$ | $\tilde{\nu}^{\ddagger b}$ | $\Delta E$ | $\Delta H$ | $\Delta G$ |
| <b>21/49</b> | 0.0        | 0.0        | 0.6        | 8.8                   | 5.1                   | 6.0                   | -896.9                     | 8.3        | 7.1        | 8.0        |
| <b>22/50</b> | 0.3        | 0.3        | 0.0        | 8.3                   | 4.9                   | 5.9                   | -861.4                     | 7.9        | 6.6        | 7.5        |

<sup>a</sup> In kcal·mol<sup>-1</sup>, <sup>b</sup> In cm<sup>-1</sup>.**Table S4.** Relative electronic energy, enthalpy, and Gibbs energy in DMSO, ethanol and water.<sup>a</sup>

| Compound  | DMSO       |            |            | Ethanol    |            |            | Water      |            |            |
|-----------|------------|------------|------------|------------|------------|------------|------------|------------|------------|
|           | $\Delta E$ | $\Delta H$ | $\Delta G$ | $\Delta E$ | $\Delta H$ | $\Delta G$ | $\Delta E$ | $\Delta H$ | $\Delta G$ |
| <b>21</b> | 0.0        | 0.0        | 0.6        | 0.0        | 0.0        | 0.3        | 0.0        | 0.0        | 0.0        |
| <b>49</b> | 8.3        | 7.1        | 8.0        | 9.1        | 7.6        | 8.6        | 9.8        | 8.2        | 8.8        |
| <b>50</b> | 7.9        | 6.6        | 7.5        | 8.8        | 7.3        | 8.5        | 9.5        | 8.1        | 8.6        |
| <b>22</b> | 0.3        | 0.3        | 0.0        | 0.3        | 0.0        | 0.0        | 0.5        | 0.2        | 0.0        |

<sup>a</sup> In kcal·mol<sup>-1</sup>.

## MASS SPECTROMETRY

Note: Signals around  $m/z$  157.0357 correspond to dimethylsulfoxide  $[M_2+H]^+$ , used as solvent.

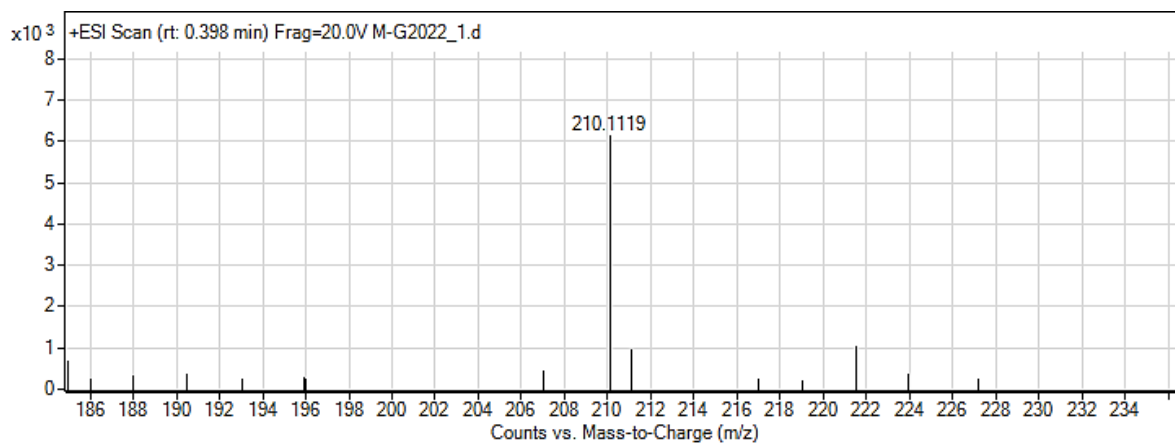

**Figure S3.** LC-MS of **18** -  $C_{11}H_{15}NO_3$   $[M+H]^+$   $m/z$  calcd. 210.1125.

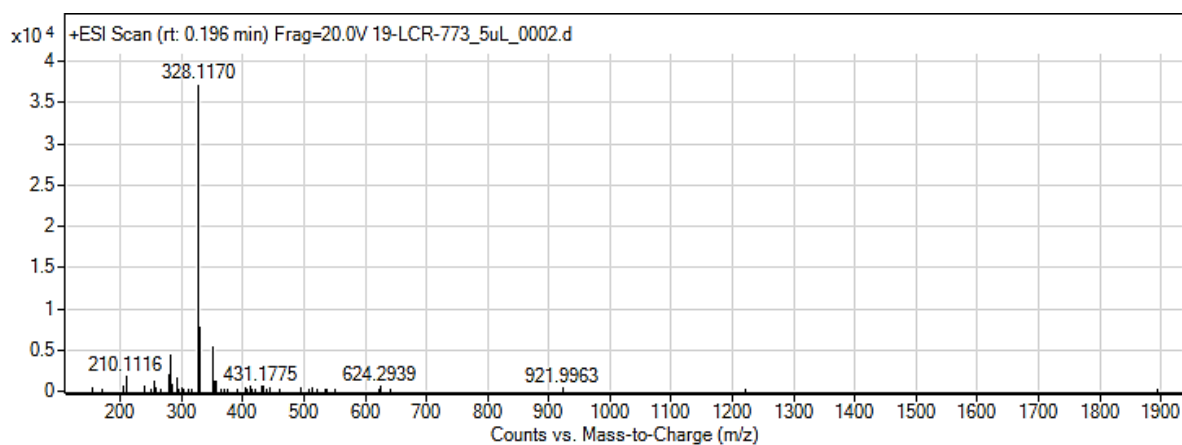

**Figure S4.** LC-MS of **19** -  $C_{18}H_{17}NO_5$   $[M+H]^+$   $m/z$  calcd. 328.1180.

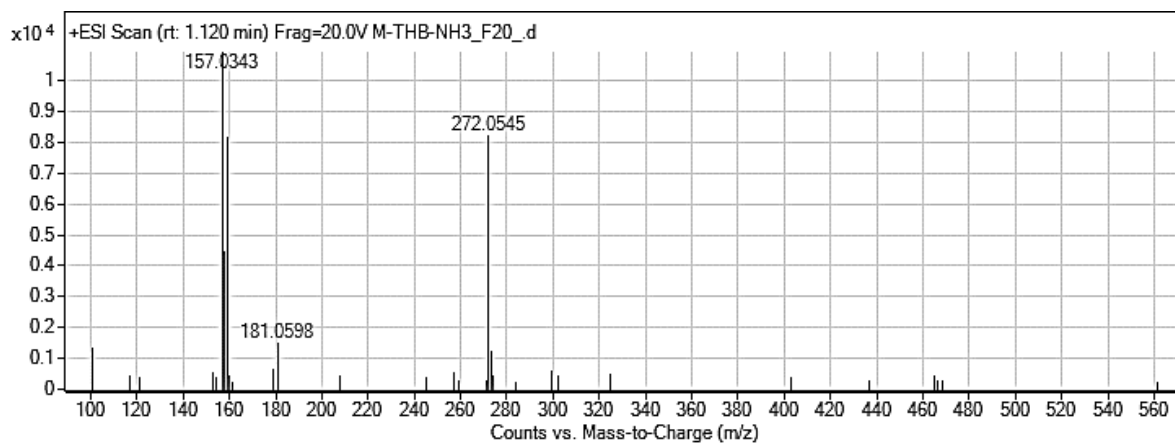

**Figure S5.** LC-MS of **23** -  $C_{14}H_9NO_5$   $[M+H]^+$   $m/z$  calcd. 272.0554.

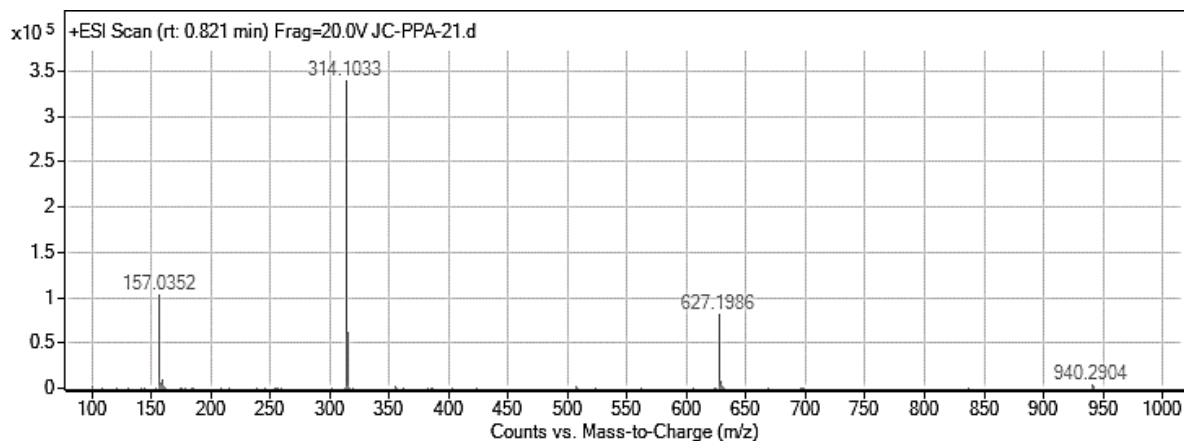

**Figure S6.** LC-MS of **24** - C<sub>17</sub>H<sub>15</sub>NO<sub>5</sub> [M+H]<sup>+</sup> m/z calcd. 314.1023; [M<sub>2</sub>+H]<sup>+</sup> m/z calcd. 627.1973; [M<sub>3</sub>+H]<sup>+</sup> m/z calcd. 940.2923.

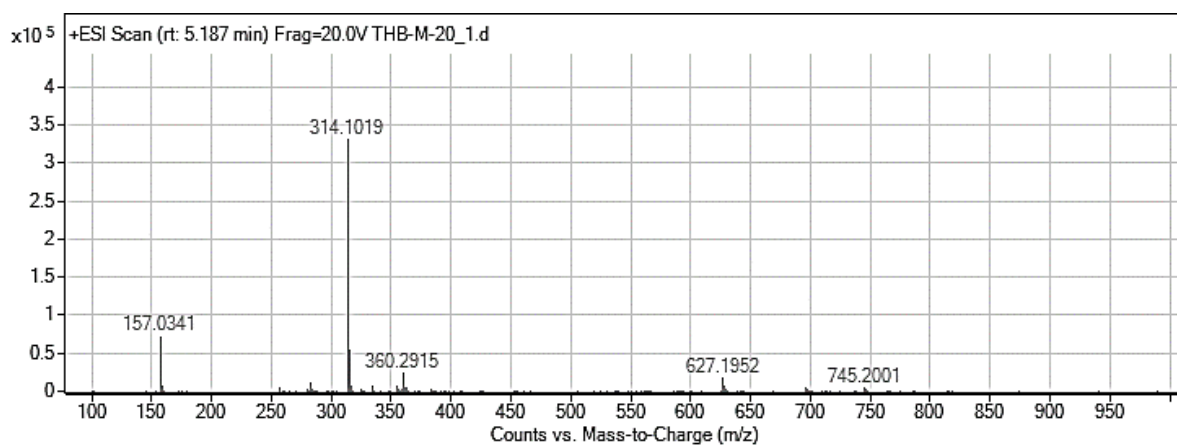

**Figure S7.** LC-MS of **25** C<sub>17</sub>H<sub>15</sub>NO<sub>5</sub> [M+H]<sup>+</sup> m/z calcd. 314.1023; [M<sub>2</sub>+H]<sup>+</sup> m/z calcd. 627.1973.

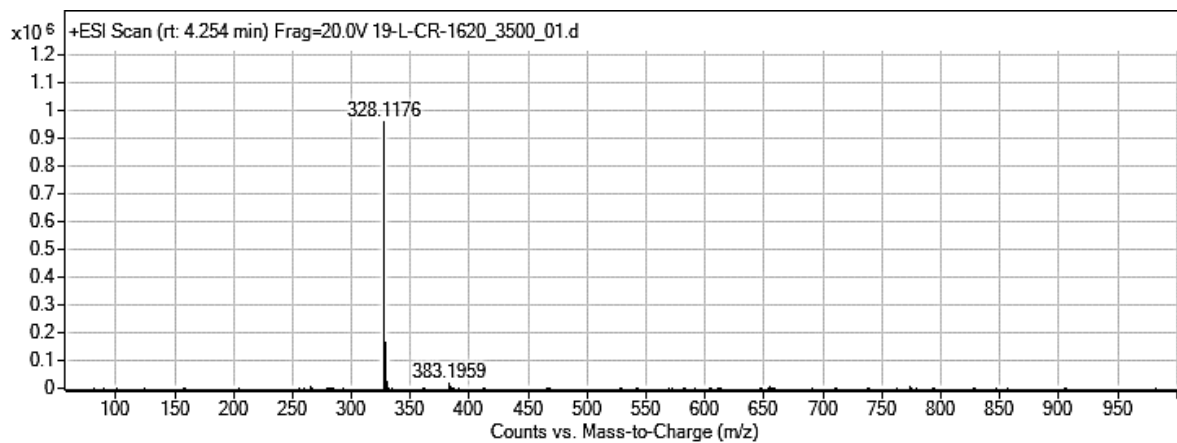

**Figure S8.** LC-MS of **26** - C<sub>18</sub>H<sub>17</sub>NO<sub>5</sub> [M+H]<sup>+</sup> m/z calcd. 328.1180.

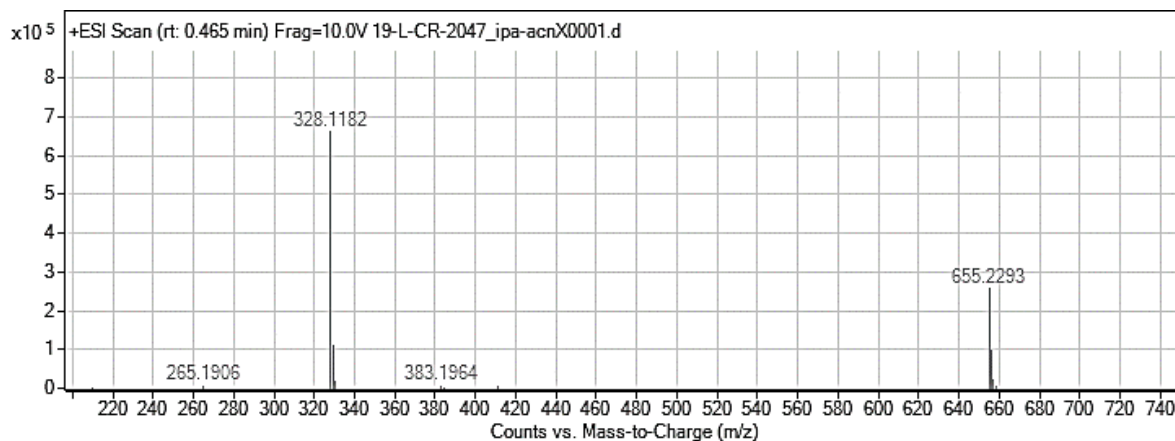

**Figure S9.** LC-MS of **27** -  $C_{18}H_{17}NO_5$   $[M+H]^+$  m/z calcd. 328.1180;  $[M_2+H]^+$  m/z calcd. 655.2286.

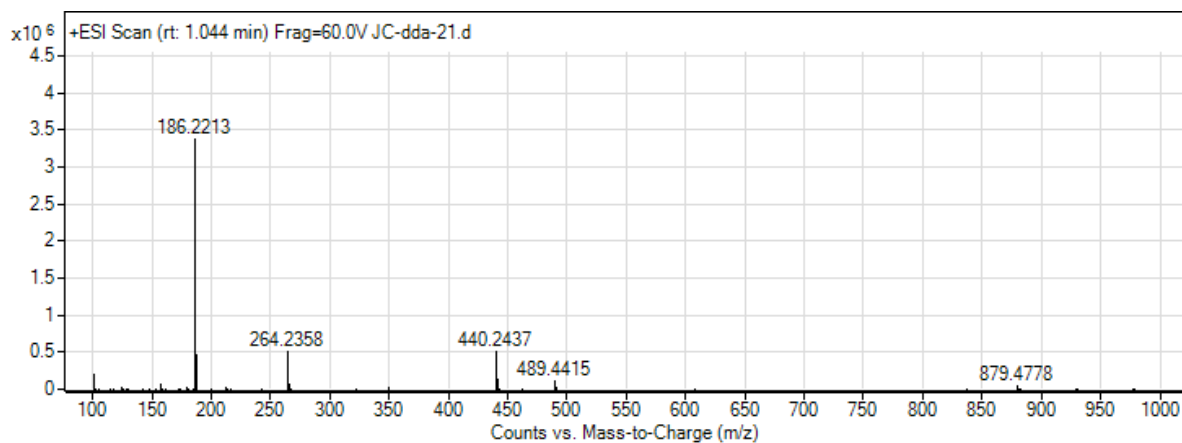

**Figure S10.** LC-MS of **28** -  $C_{26}H_{33}NO_5$   $[M+H]^+$  m/z calcd. 440.2432;  $[M_2+H]^+$  m/z calcd. 879.4790.

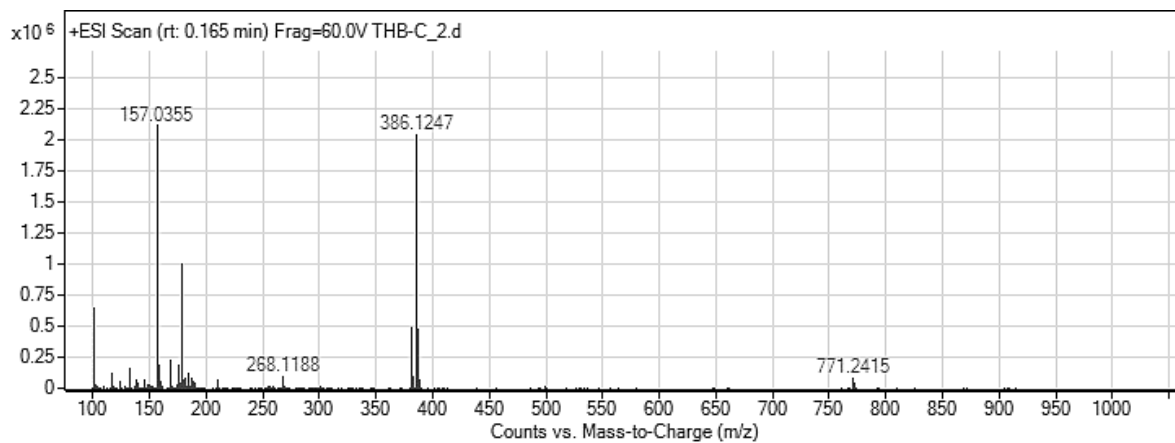

**Figure S11.** LC-MS of **29** -  $C_{20}H_{19}NO_7$   $[M+H]^+$  m/z calcd. 386.1234;  $[M_2+H]^+$  m/z calcd. 771.2401.

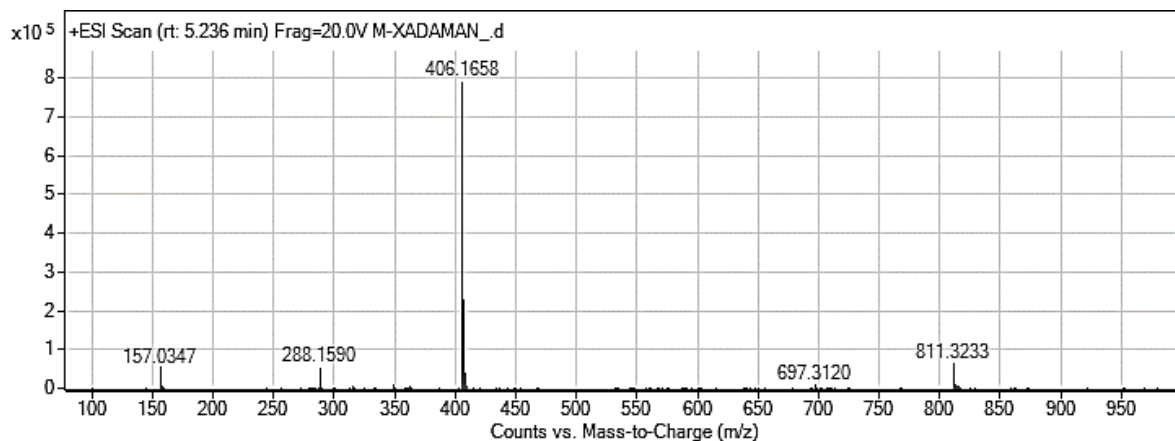

**Figure S12.** LC-MS of **30** -  $C_{24}H_{23}NO_5$   $[M+H]^+$  m/z calcd. 406.1649;  $[M_2+H]^+$  m/z calcd. 811.3225.

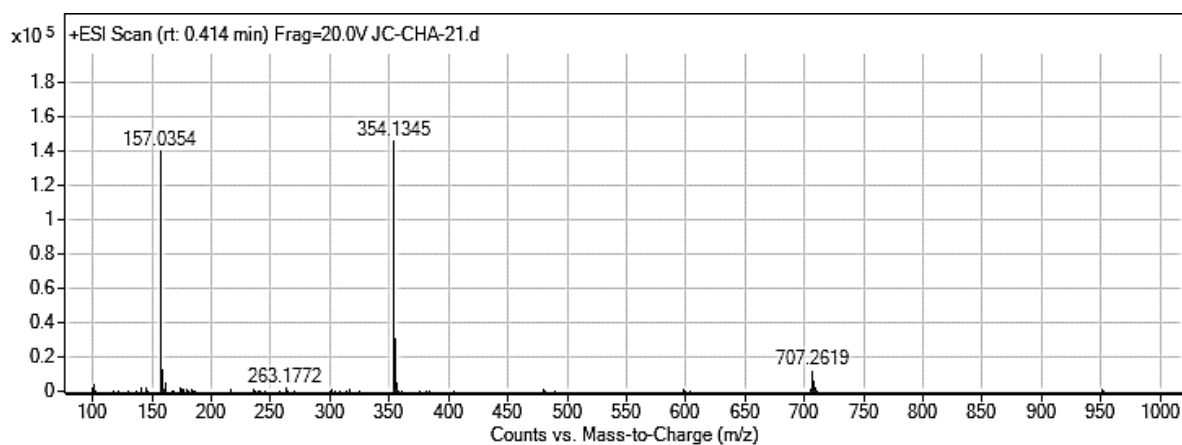

**Figure S13.** LC-MS of **31** -  $C_{20}H_{19}NO_5$   $[M+H]^+$  m/z calcd. 354.1336;  $[M_2+H]^+$  m/z calcd. 707.2599.

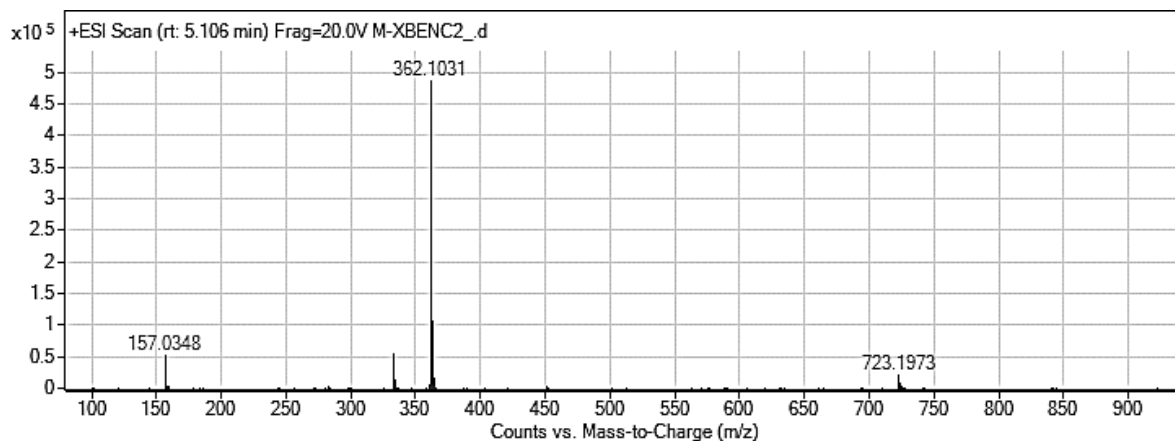

**Figure S14.** LC-MS of **32** -  $C_{21}H_{15}NO_5$   $[M+H]^+$  m/z calcd. 362.1023;  $[M_2+H]^+$  m/z calcd. 723.1973.

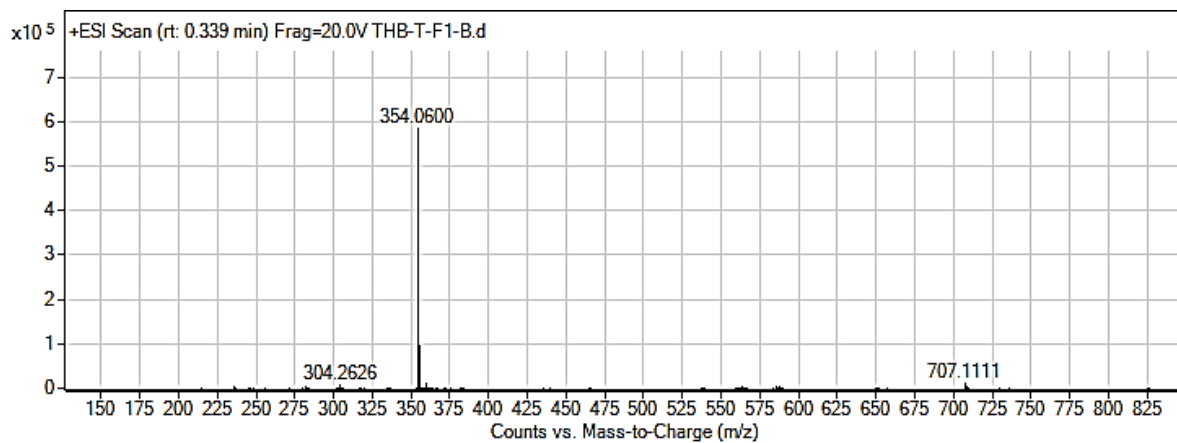

**Figure S15.** LC-MS of **33** -  $C_{16}H_{10}F_3NO_5$   $[M+H]^+$  m/z calcd. 354.0584;  $[M_2+H]^+$  m/z calcd. 707.1095.

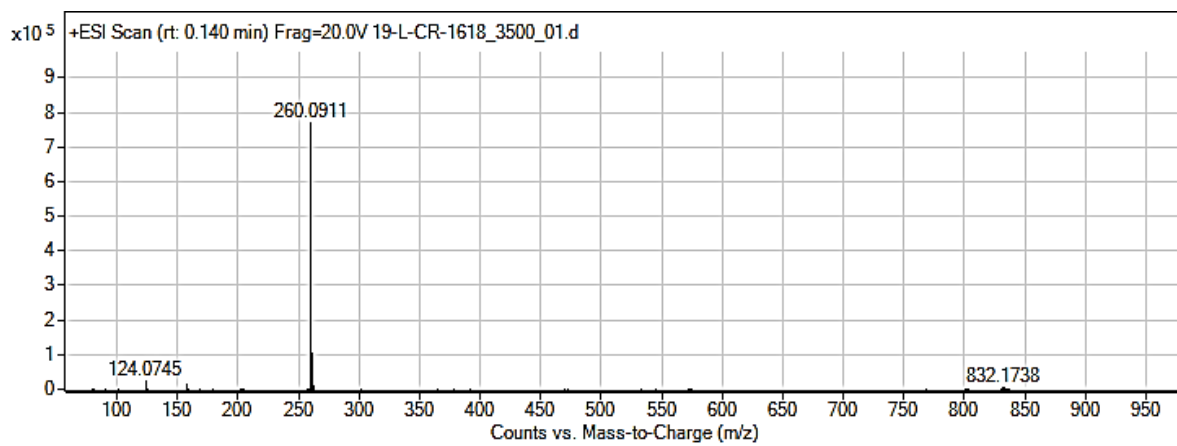

**Figure S16.** LC-MS of **51** -  $C_{14}H_{13}NO_4$   $[M+H]^+$  m/z calcd. 260.0917.



## INFRARED SPECTROSCOPY

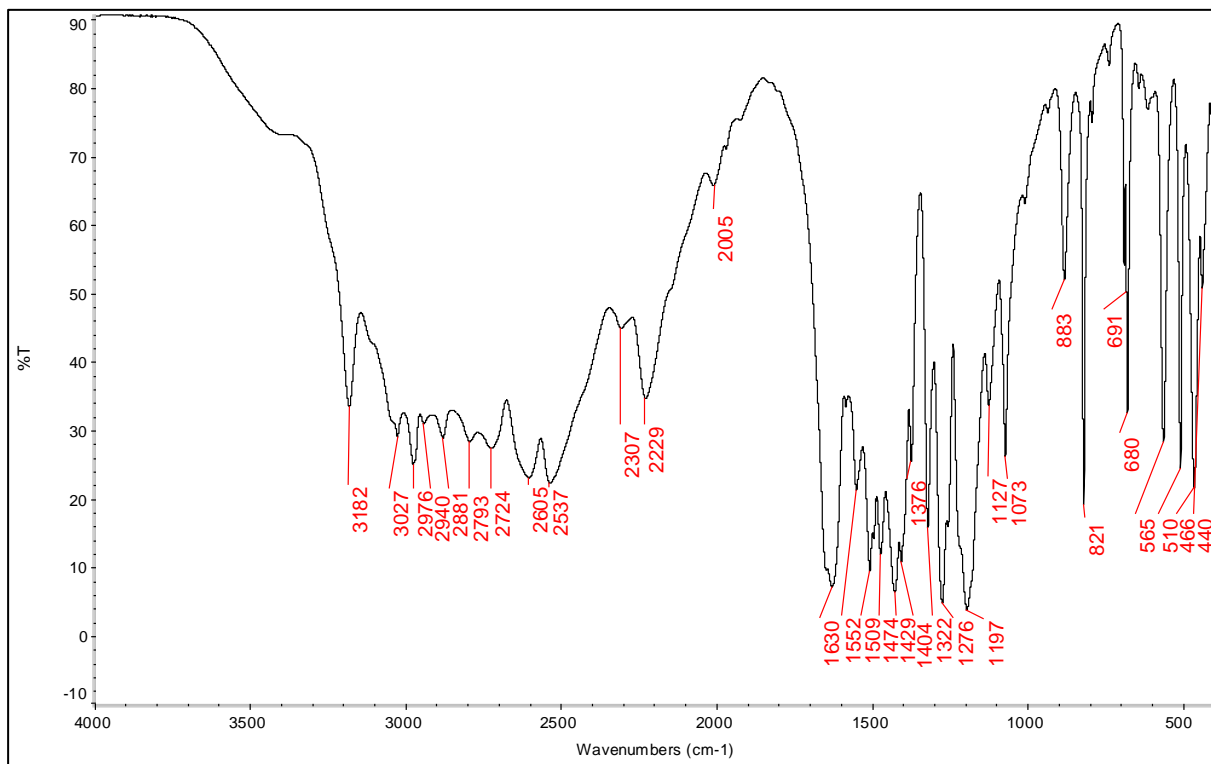

Figure S17. FTIR spectrum of 18.

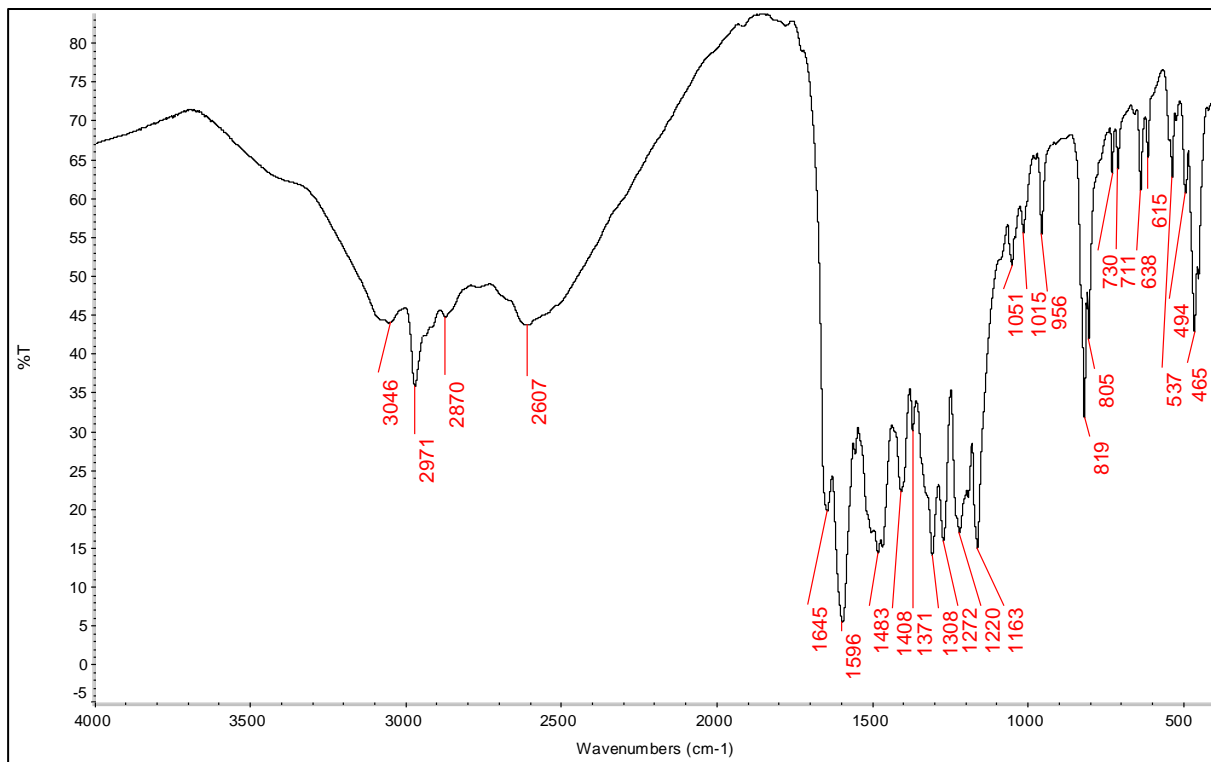

Figure S18. FTIR spectrum of 19.

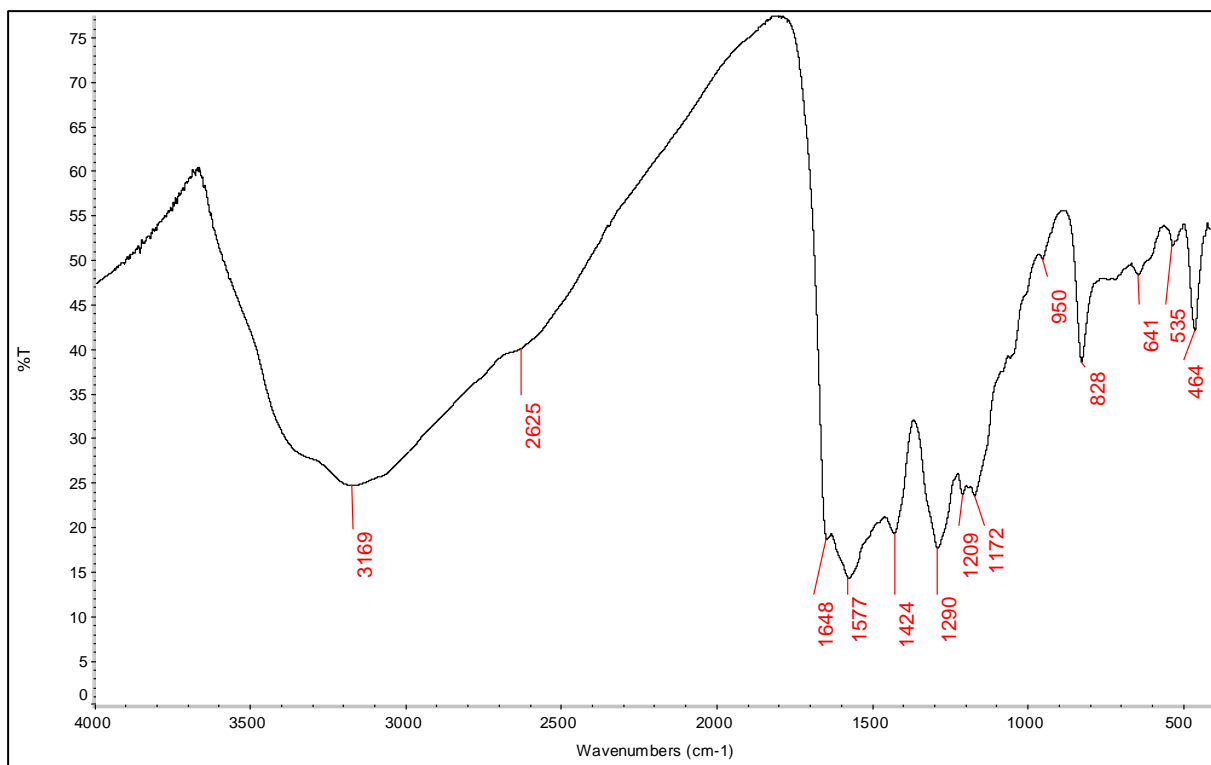

Figure S19. FTIR spectrum of 23.

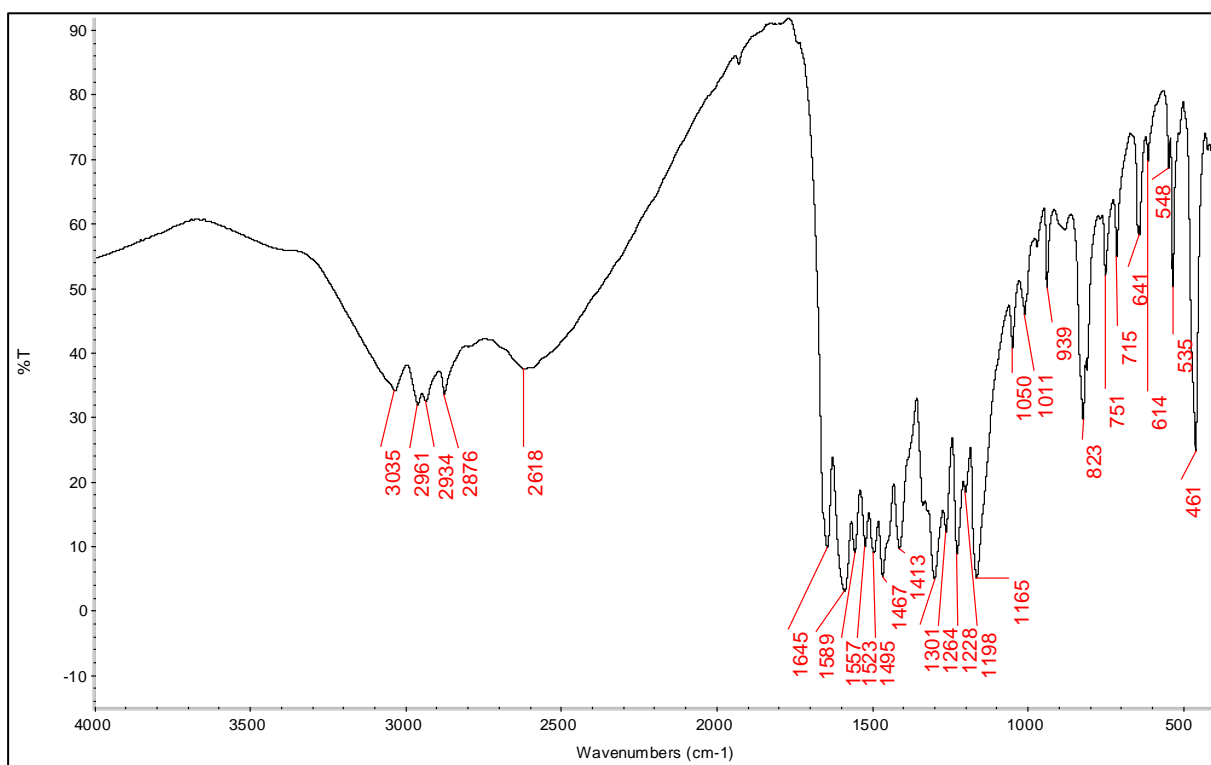

Figure S20. FTIR spectrum of 24.

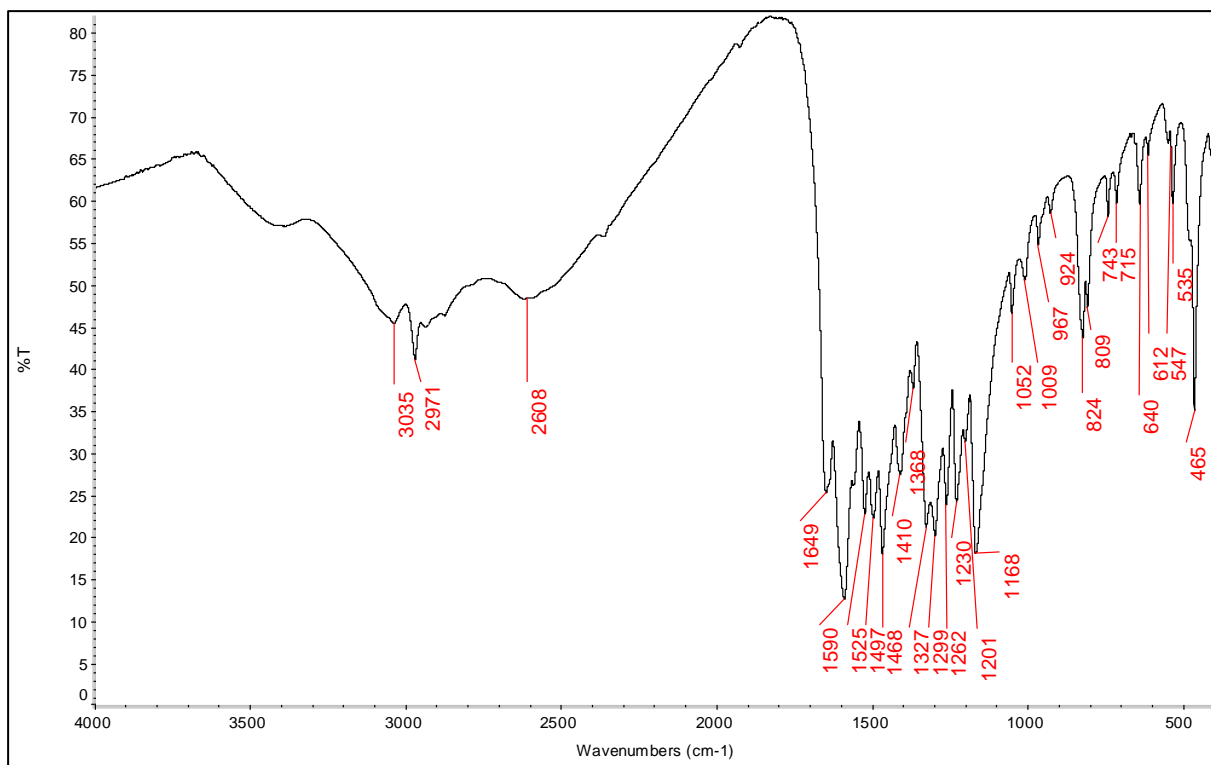

Figure S21. FTIR spectrum of 25.

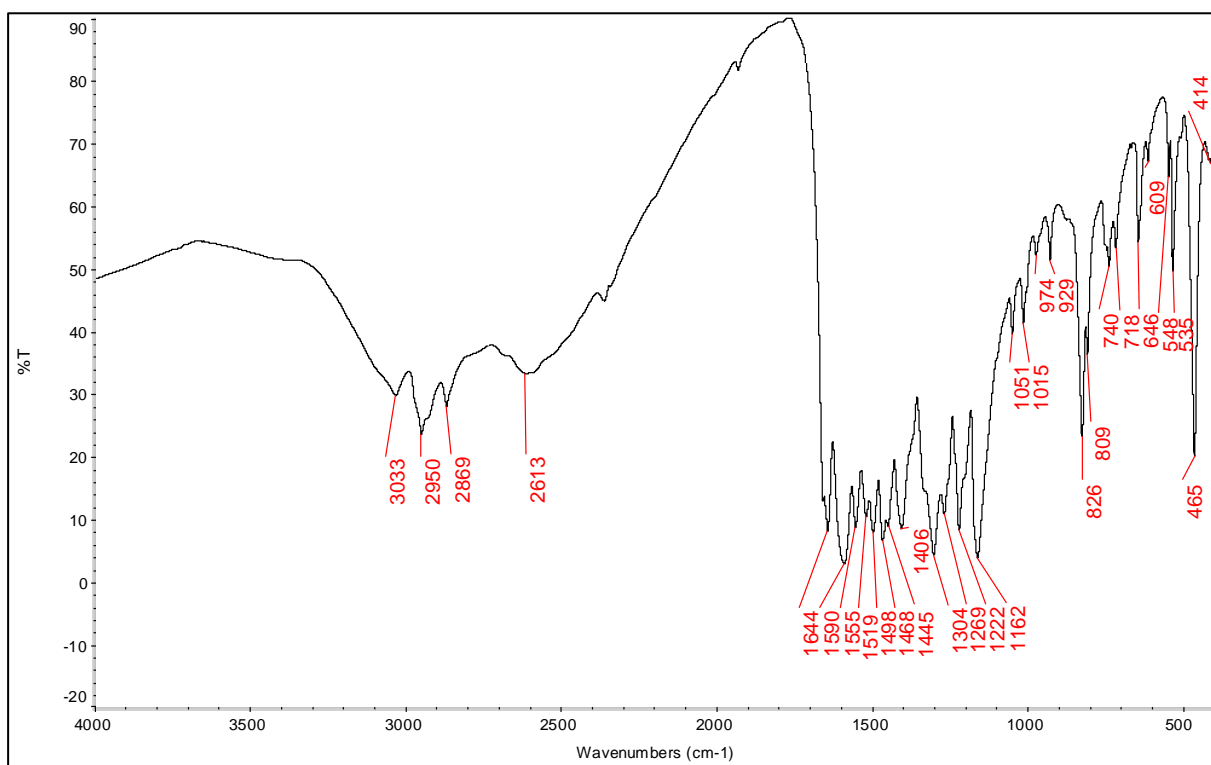

Figure S22. FTIR spectrum of 26.

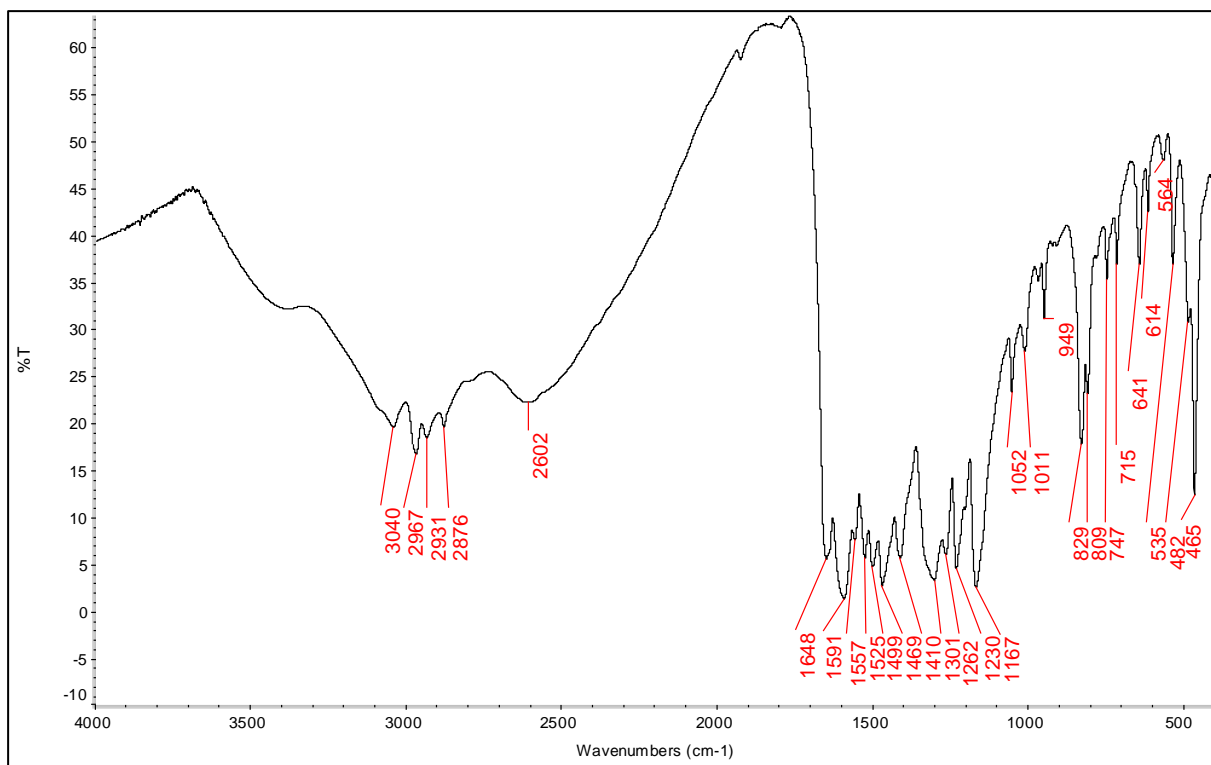

Figure S23. FTIR spectrum of 27.

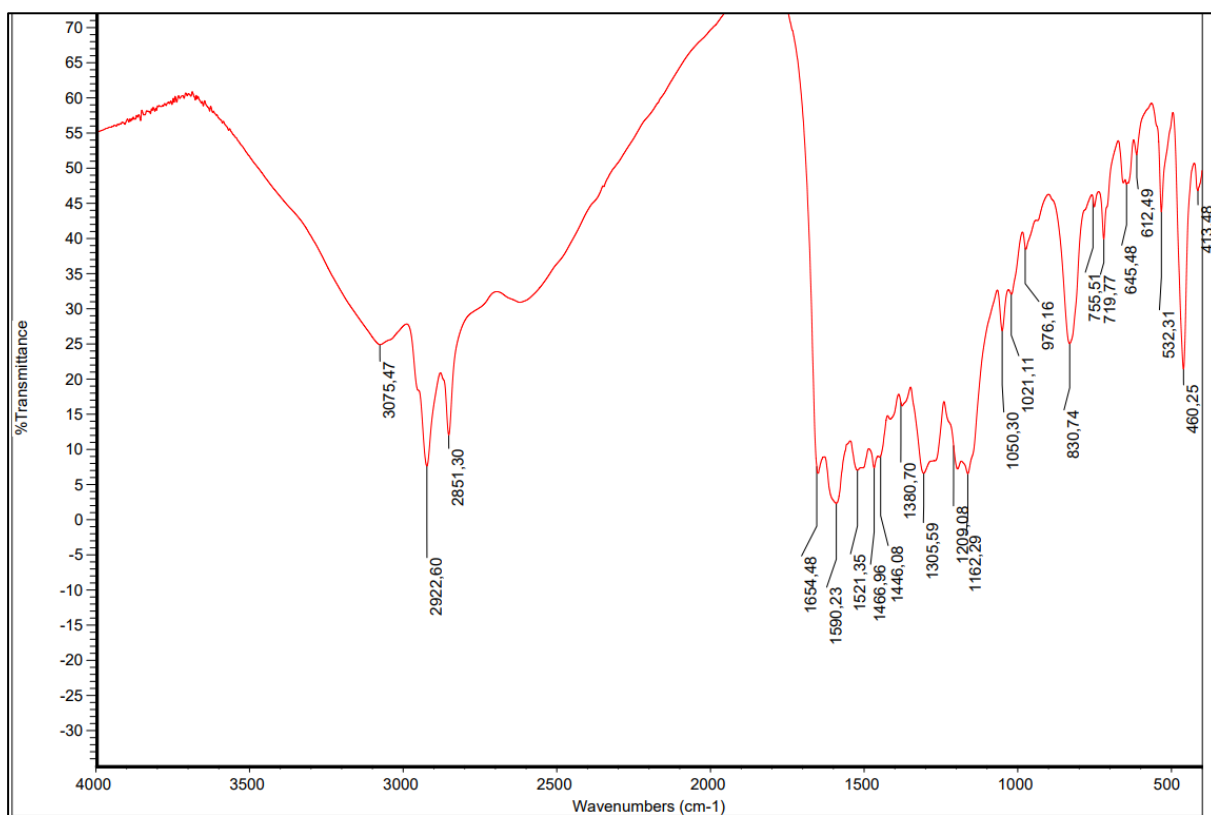

Figure S24. FTIR spectrum of 28.

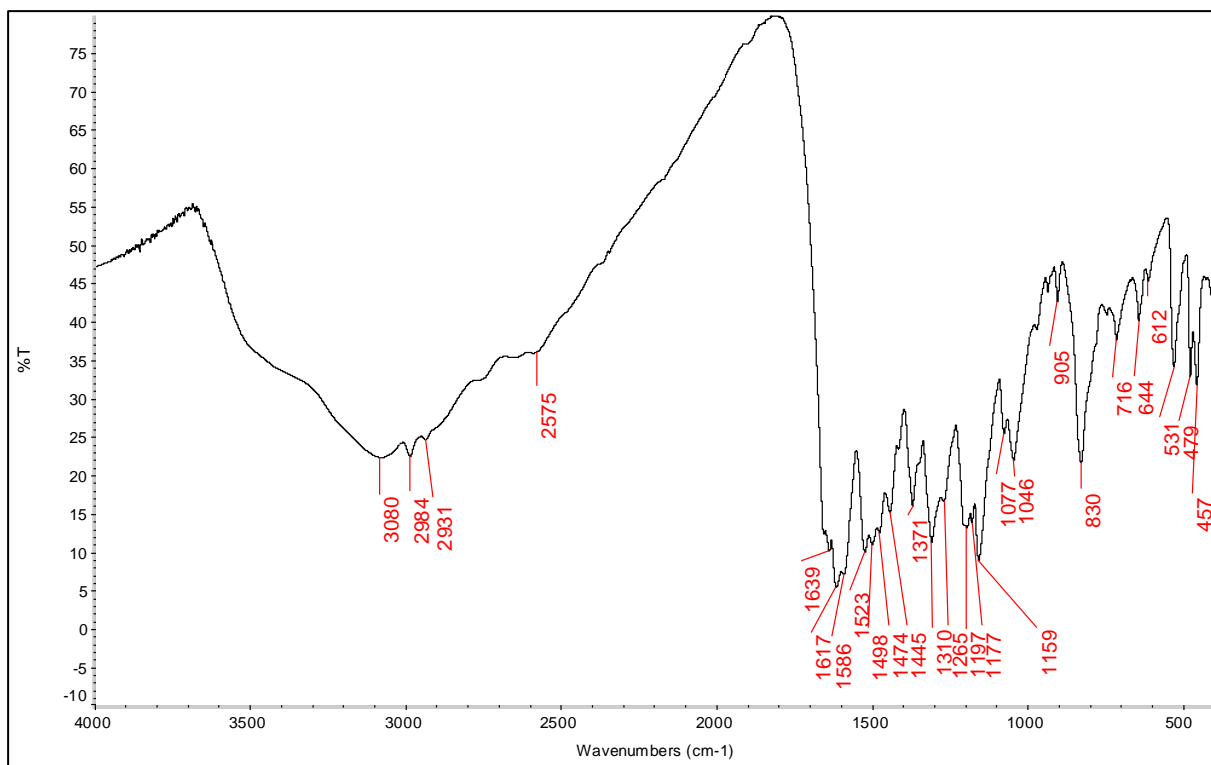

Figure S25. FTIR spectrum of 29.

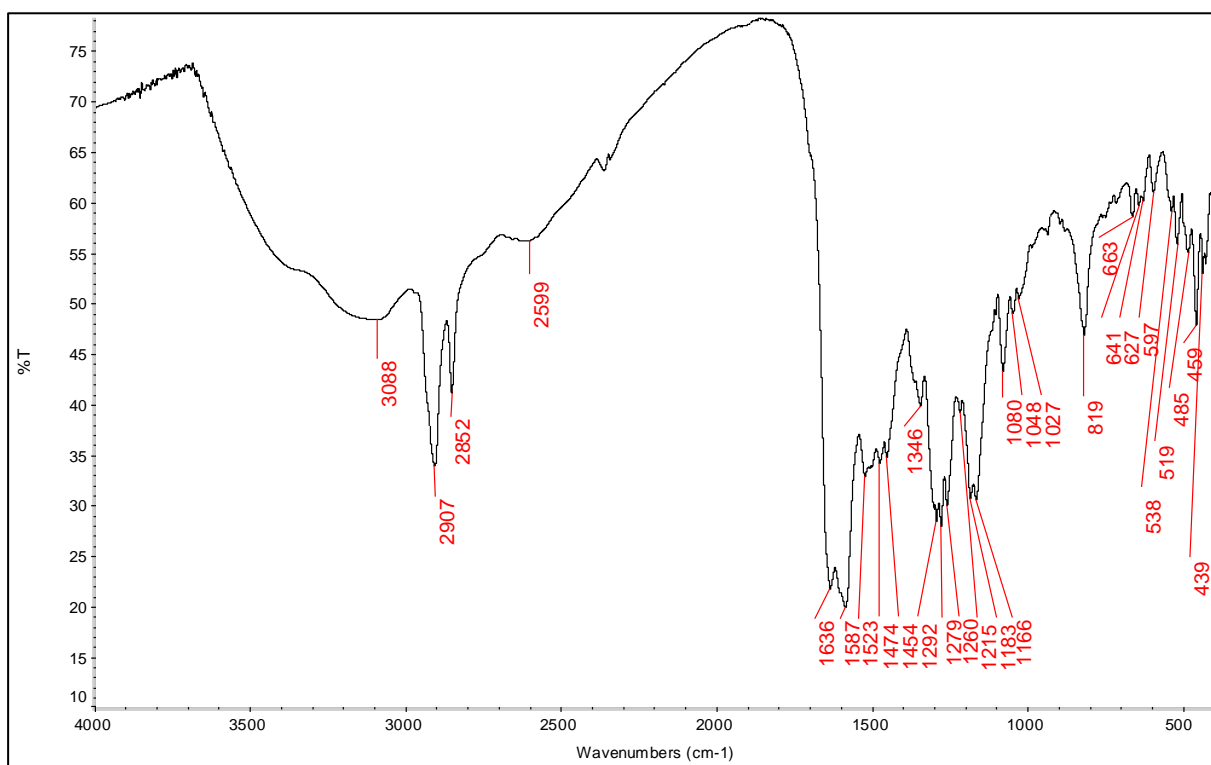

Figure S26. FTIR spectrum of 30.

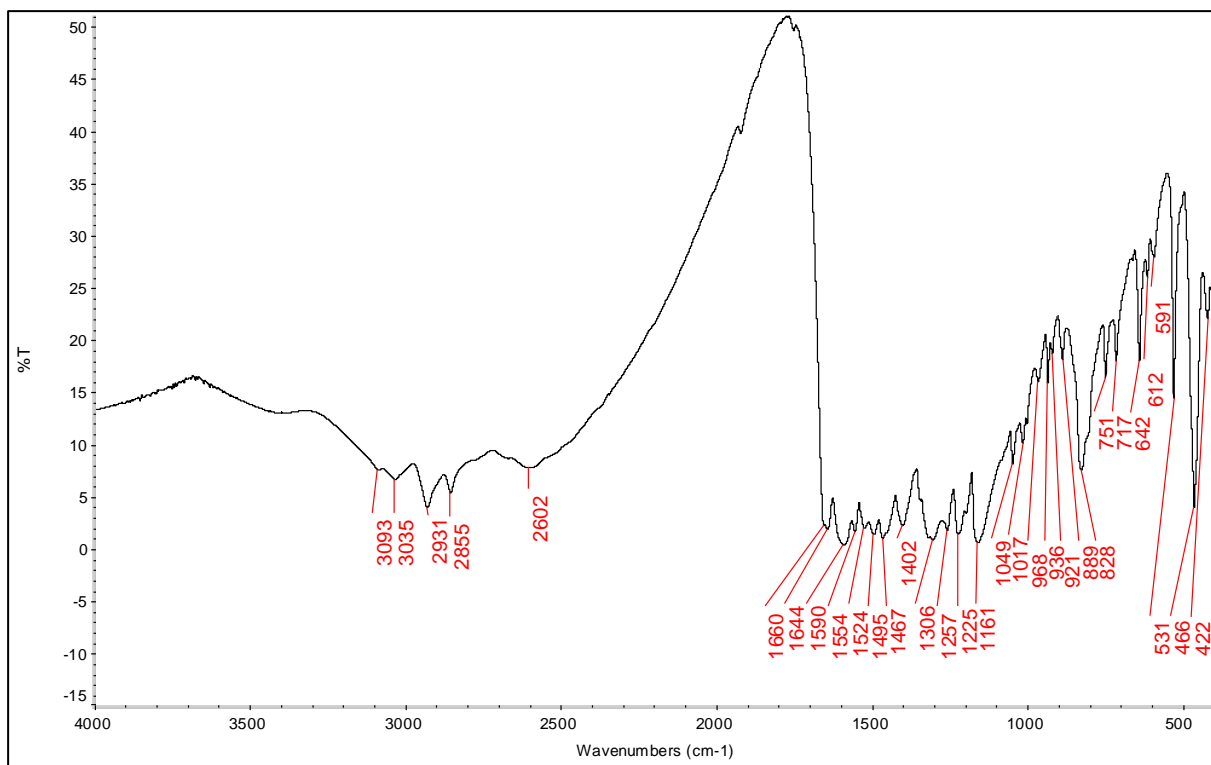

Figure S27. FTIR spectrum of 31.

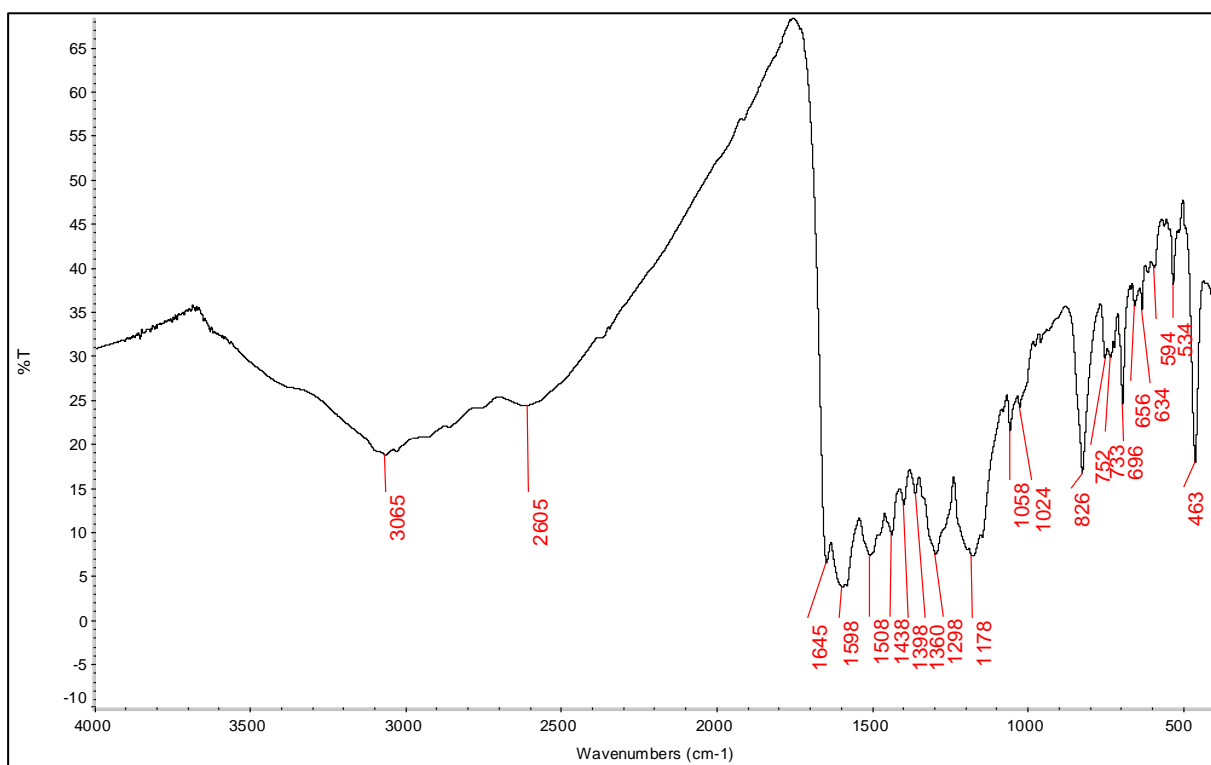

Figure S28. FTIR spectrum of 32.

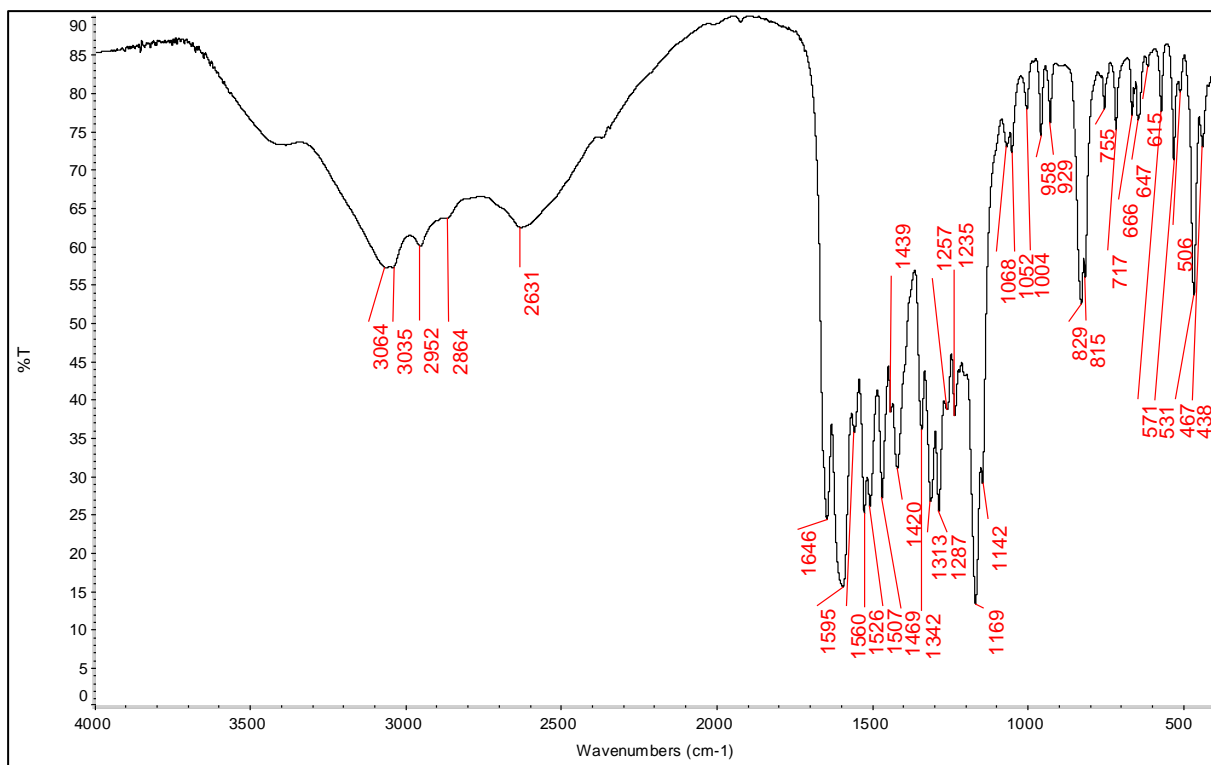

Figure S29. FTIR spectrum of 33.

Compound 51. IR (KBr) spectrum

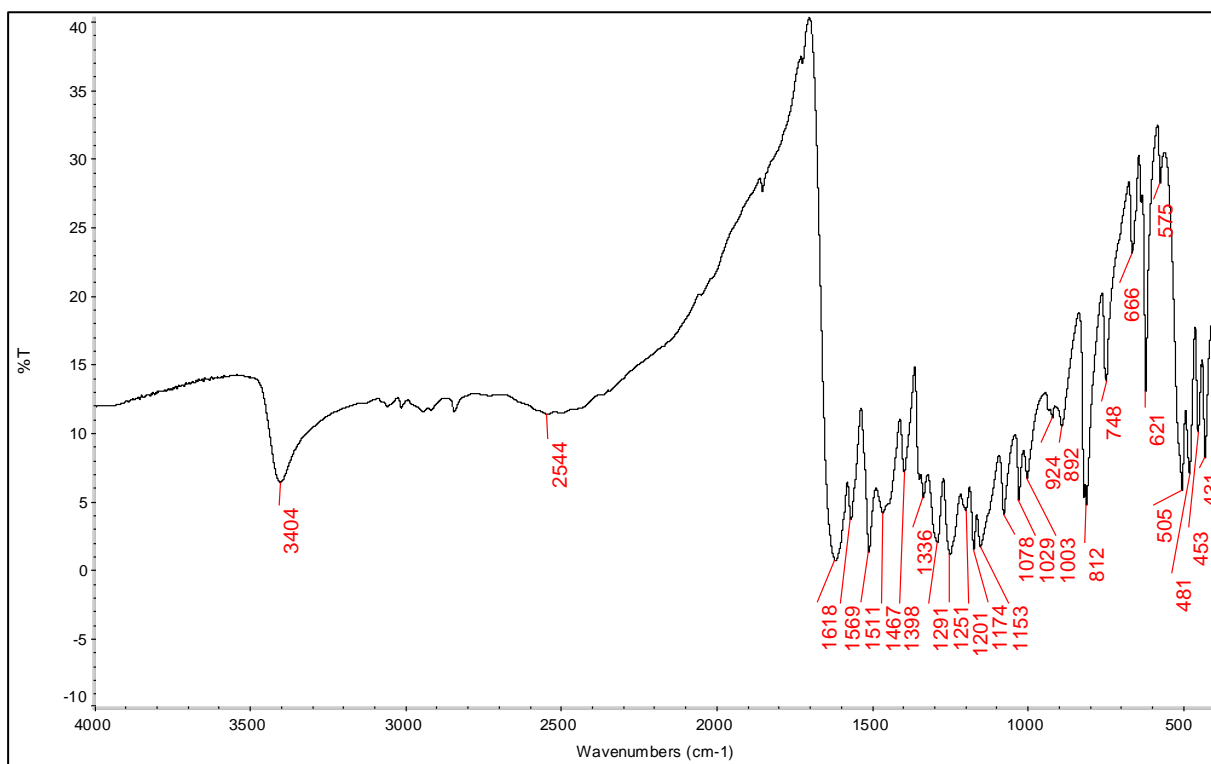

Figure S30. FTIR spectrum of 51.

# <sup>1</sup>H NMR, <sup>13</sup>C NMR AND DEPT SPECTRA

(18) H-NMR in DMSO-d<sub>6</sub> / 500 MHz

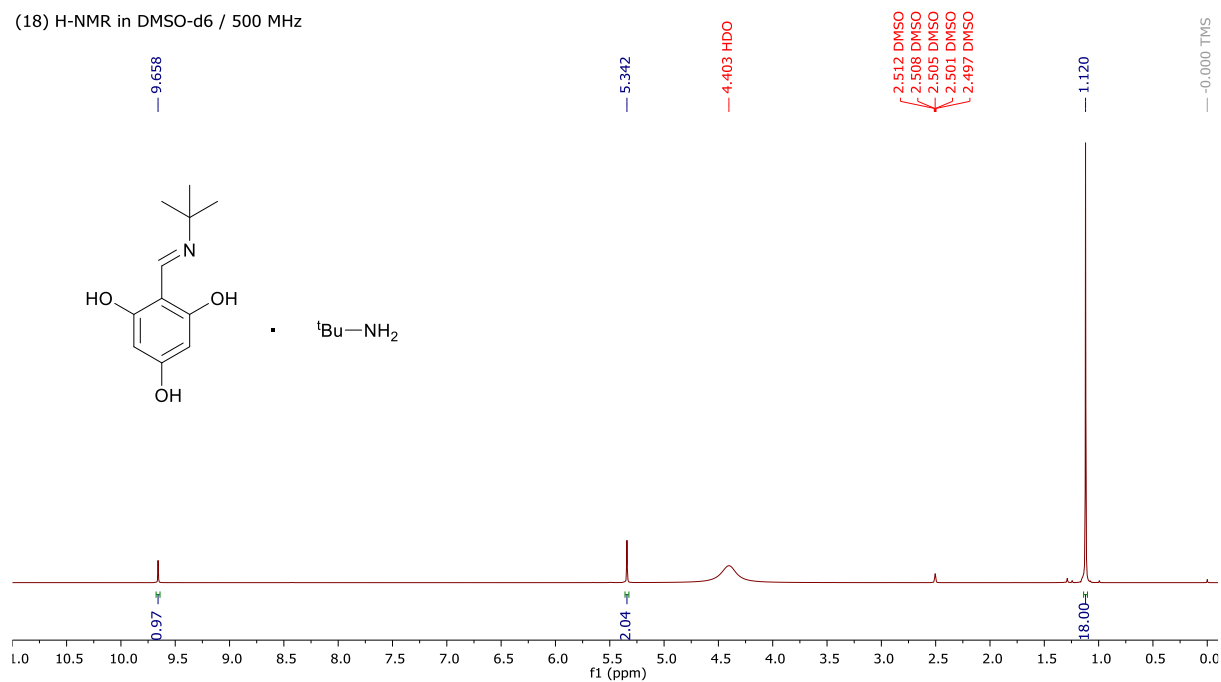

Figure S31. <sup>1</sup>H NMR spectrum of **18** in DMSO-d<sub>6</sub> / 500 MHz.

(18) <sup>13</sup>C-NMR and DEPT in DMSO-d<sub>6</sub> / 125 MHz

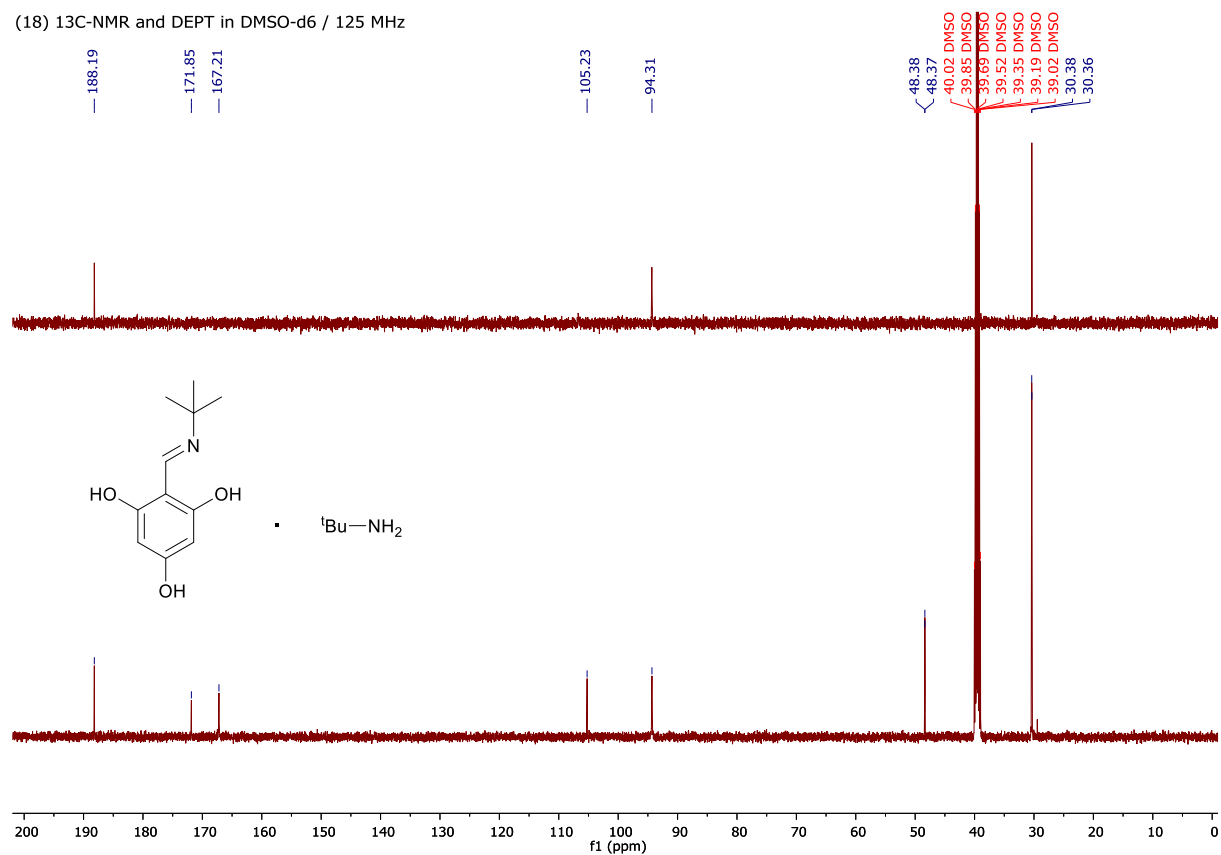

Figure S32. <sup>13</sup>C NMR and DEPT spectra of **18** in DMSO-d<sub>6</sub> / 125 MHz.



(19) <sup>1</sup>H-NMR in DMSO-d<sub>6</sub> / 500 MHz

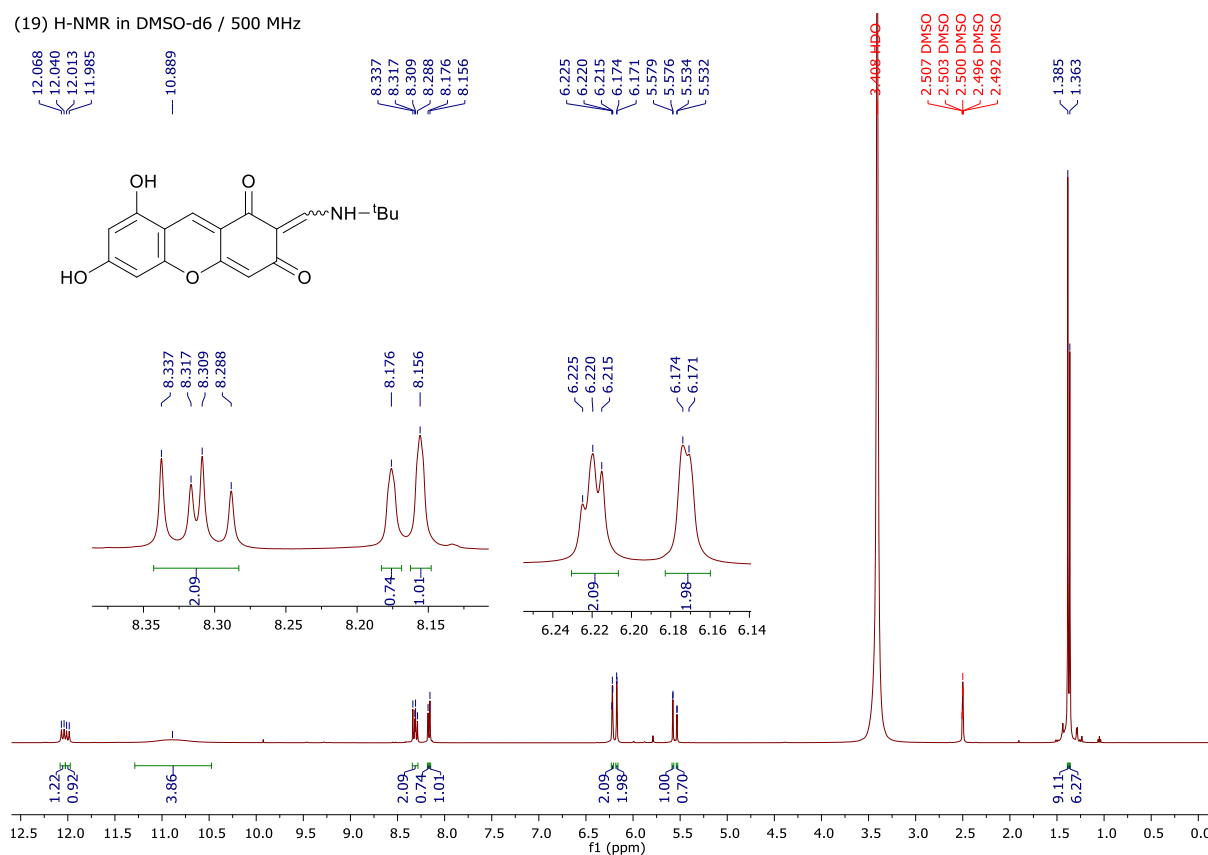

Figure S33. <sup>1</sup>H NMR spectrum of **19** in DMSO-d<sub>6</sub> / 500 MHz.

(19) <sup>13</sup>C-NMR and DEPT in DMSO-d<sub>6</sub> / 125 MHz

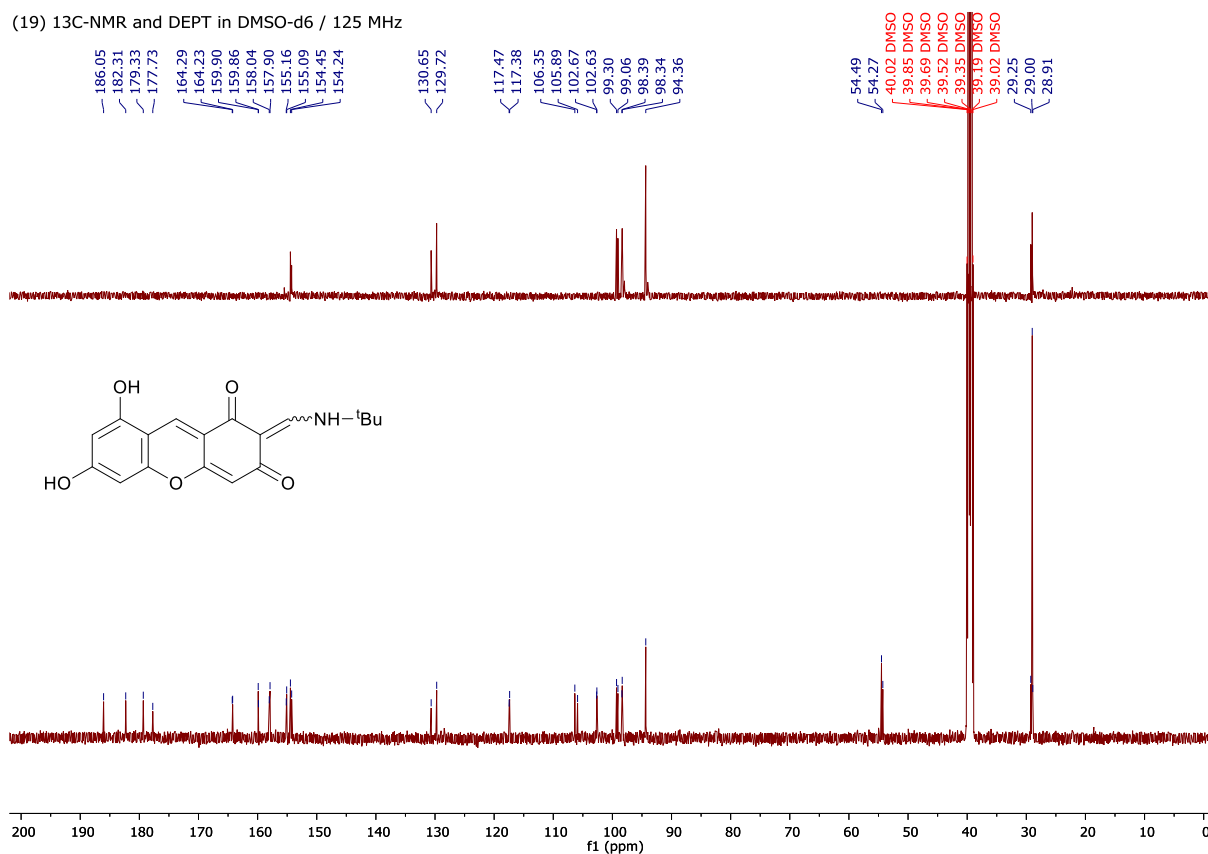

Figure S34. <sup>13</sup>C NMR and DEPT spectra of **19** in DMSO-d<sub>6</sub> / 125 MHz.

(23) <sup>1</sup>H-NMR in DMSO-d<sub>6</sub> / 500 MHz

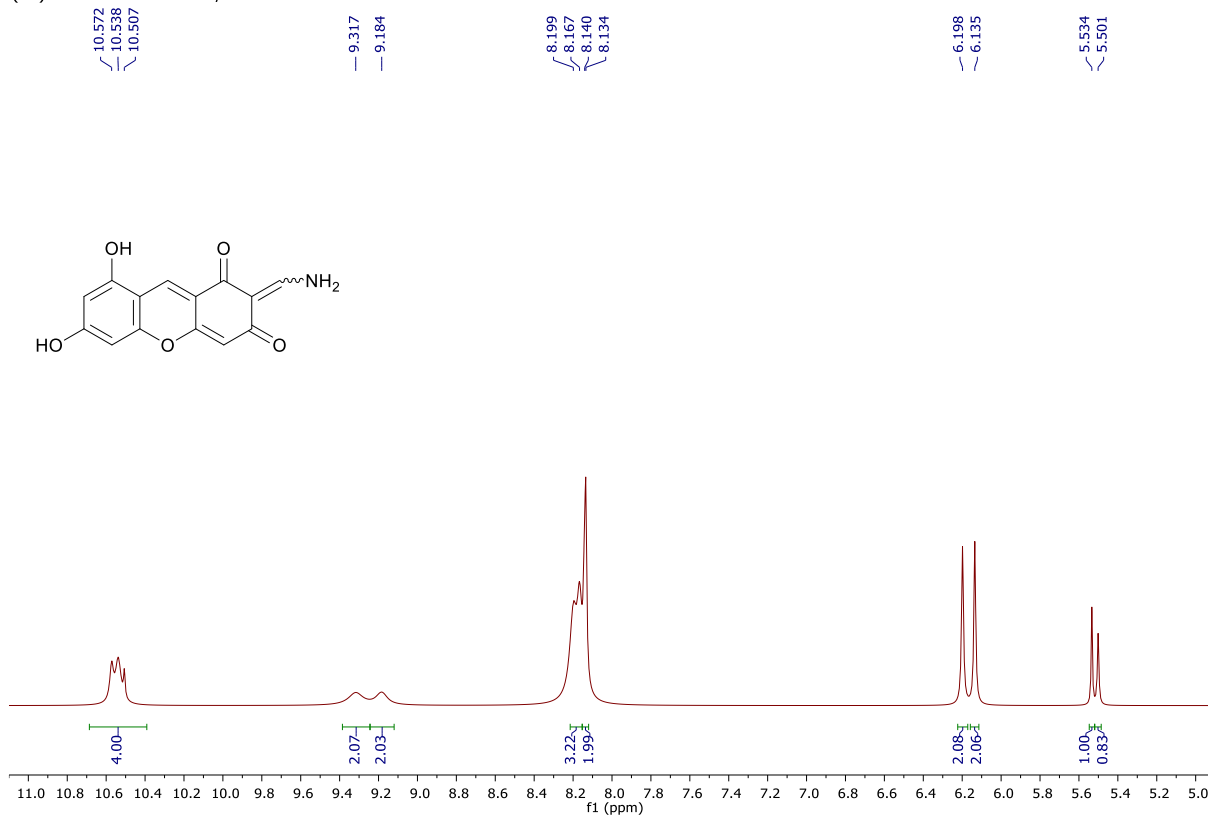

**Figure S35.** <sup>1</sup>H NMR spectrum of **23** in DMSO-d<sub>6</sub> / 500 MHz.

(24) <sup>1</sup>H-NMR in DMSO-d<sub>6</sub> / 500 MHz

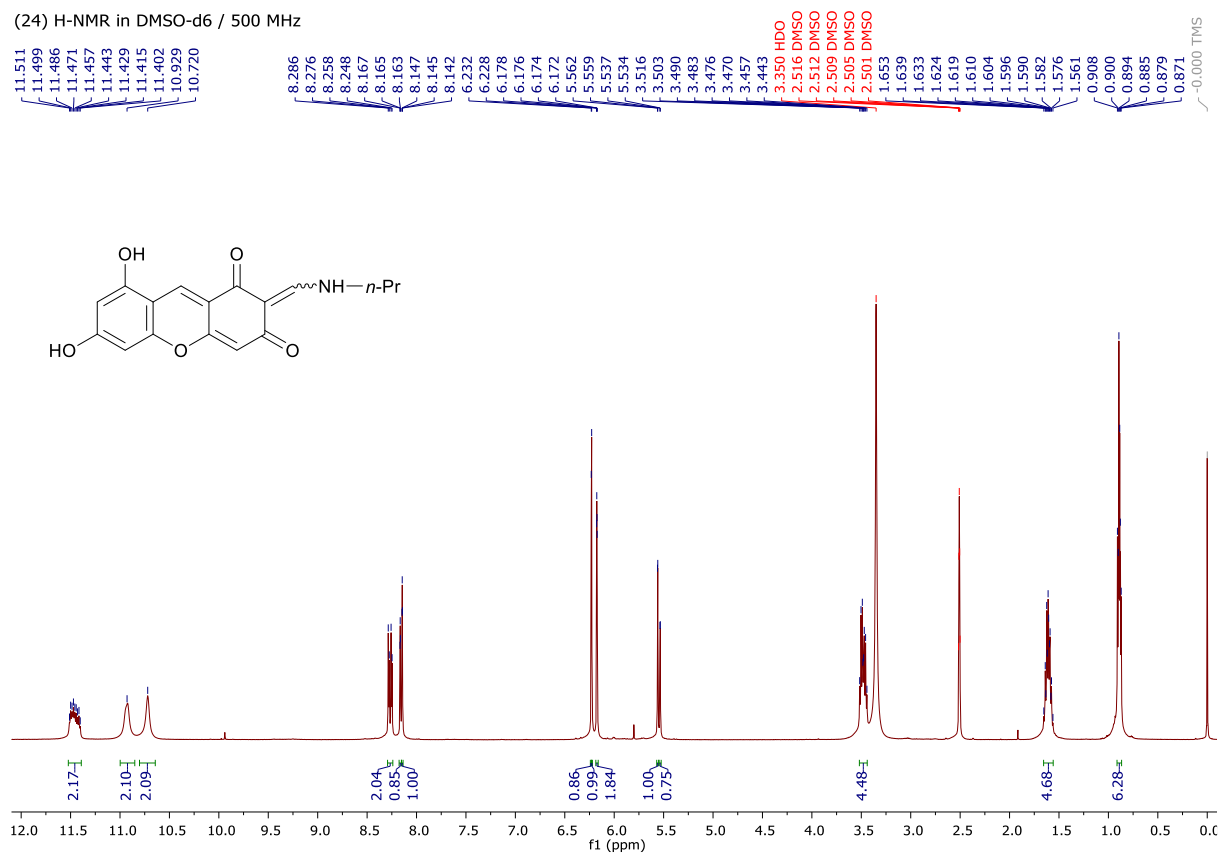

Figure S36. <sup>1</sup>H NMR spectrum of 24 in DMSO-d<sub>6</sub> / 500 MHz.

(24) <sup>13</sup>C-NMR and DEPT in DMSO-d<sub>6</sub> / 125 MHz

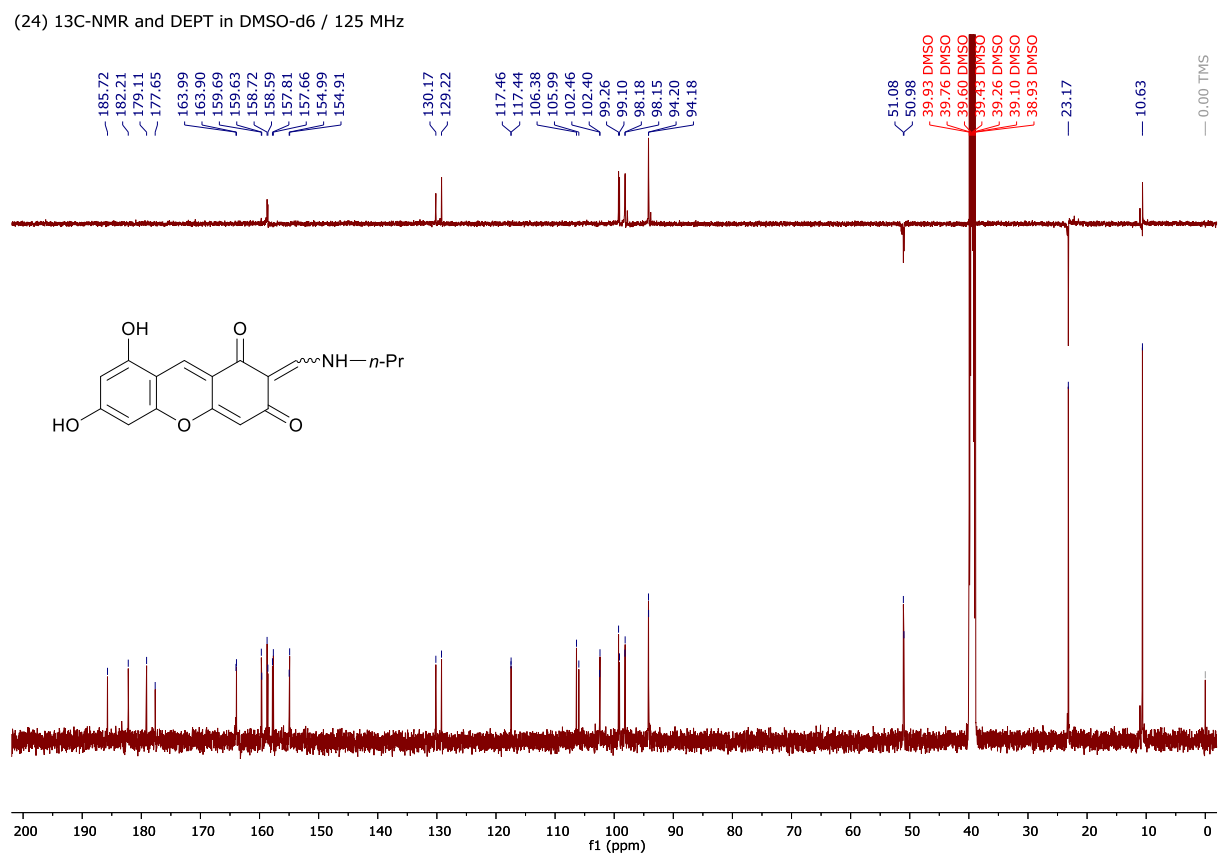

Figure S37. <sup>13</sup>C NMR and DEPT spectra of 24 in DMSO-d<sub>6</sub> / 125 MHz.

(25) <sup>1</sup>H-NMR in DMSO-d<sub>6</sub> / 500 MHz

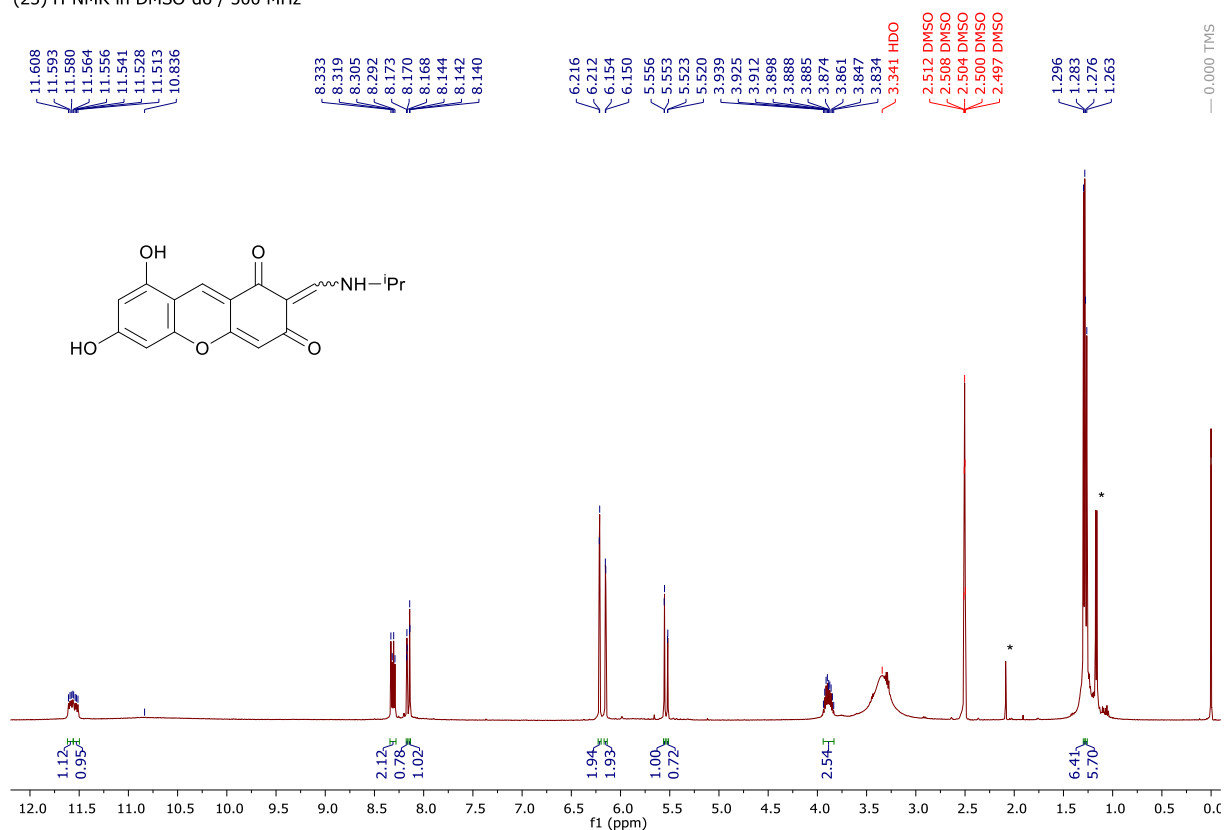

Figure S38. <sup>1</sup>H NMR spectrum of **25** in DMSO-d<sub>6</sub> / 500 MHz.

(25) <sup>13</sup>C-NMR and DEPT in DMSO-d<sub>6</sub> / 125 MHz

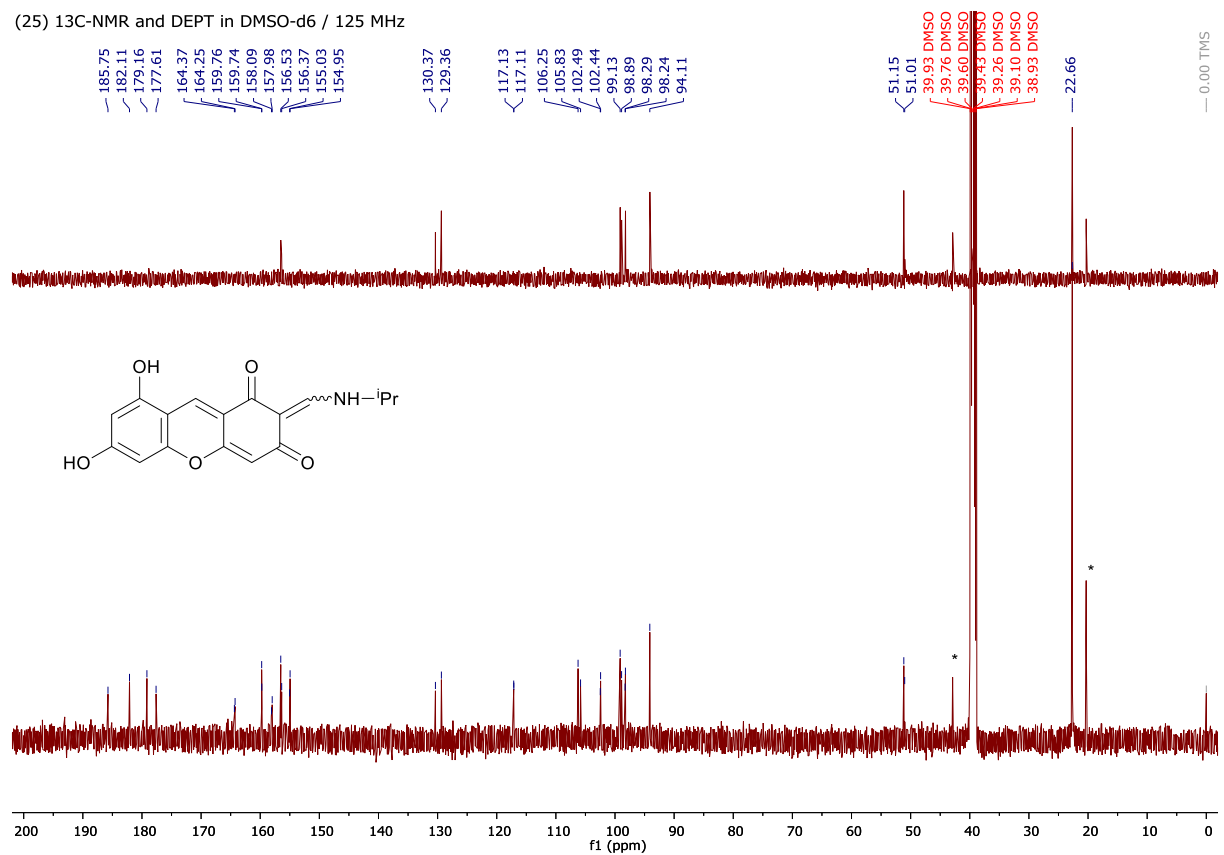

Figure S39. <sup>13</sup>C NMR and DEPT spectra of **25** in DMSO-d<sub>6</sub> / 125 MHz.

(26) <sup>1</sup>H-NMR in DMSO-d<sub>6</sub> / 500 MHz

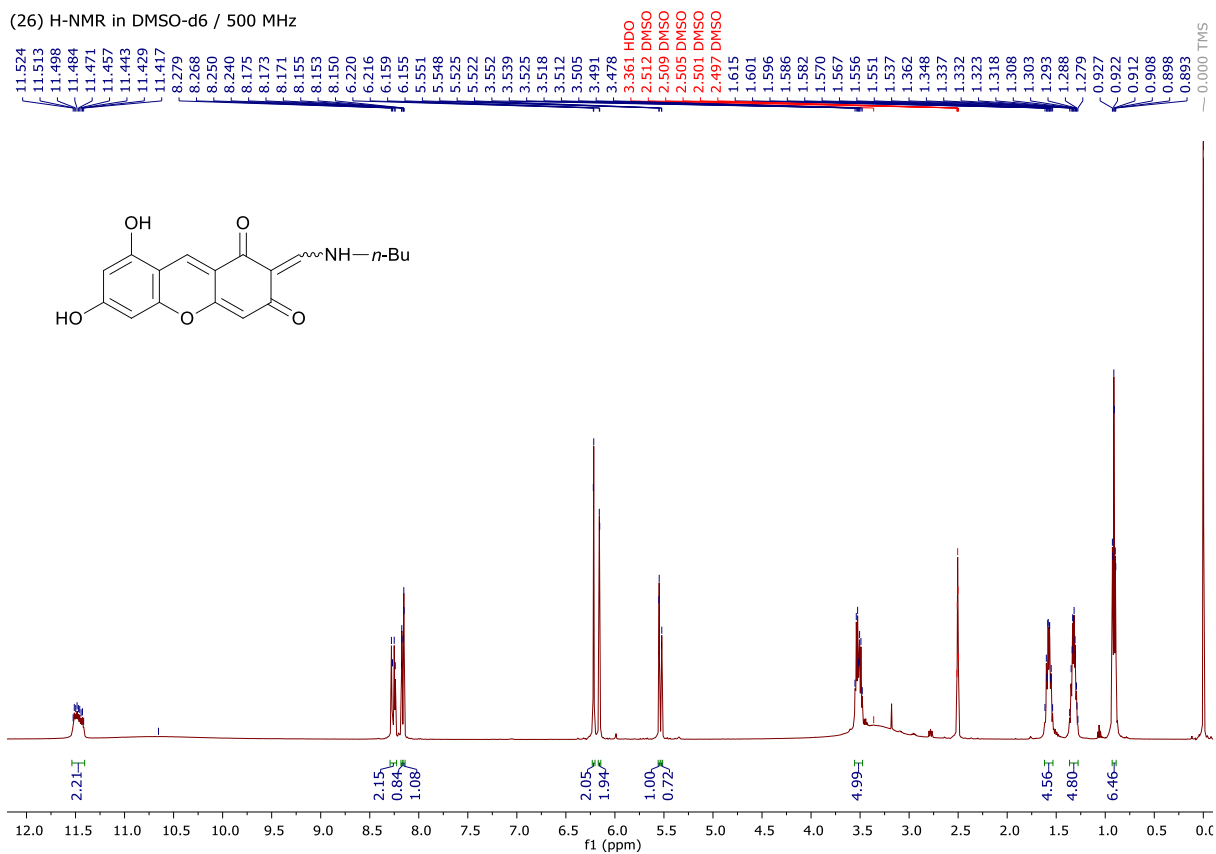

Figure S40. <sup>1</sup>H NMR spectra of **26** in DMSO-d<sub>6</sub> / 500 MHz.

(26) <sup>13</sup>C-NMR and DEPT in DMSO-d<sub>6</sub> / 125 MHz

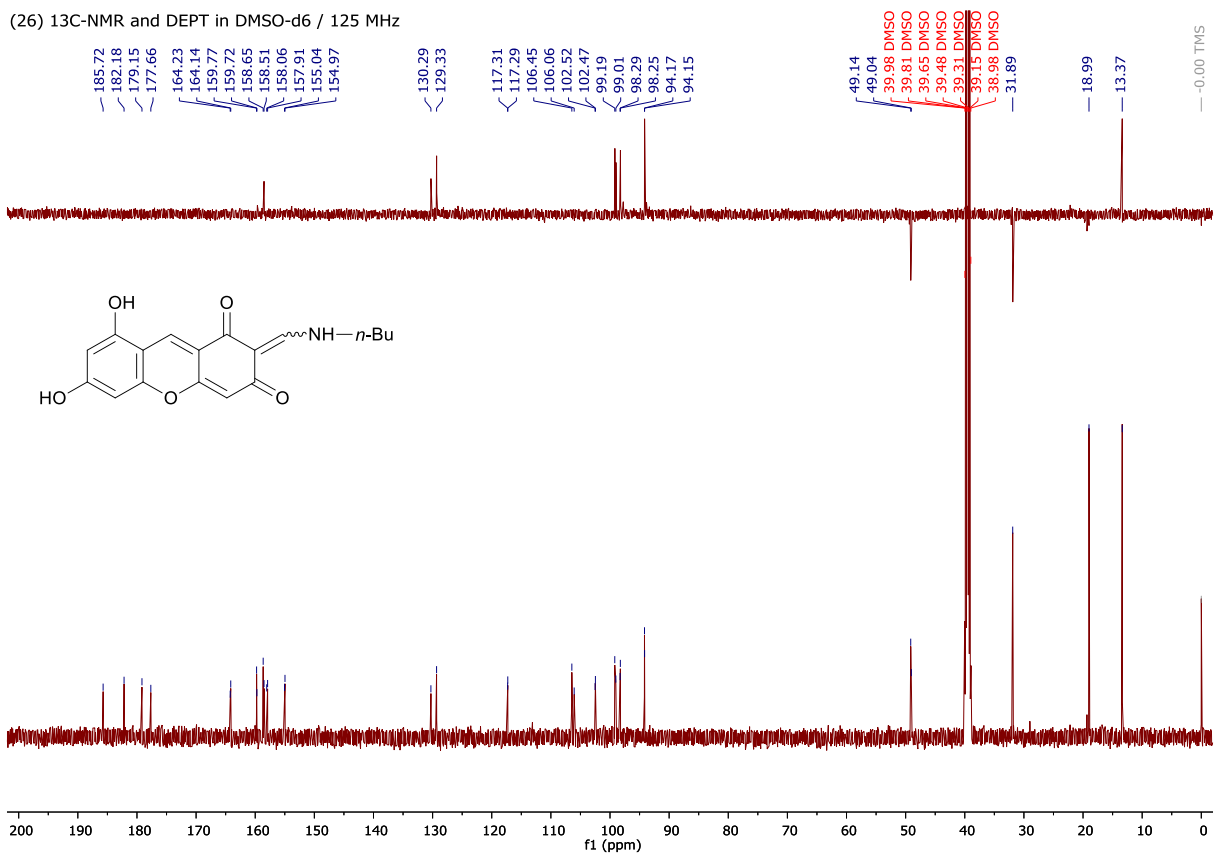

Figure S41. <sup>13</sup>C NMR and DEPT spectra of **26** in DMSO-d<sub>6</sub> / 125 MHz.

(27) <sup>1</sup>H-NMR in DMSO-d<sub>6</sub> / 500 MHz

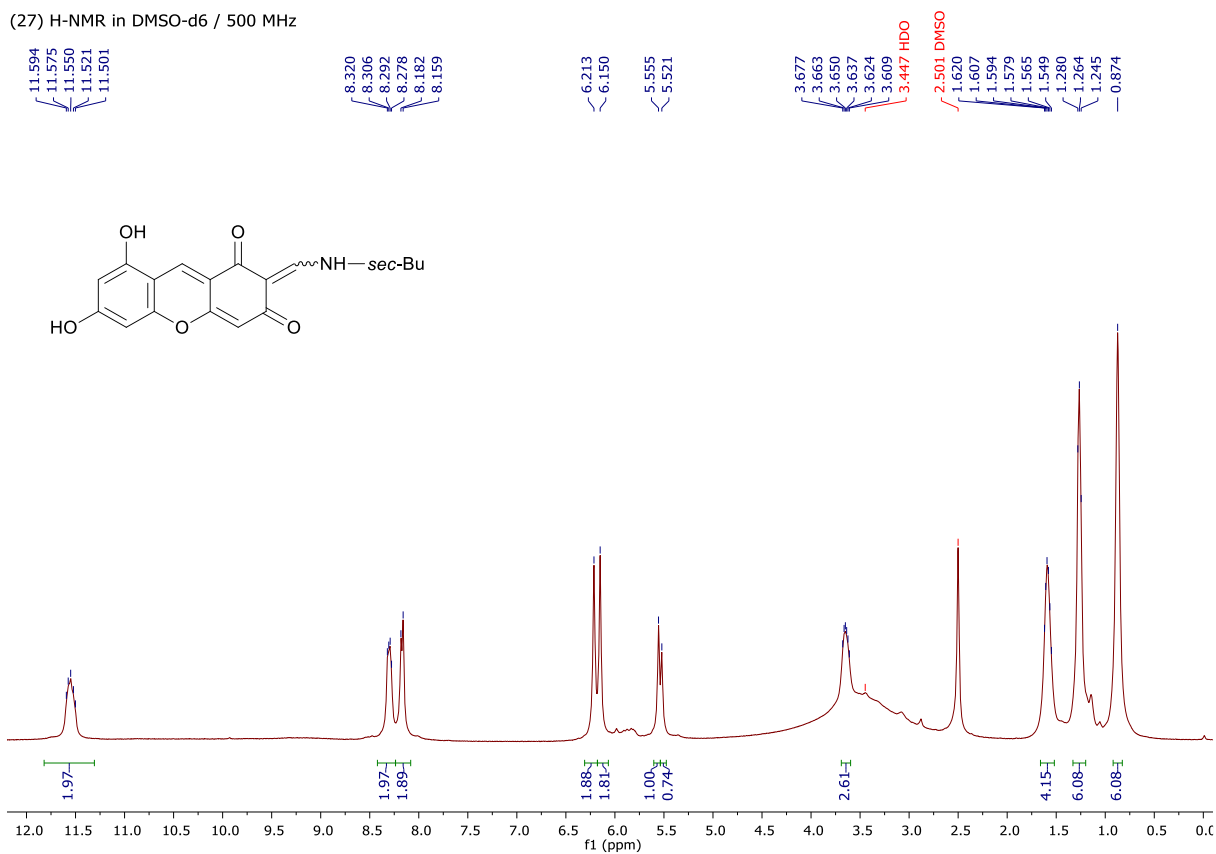

Figure S42. <sup>1</sup>H NMR spectrum of **27** in DMSO-d<sub>6</sub> / 500 MHz.

(27) <sup>13</sup>C-NMR and DEPT in DMSO-d<sub>6</sub> / 125 MHz

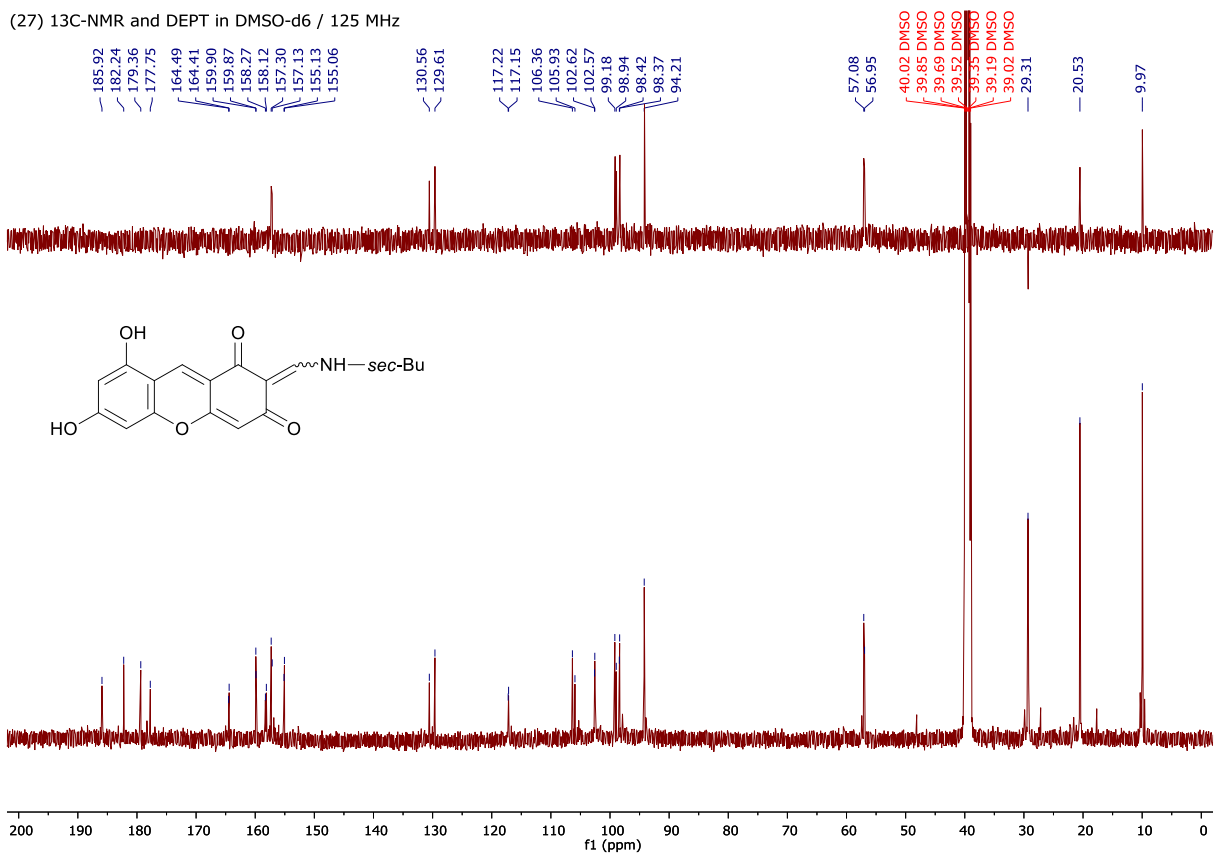

Figure S43. <sup>13</sup>C NMR and DEPT spectra of **27** in DMSO-d<sub>6</sub> / 125 MHz.

(28) <sup>1</sup>H-NMR in DMSO-d<sub>6</sub> / 500 MHz

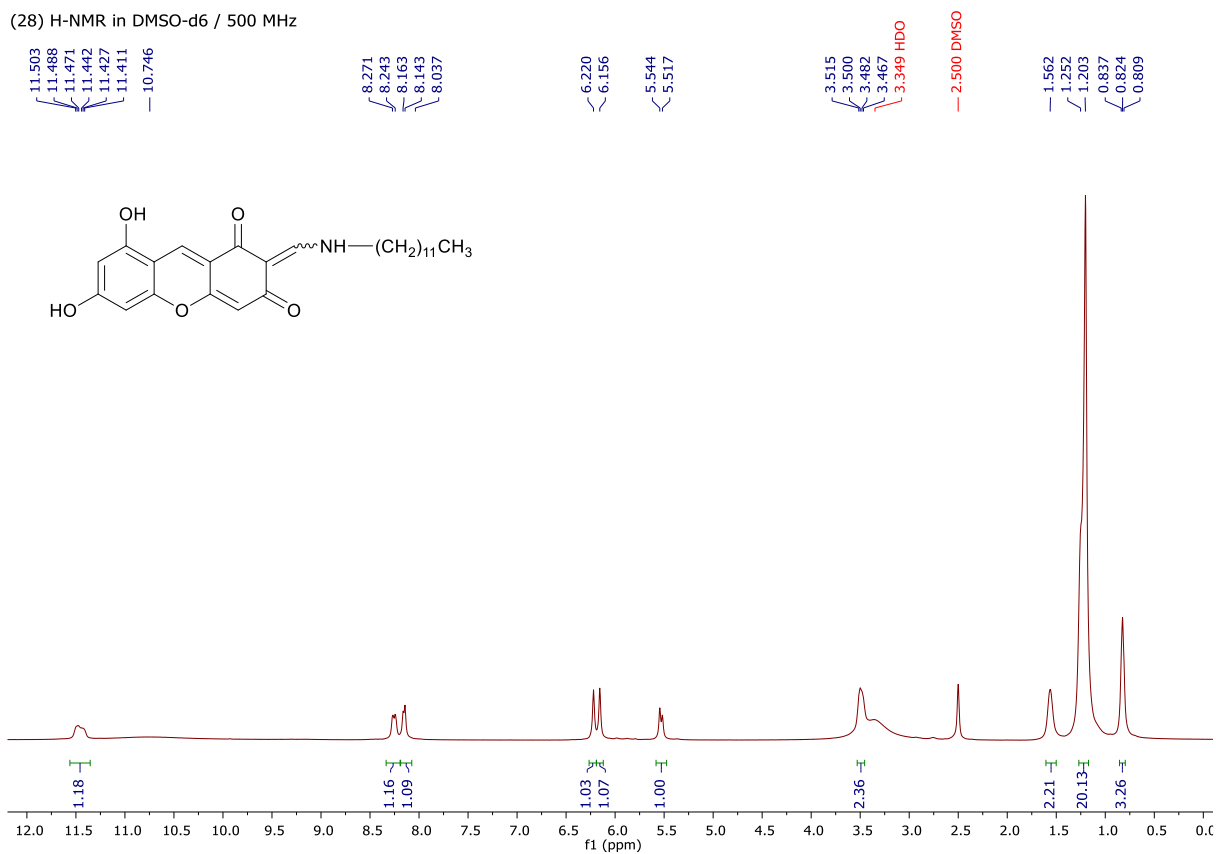

Figure S44. <sup>1</sup>H NMR spectrum of **28** in DMSO-d<sub>6</sub> / 500 MHz.

(28) <sup>13</sup>C-NMR and DEPT in DMSO-d<sub>6</sub> / 125 MHz

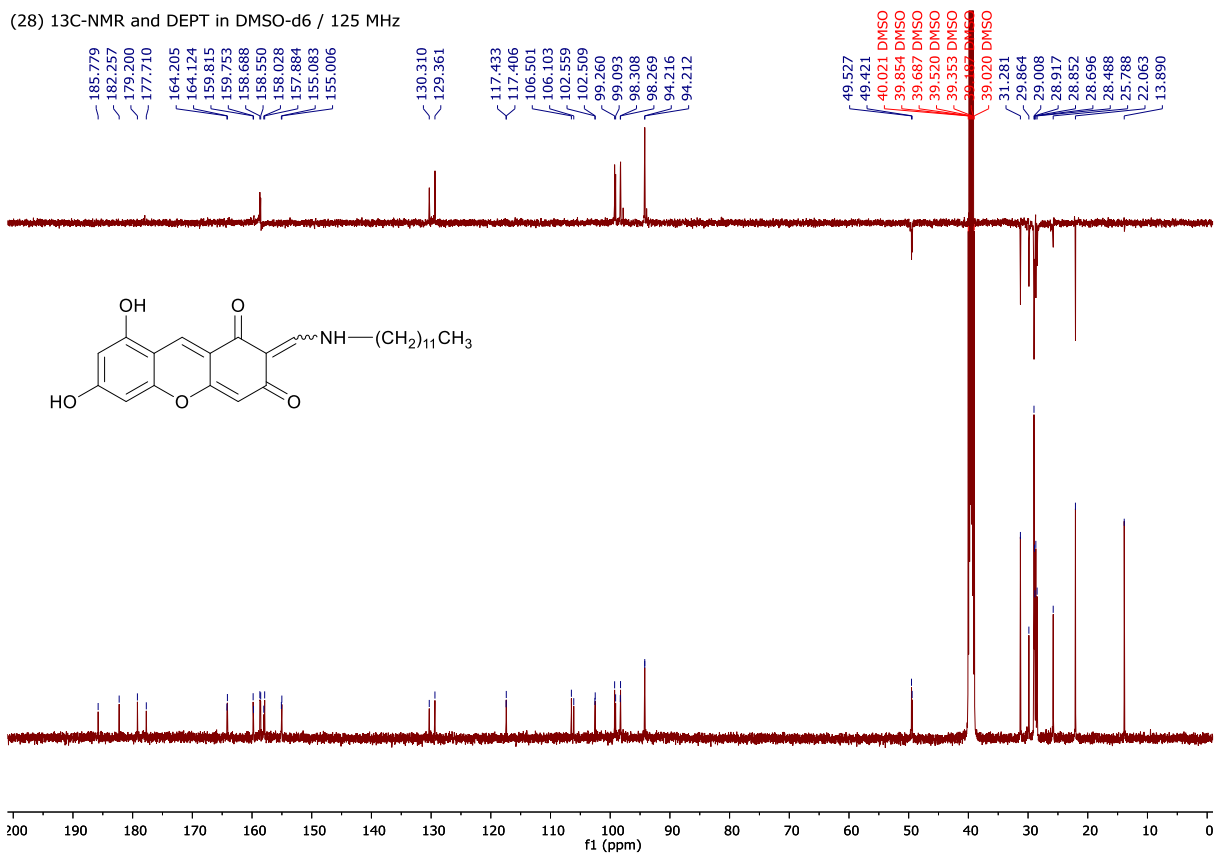

Figure S45. <sup>13</sup>C NMR and DEPT spectra of **28** in DMSO-d<sub>6</sub> / 125 MHz.

(29) <sup>1</sup>H-NMR in DMSO-d<sub>6</sub> / 500 MHz

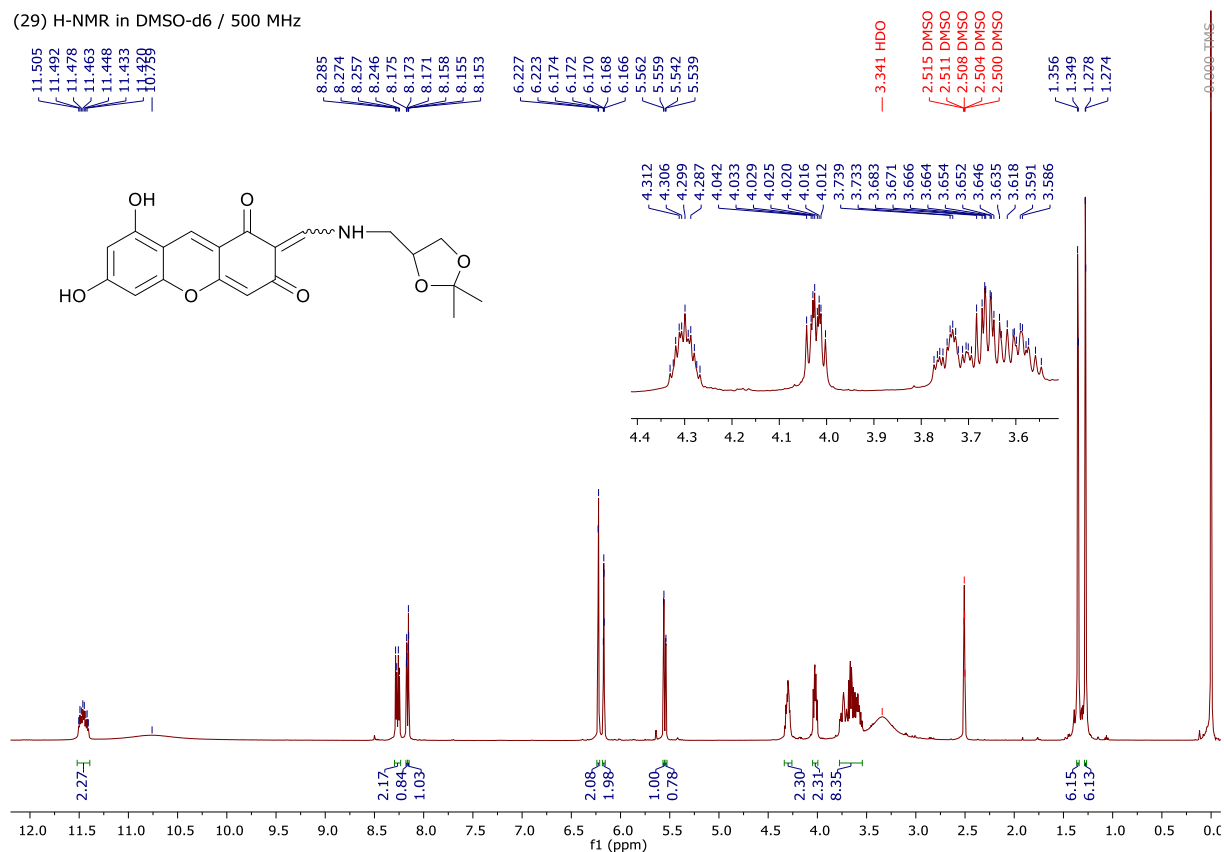

Figure S46. <sup>1</sup>H NMR spectrum of 29 in DMSO-d<sub>6</sub> / 500 MHz.

(29) <sup>13</sup>C-NMR and DEPT in DMSO-d<sub>6</sub> / 125 MHz

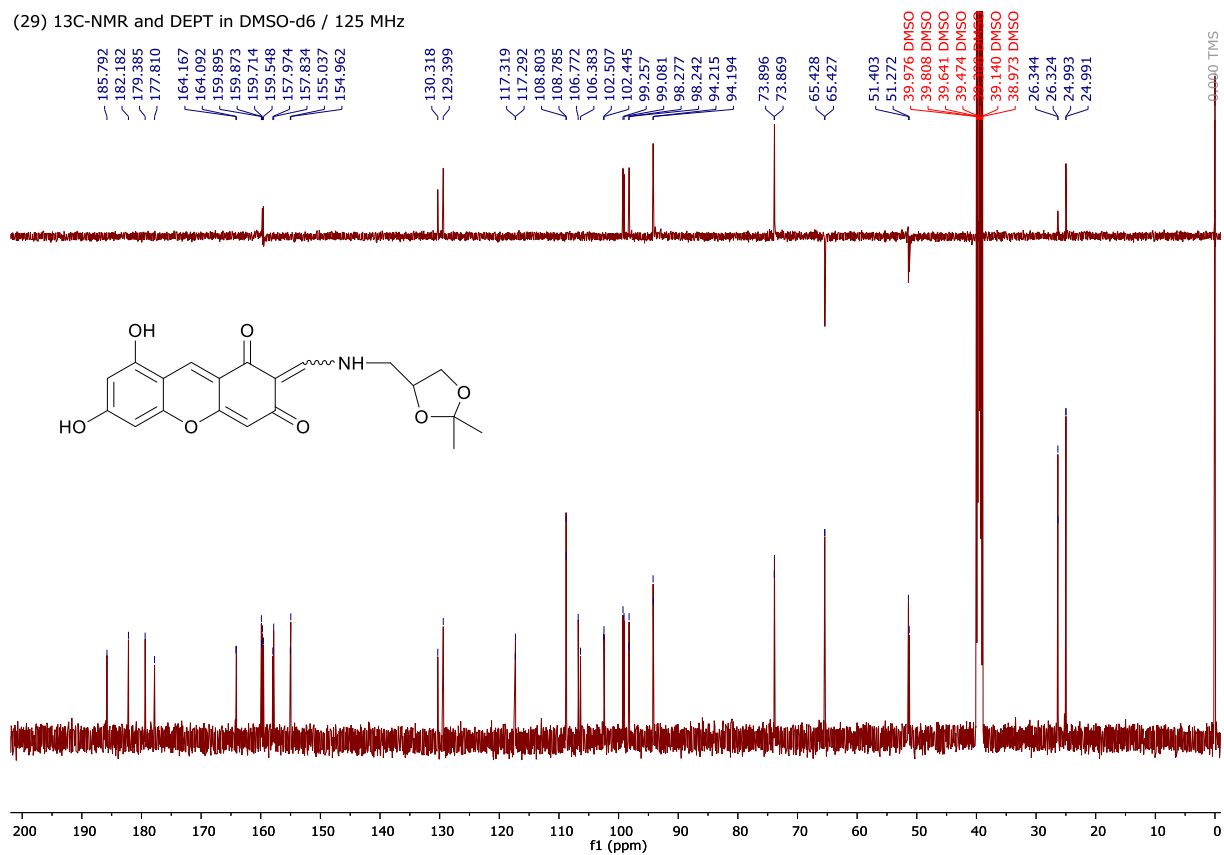

Figure S47. <sup>13</sup>C NMR and DEPT spectra of 29 in DMSO-d<sub>6</sub> / 125 MHz.



(30) <sup>1</sup>H-NMR in DMSO-d<sub>6</sub> / 500 MHz

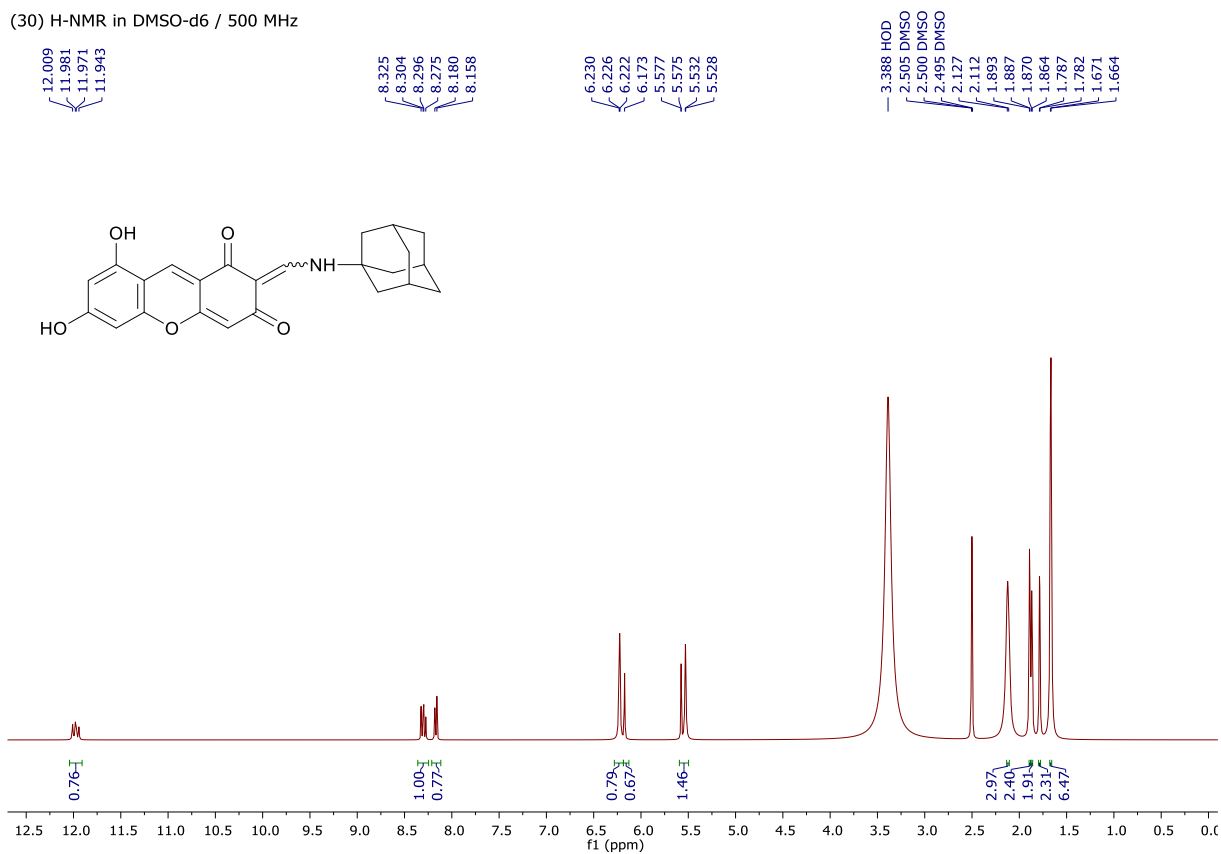

Figure S48. <sup>1</sup>H NMR spectrum of 30 in DMSO-d<sub>6</sub> / 500 MHz.

(30) <sup>13</sup>C-NMR in DMSO-d<sub>6</sub> / 125 MHz

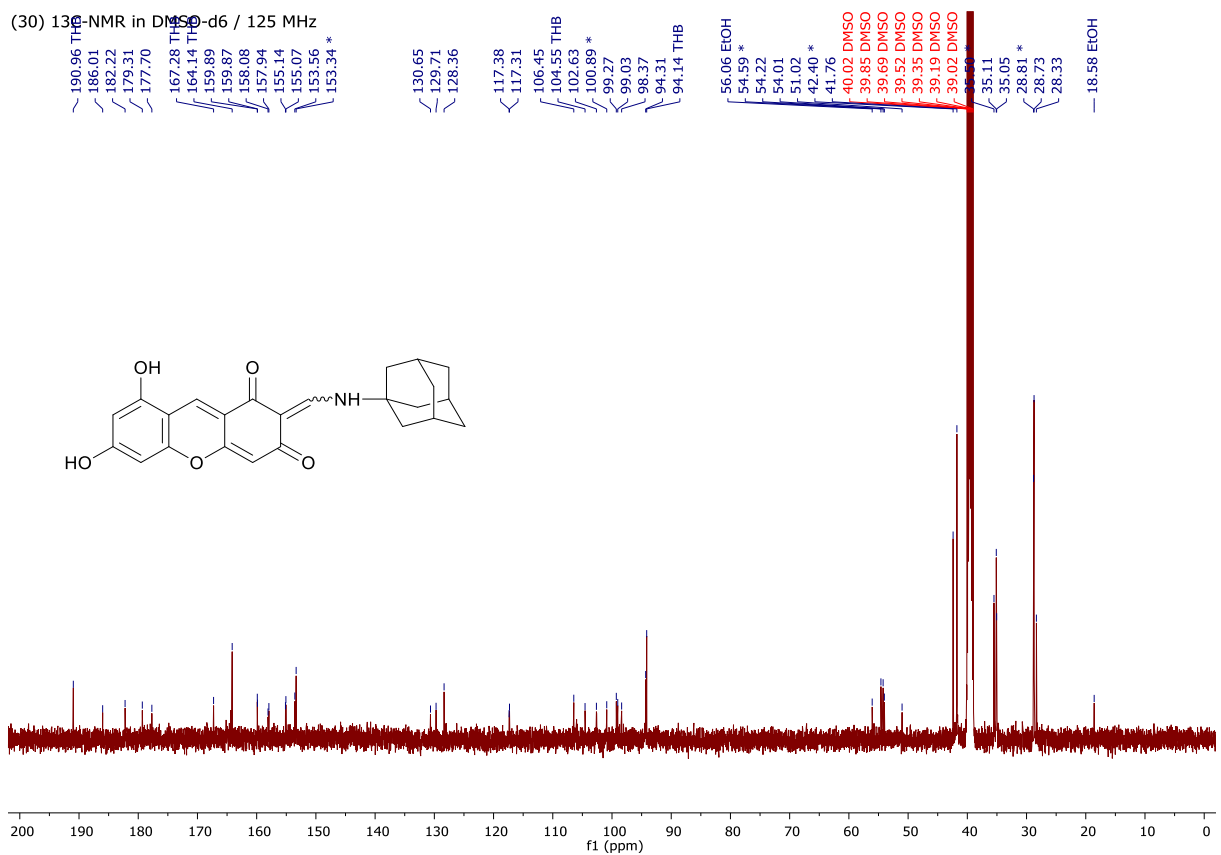

Figure S49. <sup>13</sup>C NMR and DEPT spectra of 30 in DMSO-d<sub>6</sub> / 125 MHz.

(31) <sup>1</sup>H-NMR in DMSO-d<sub>6</sub> / 500 MHz

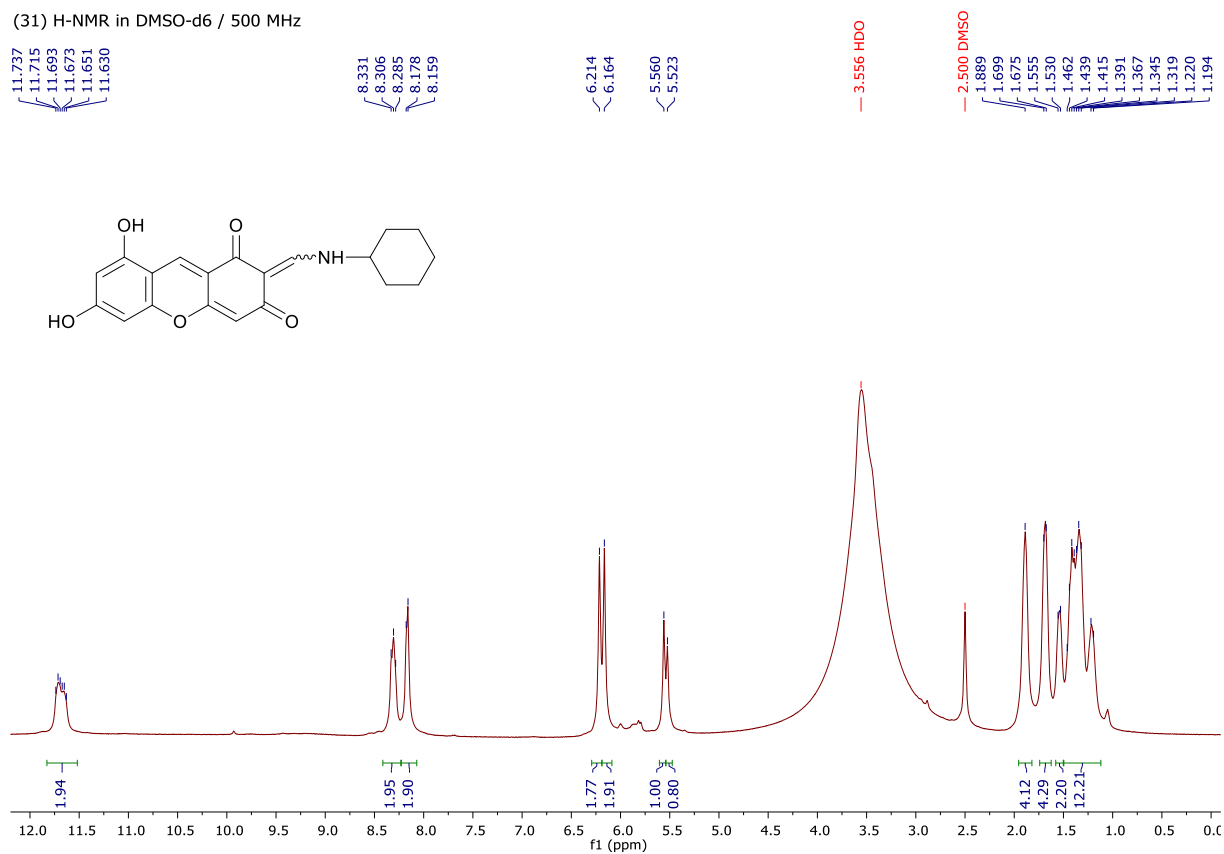

Figure S50. <sup>1</sup>H NMR spectrum of **31** in DMSO-d<sub>6</sub> / 500 MHz.

(31) <sup>13</sup>C-NMR and DEPT in DMSO-d<sub>6</sub> / 125 MHz

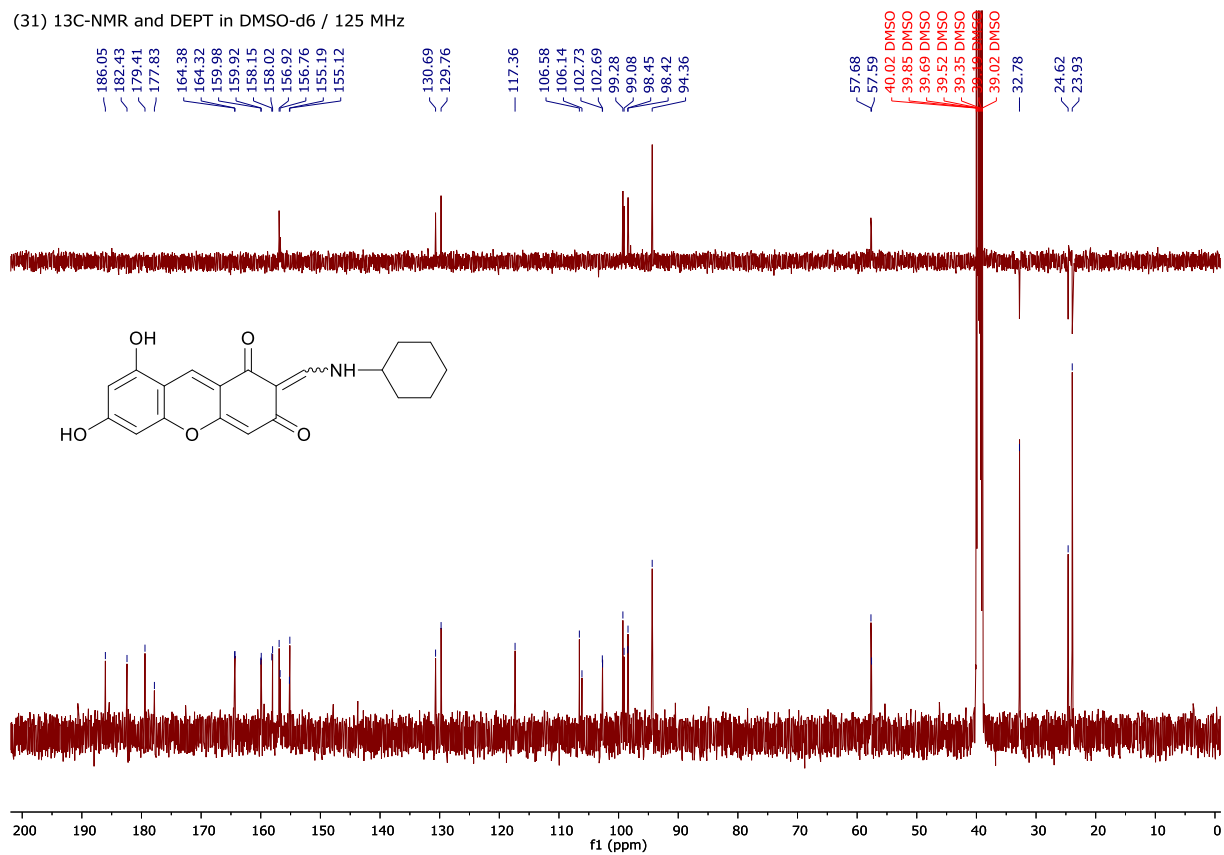

Figure S51. <sup>13</sup>C NMR and DEPT spectra of **31** in DMSO-d<sub>6</sub> / 125 MHz.

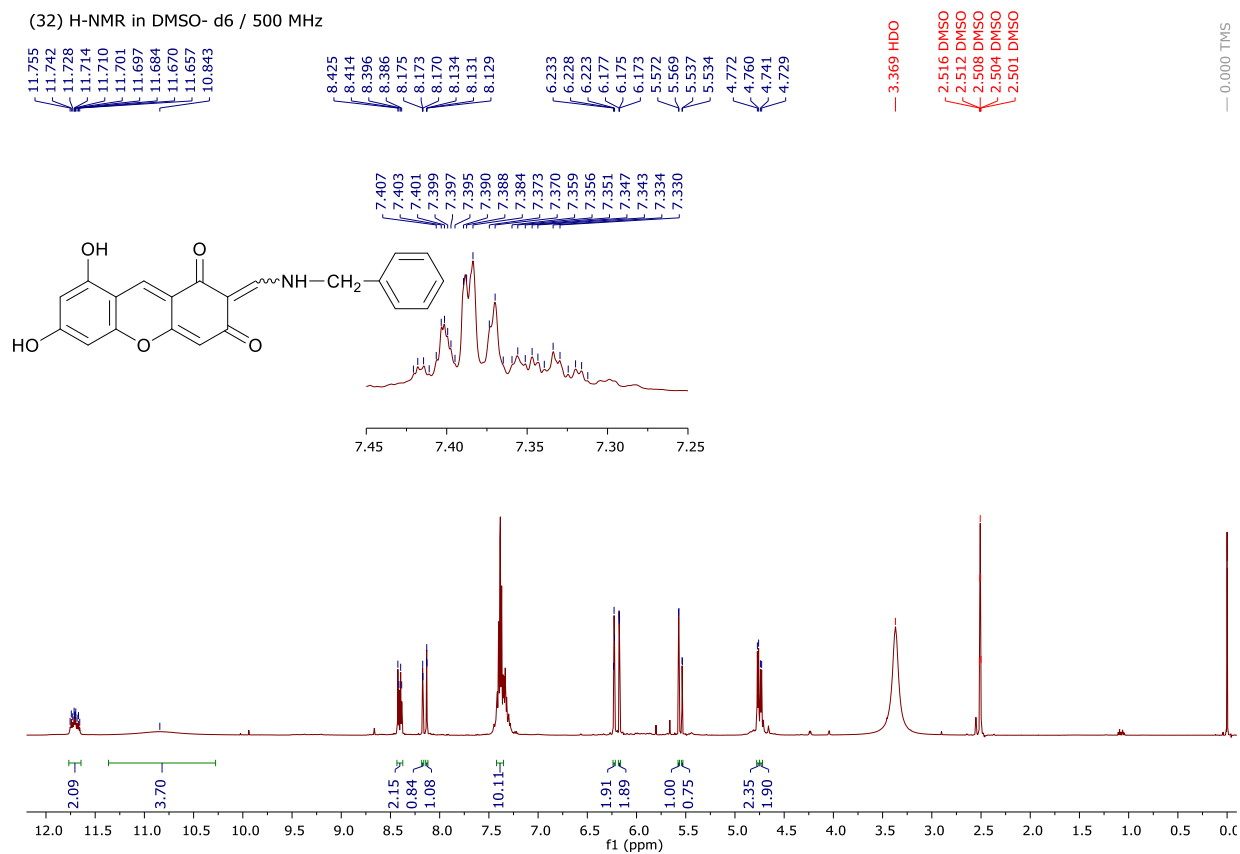

Figure S52. <sup>1</sup>H NMR spectrum of **32** in DMSO-*d*<sub>6</sub> / 500 MHz.

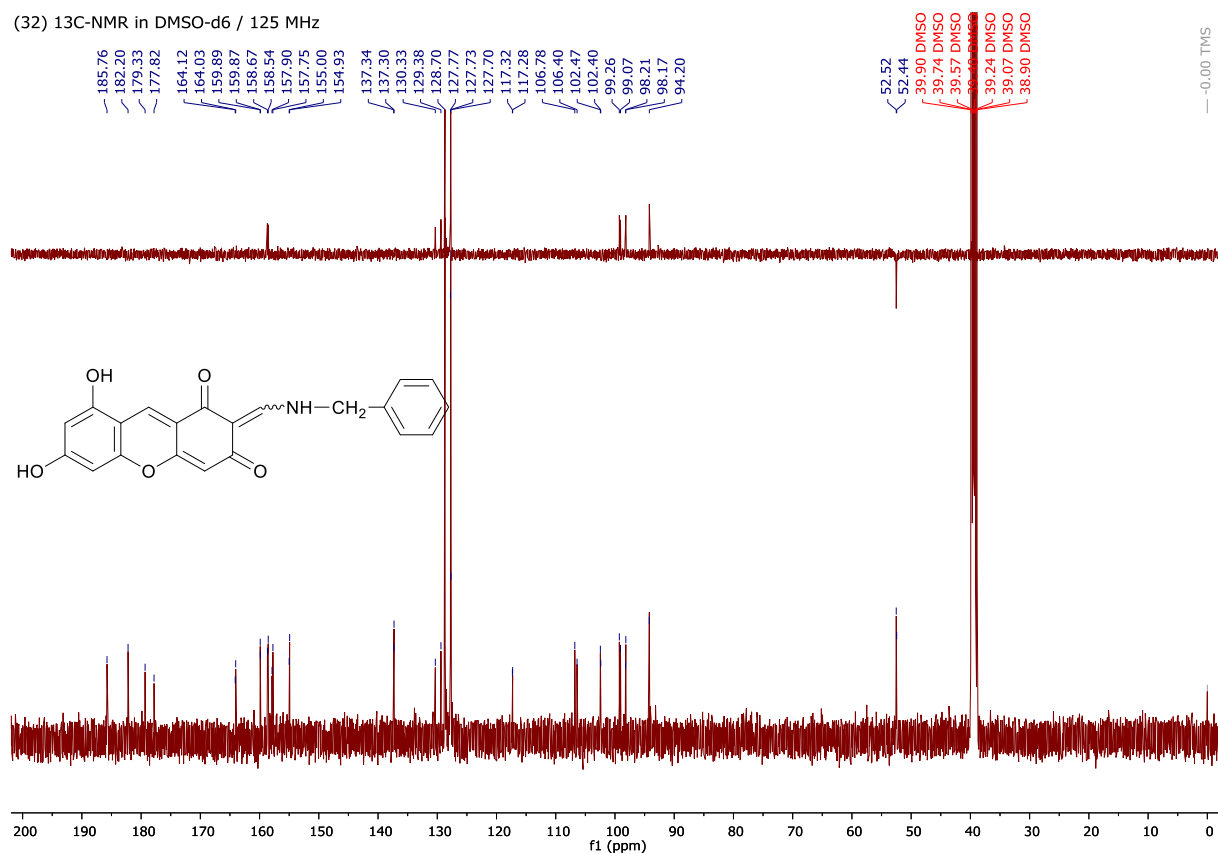

Figure S53. <sup>13</sup>C NMR and DEPT spectra of **32** in DMSO-*d*<sub>6</sub> / 125 MHz.

(33) H-RMN in DMSO-d6 / 500 MHz

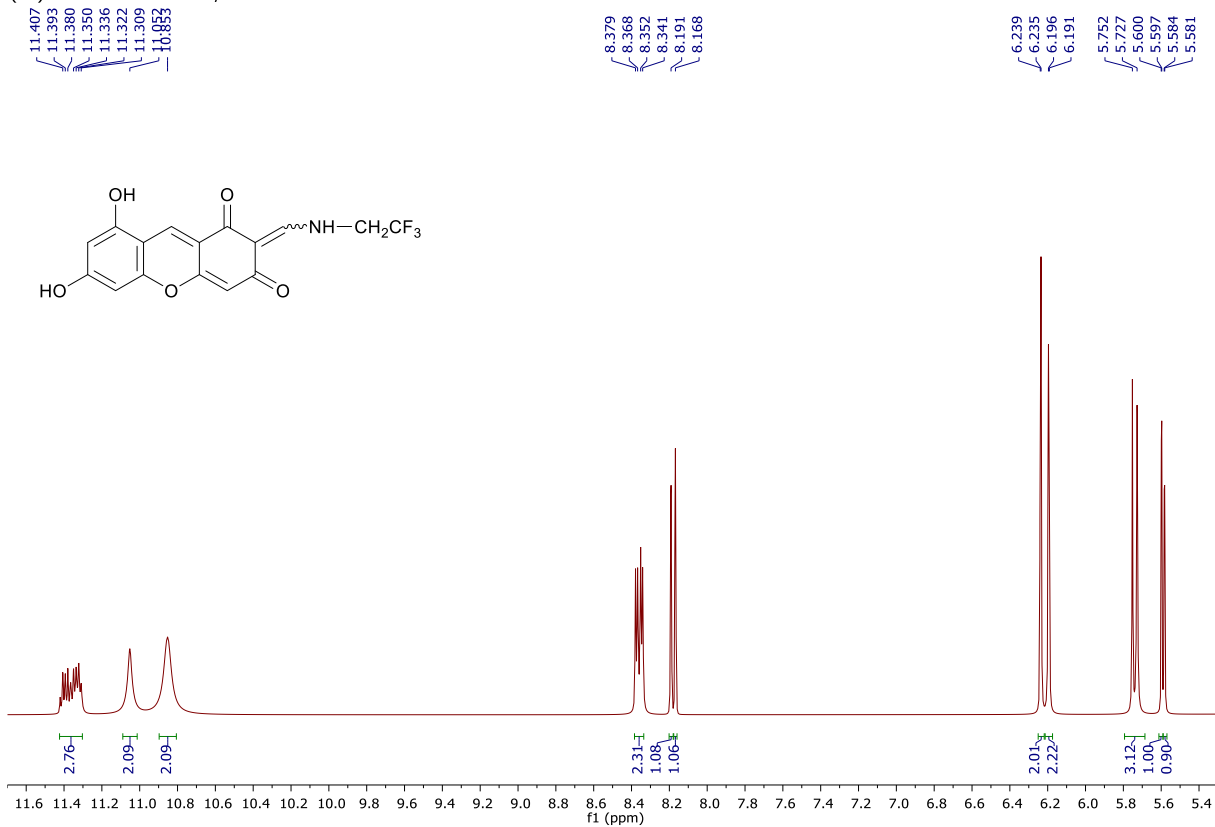

Figure S54. <sup>1</sup>H NMR spectrum of 33 in DMSO-d<sub>6</sub> / 500 MHz.

(51) H-RMN in DMSO-d6 / 500 MHz

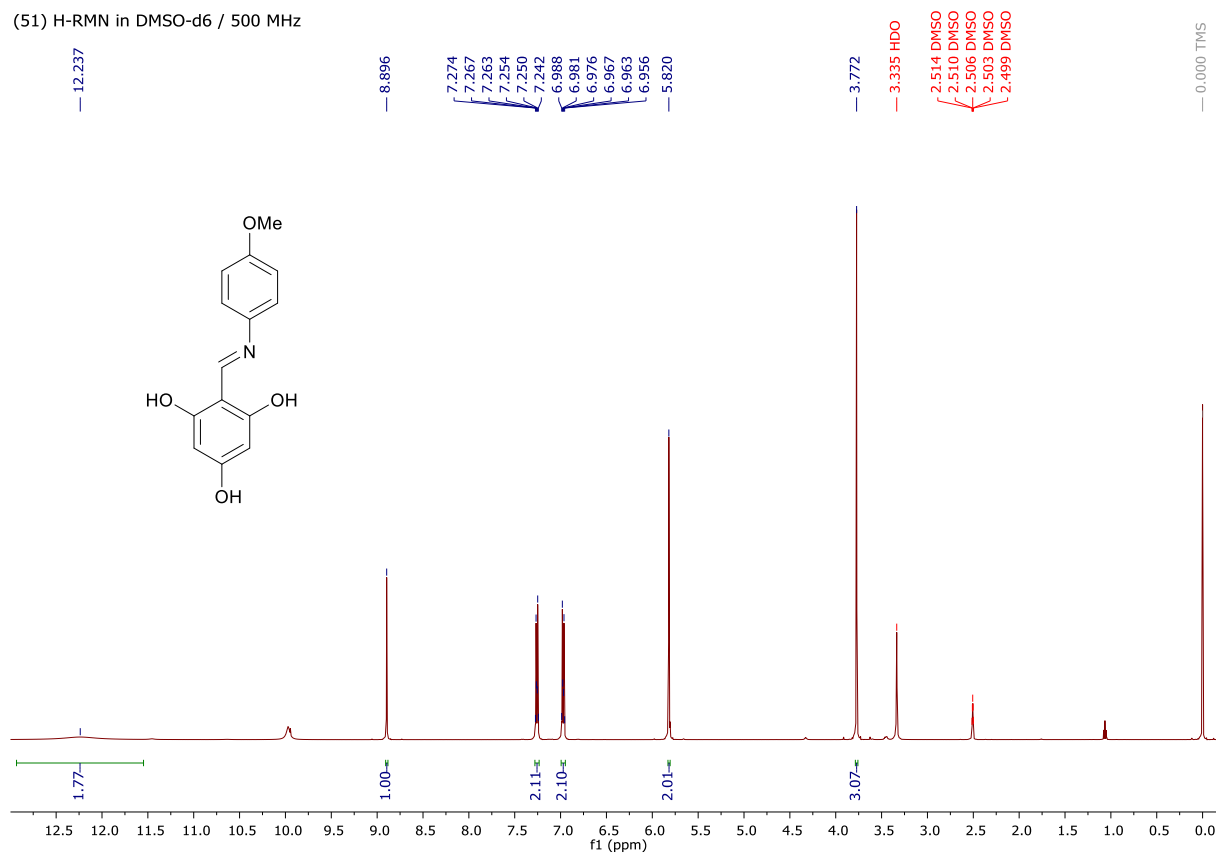

Figure S55. <sup>1</sup>H NMR spectrum of 51 in DMSO-d6 / 500 MHz.

(51) <sup>13</sup>C-NMR and DEPT in DMSO-d6 / 125 MHz

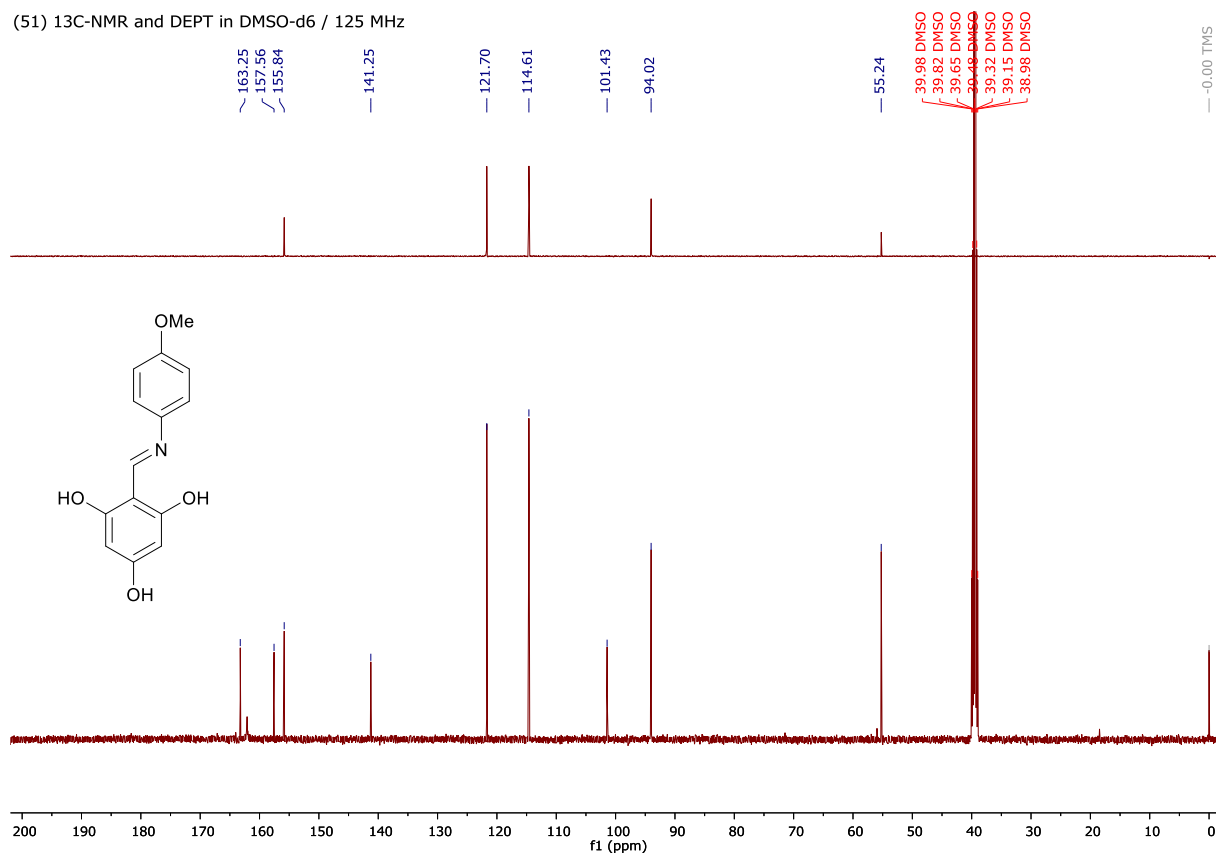

Figure S56. <sup>13</sup>C NMR and DEPT spectra of 51 in DMSO-d6 / 125 MHz.

**COSY, HSQC, HMBC SPECTRA AND VARIABLE-TEMPERATURE EXPERIMENTS**

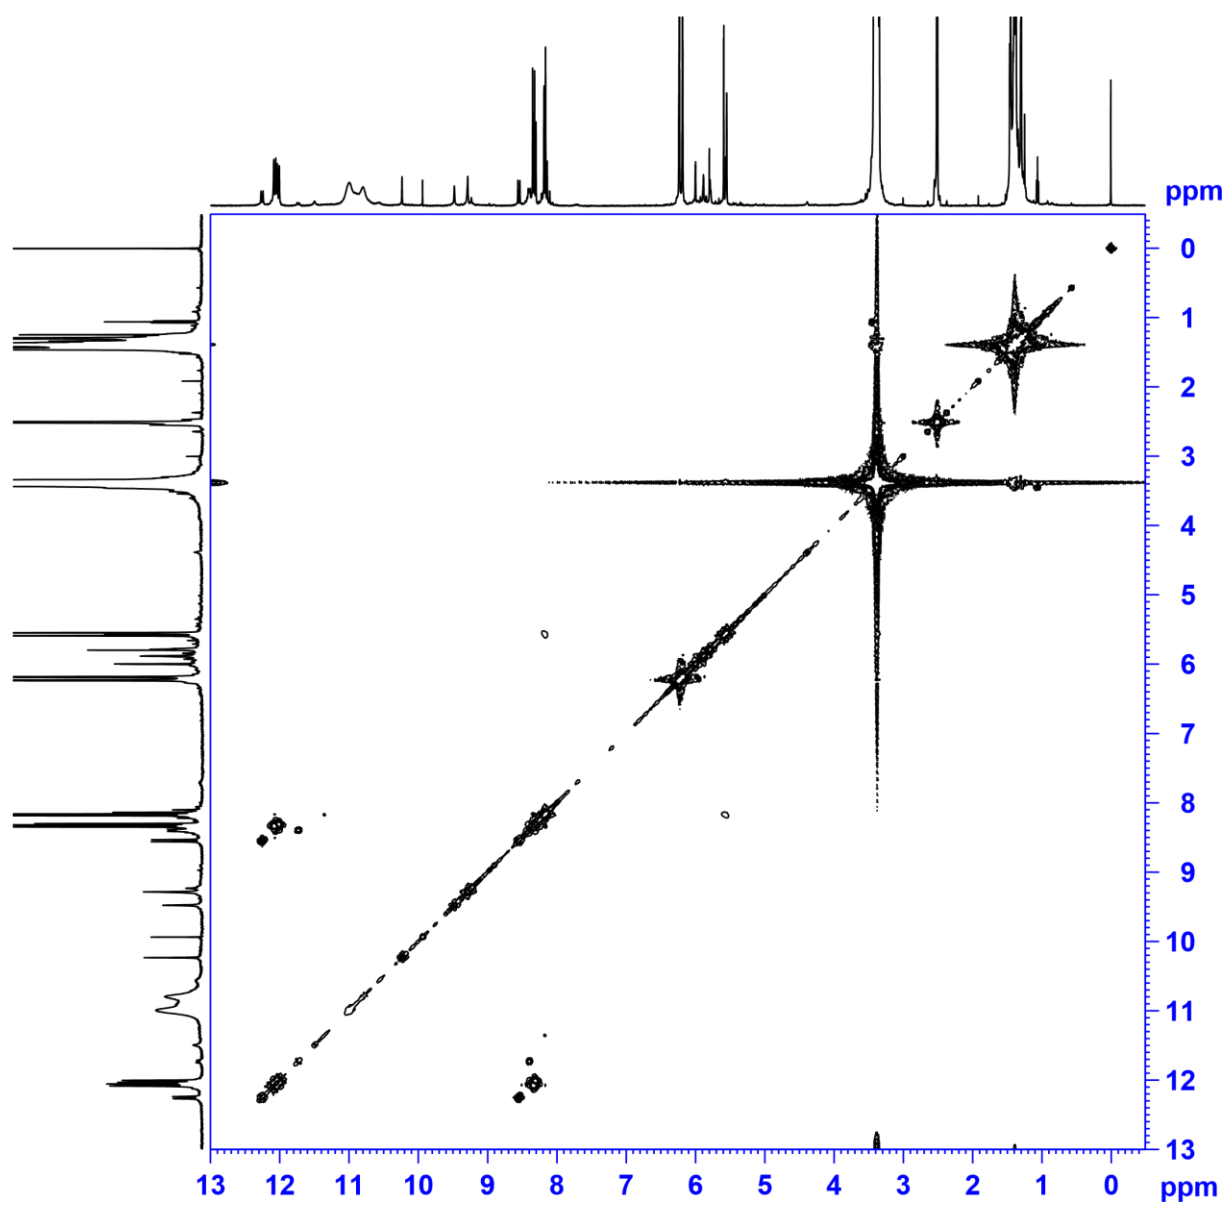

*Figure S57.* Compound 19 – COSY.

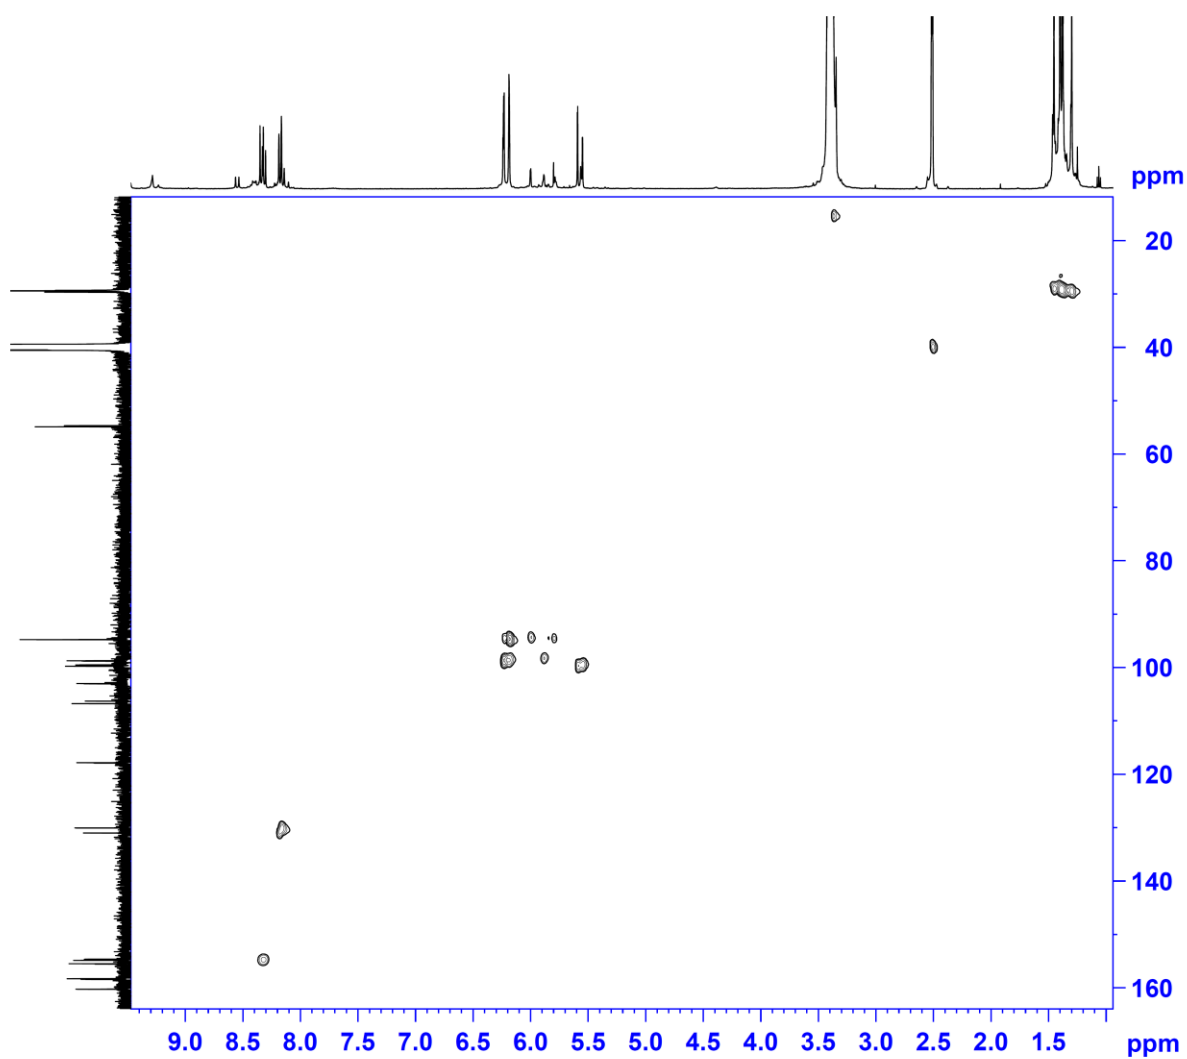

Figure S58. Compound 19 – HSQC.

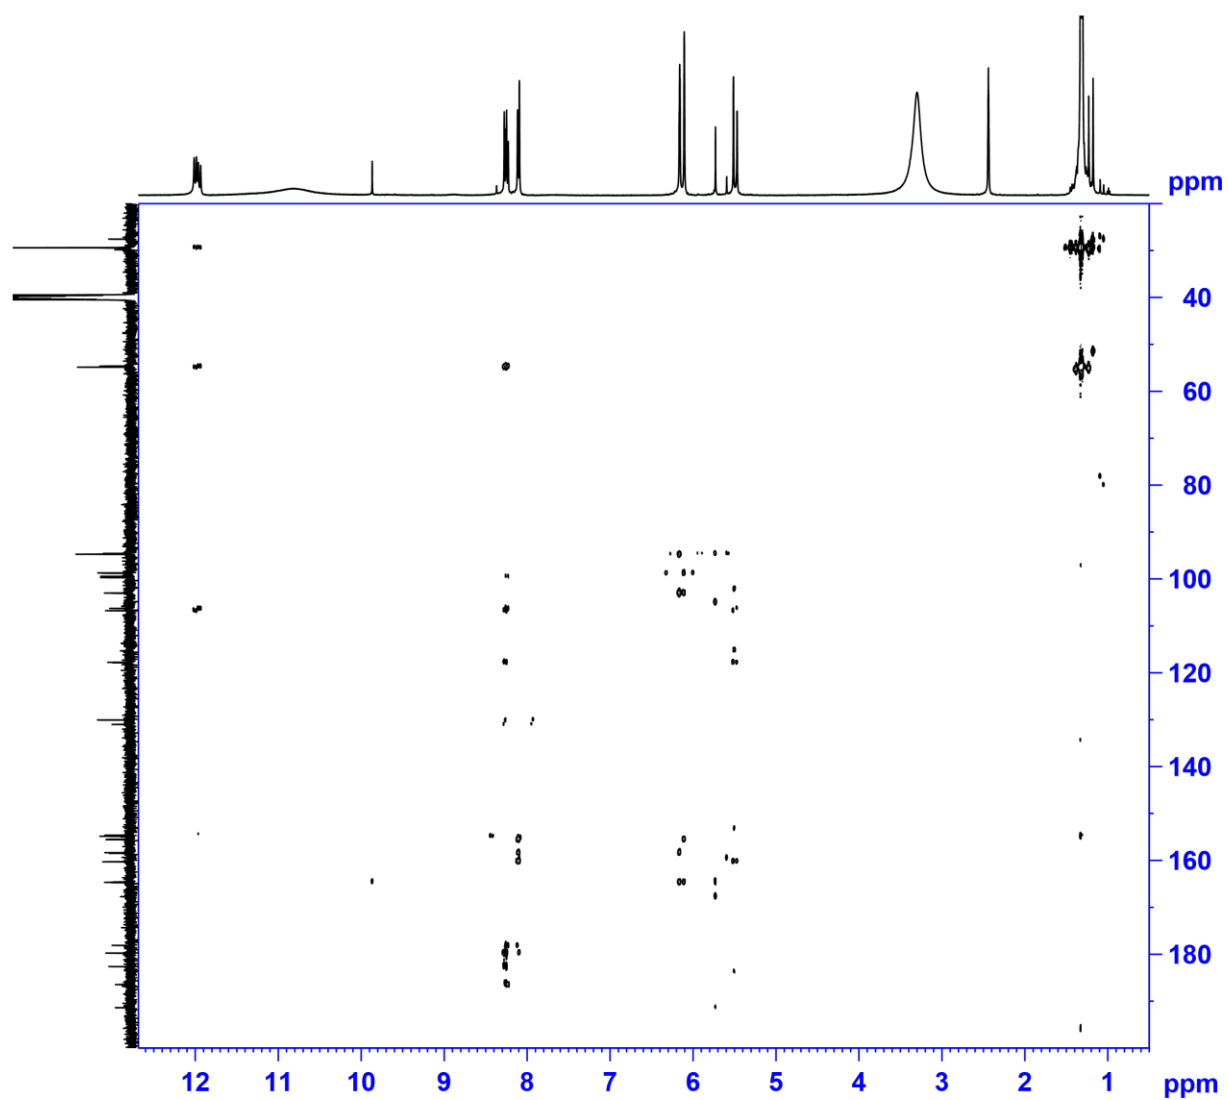

Figure S59. Compound 19 – HMBC.



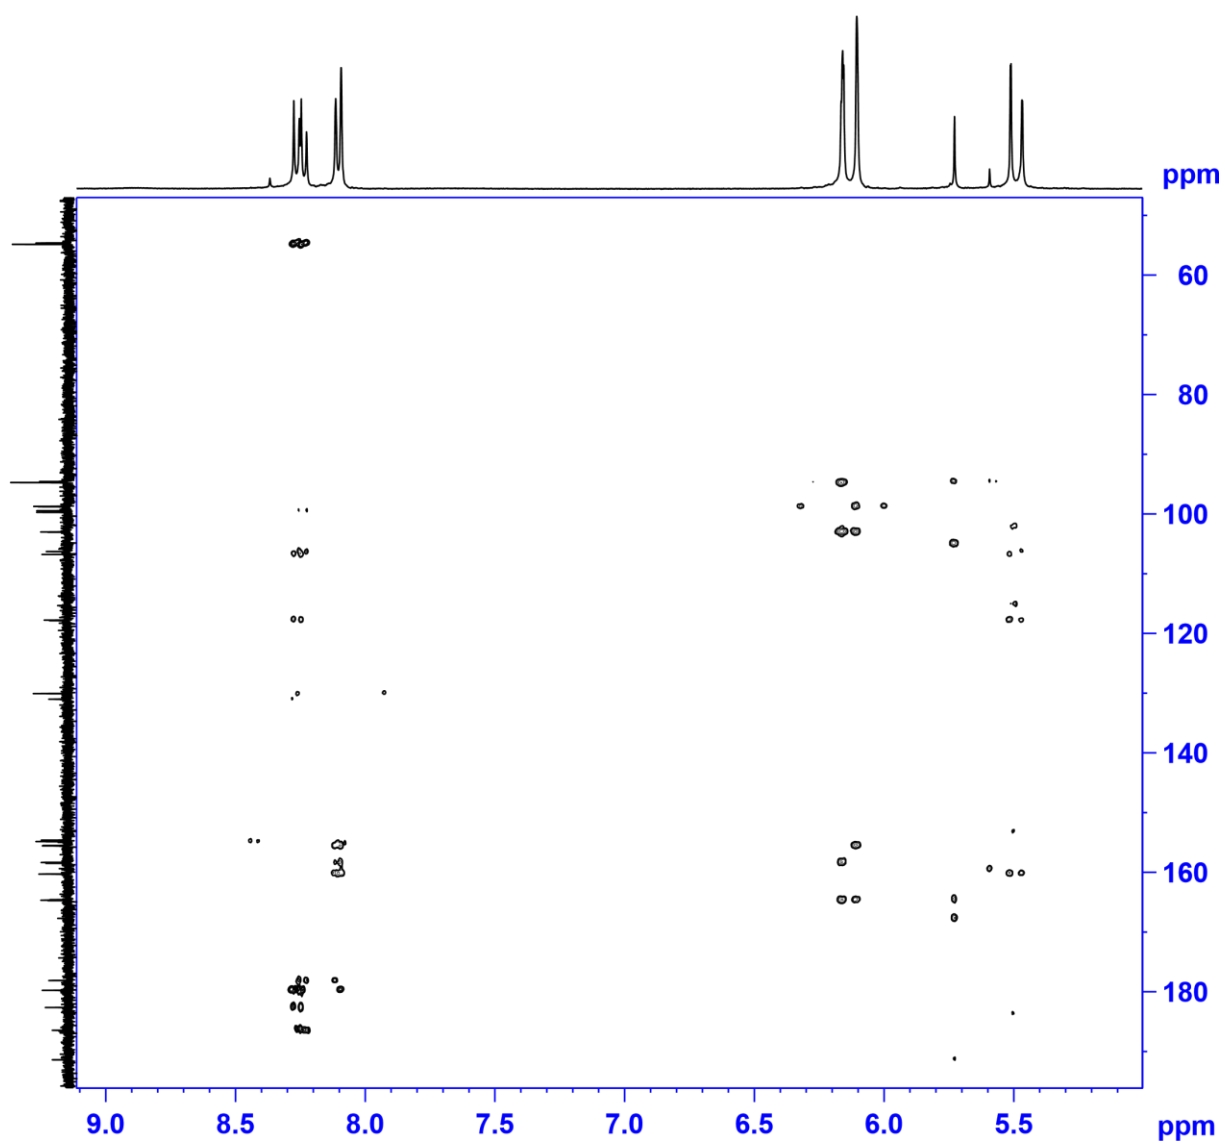

Figure S60. Compound 19 – HMBC (expanded/zoomed areas)

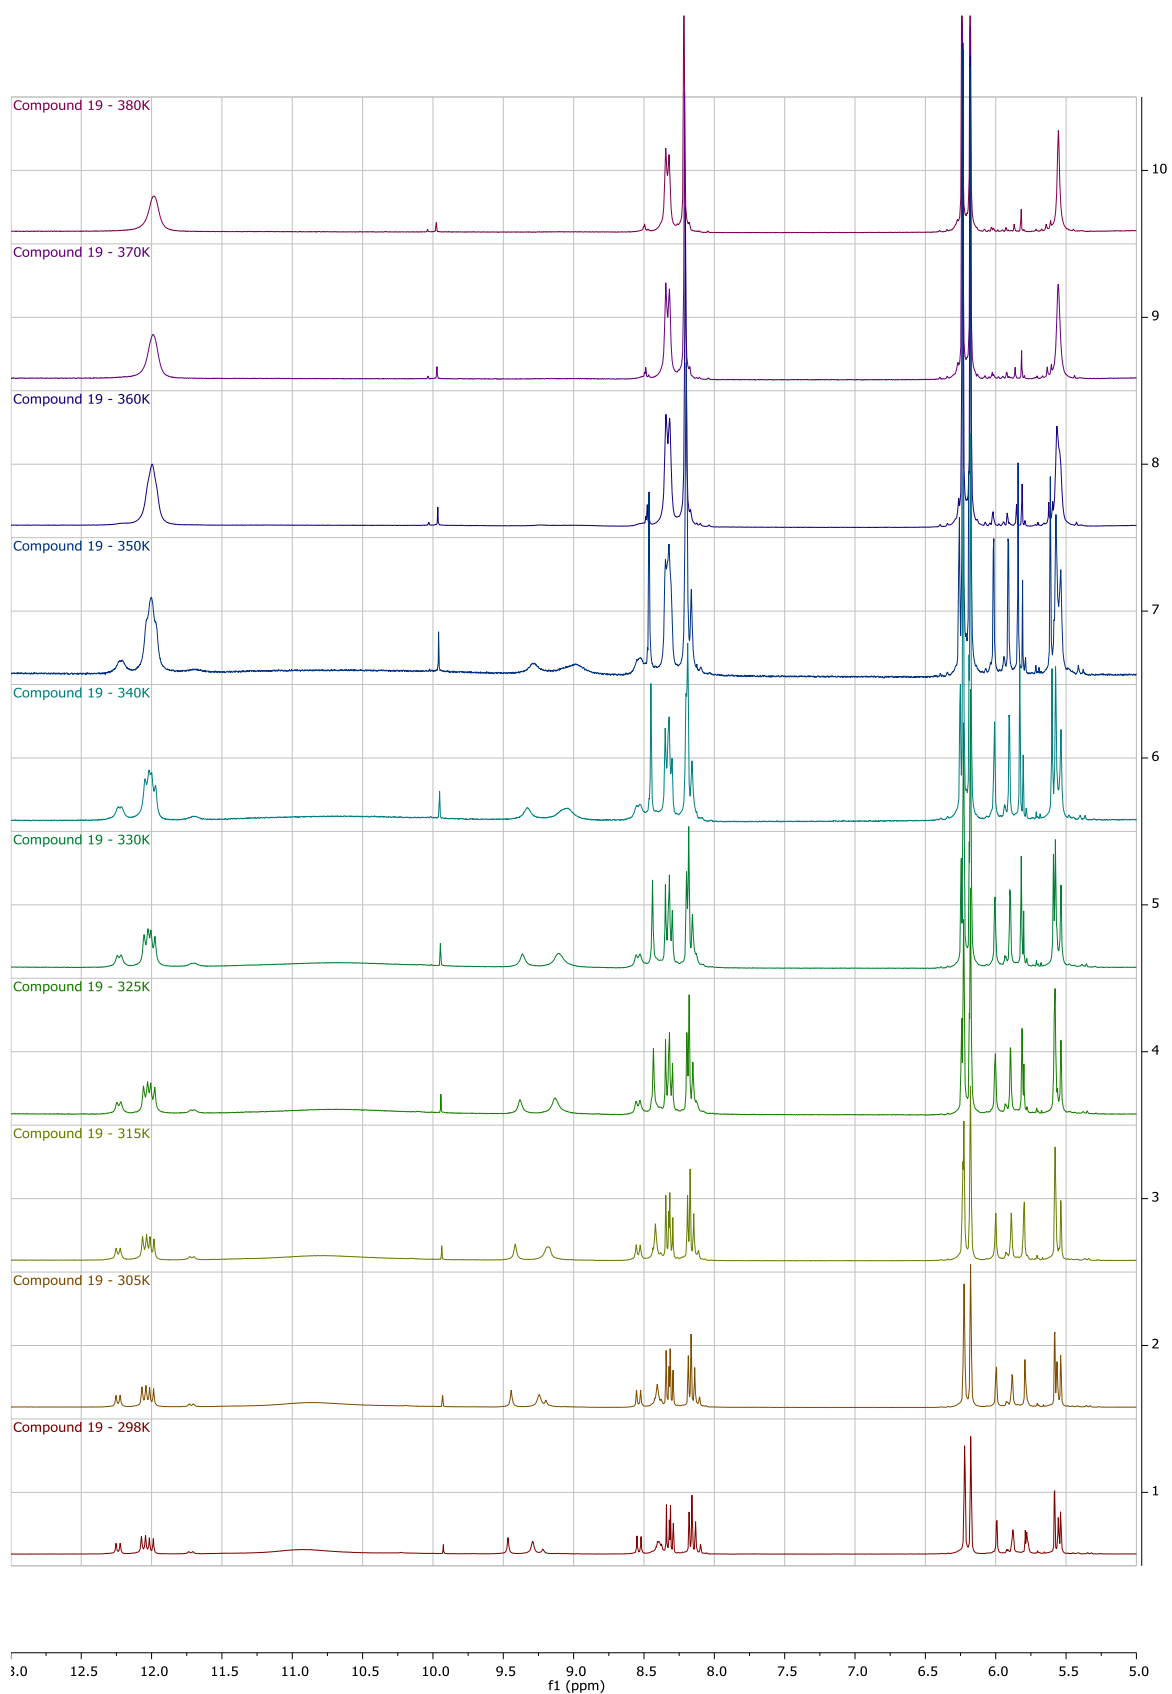

**Figure S61.** Compound 19. <sup>1</sup>H NMR variable-temperature experiments recorded between 13 and 5 ppm.

(19)  $^{13}\text{C}$ -NMR in DMSO- $d_6$  / 125 MHz / 380K

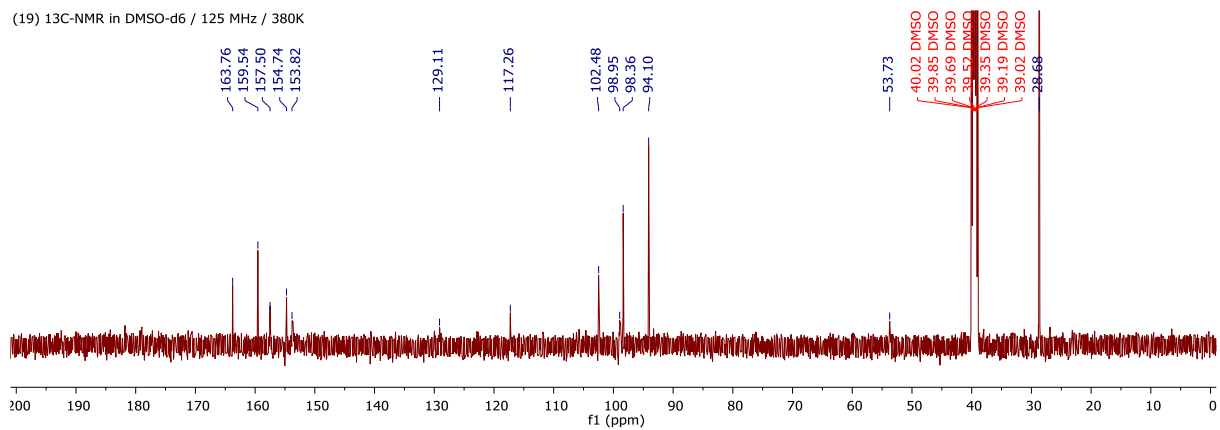

Figure S62.  $^{13}\text{C}$  NMR spectrum of **19** at 380 K.

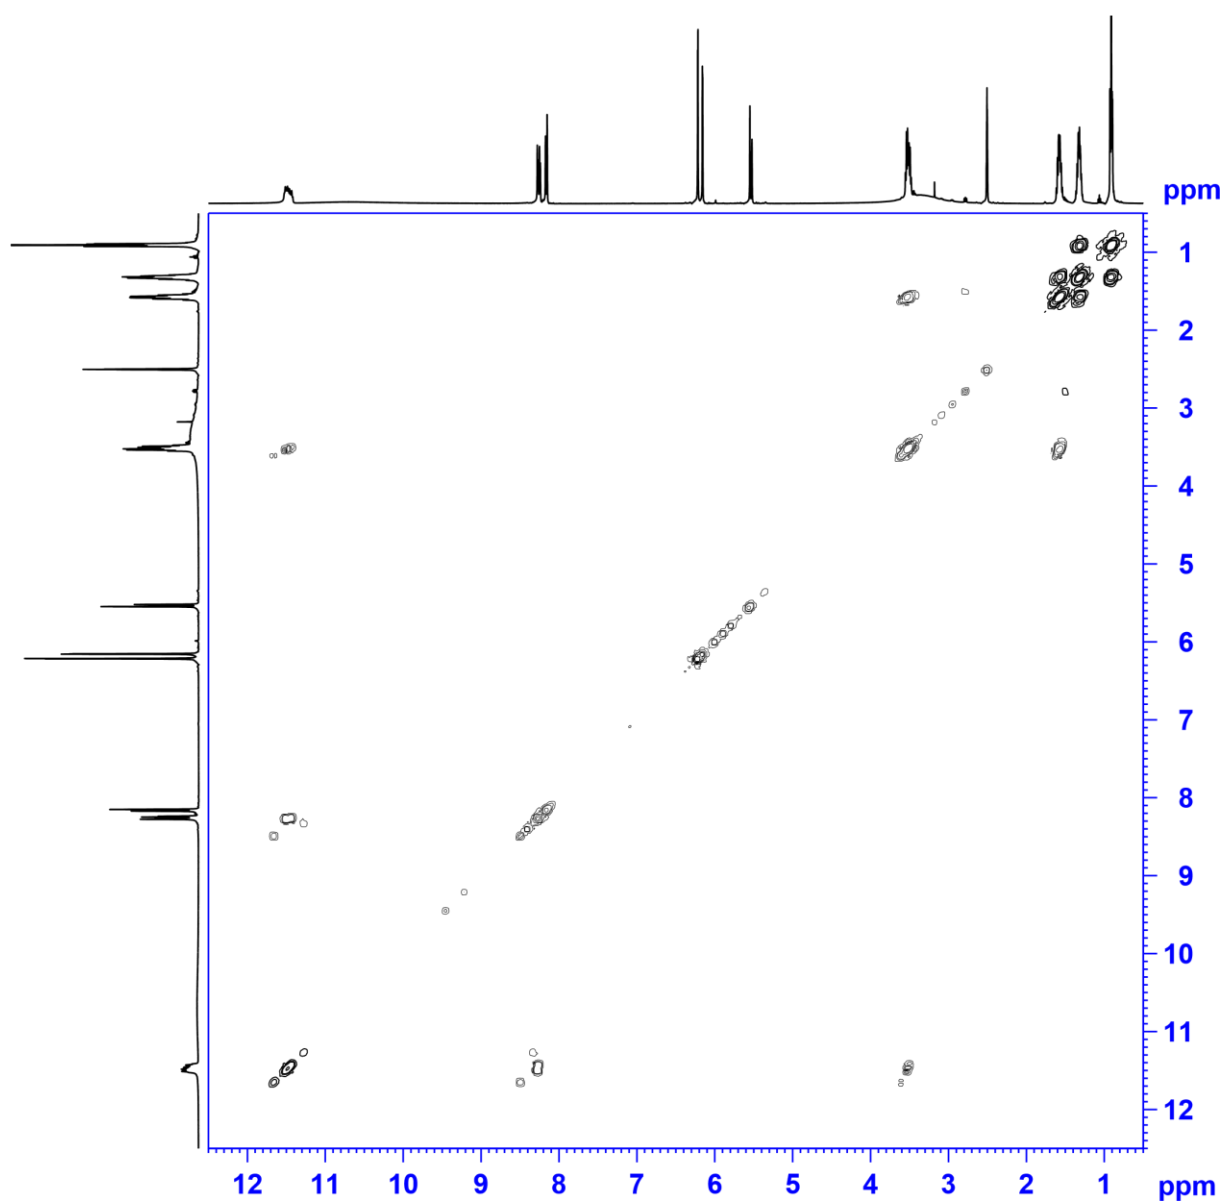

Figure S63. Compound **26** – COSY.

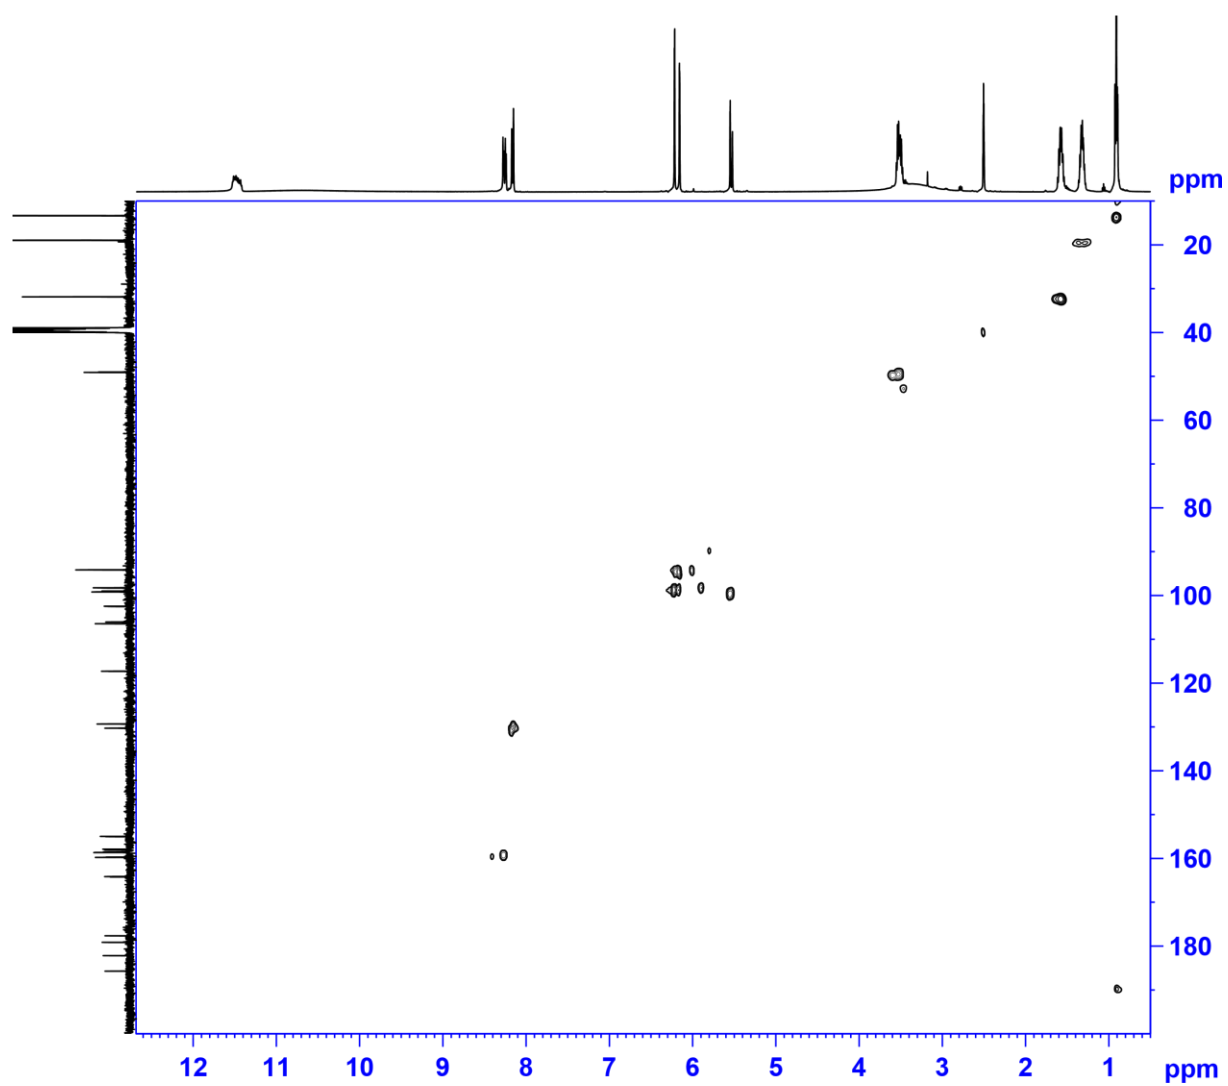

Figure S64. Compound 26 – HSQC.

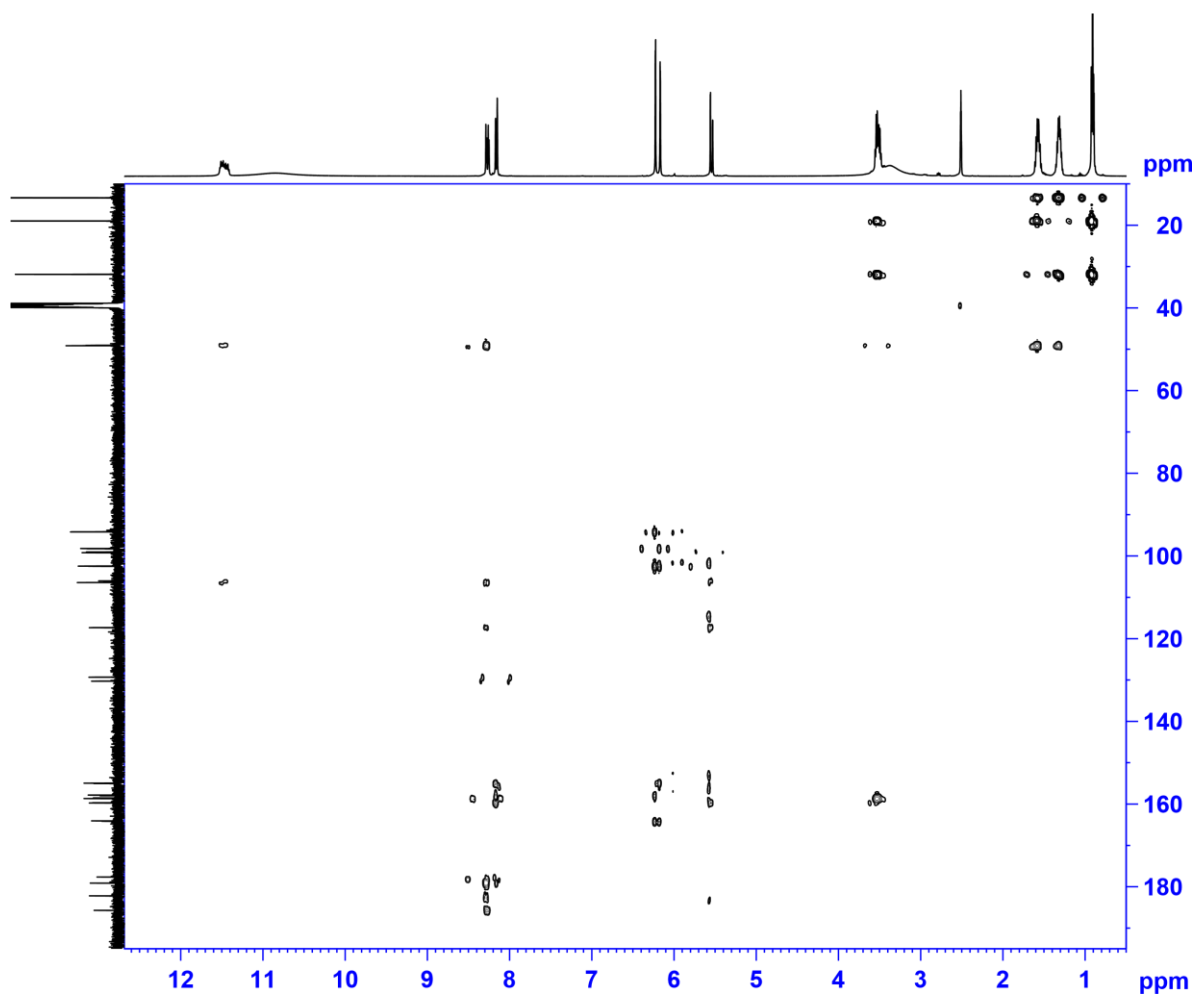

Figure S65. Compound 26 – HMBC.

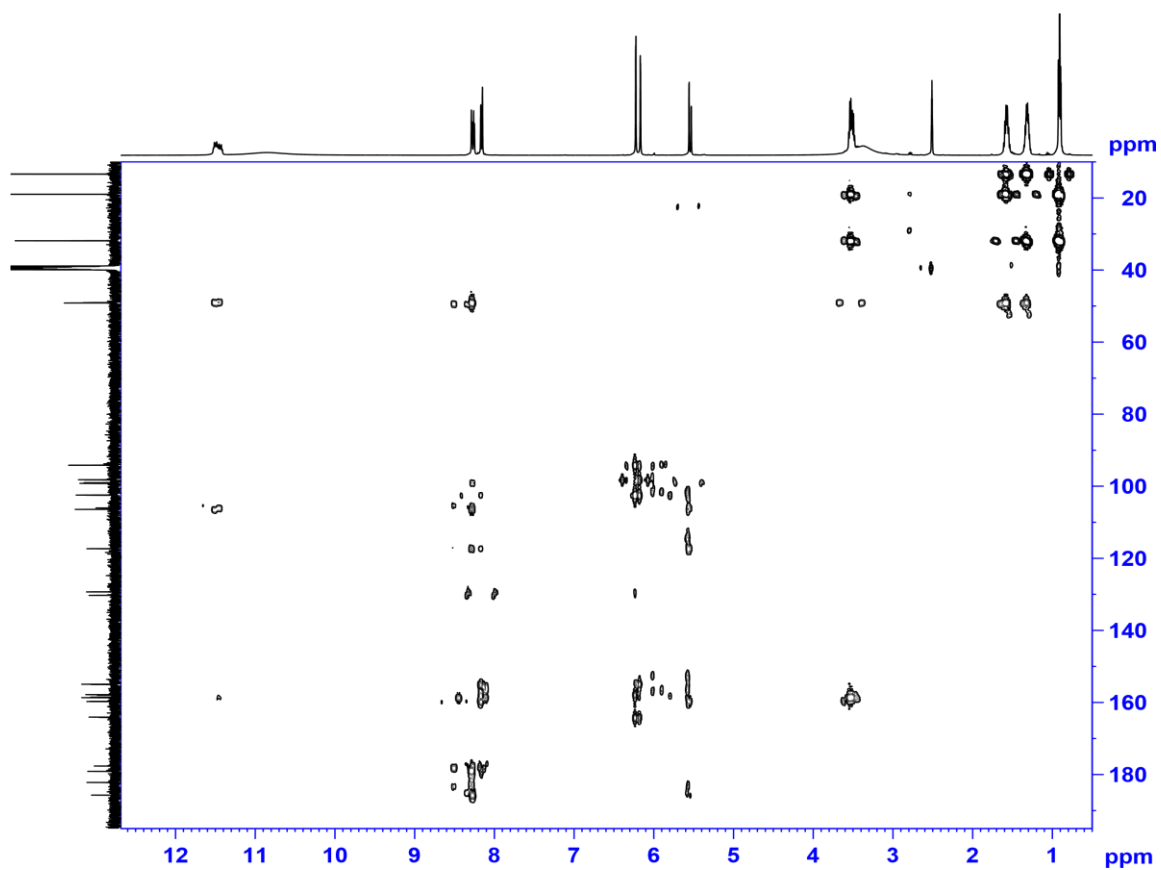

Figure S66. Compound 26 – HMBC (at higher magnification).

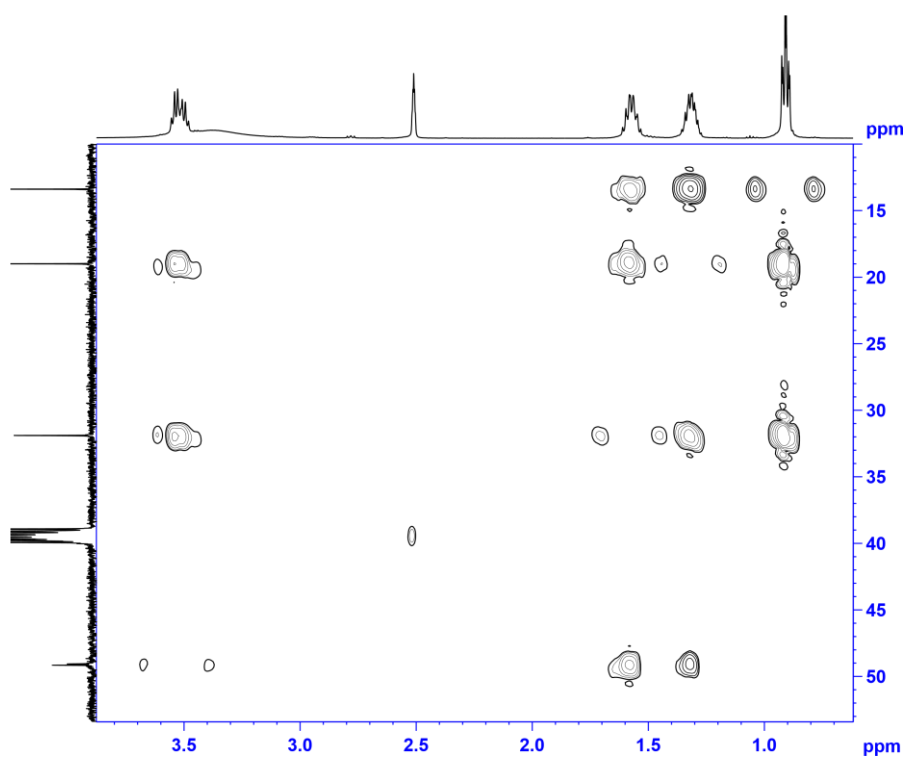

Figure S67. Compound 26 – HMBC (expanded/zoomed areas).

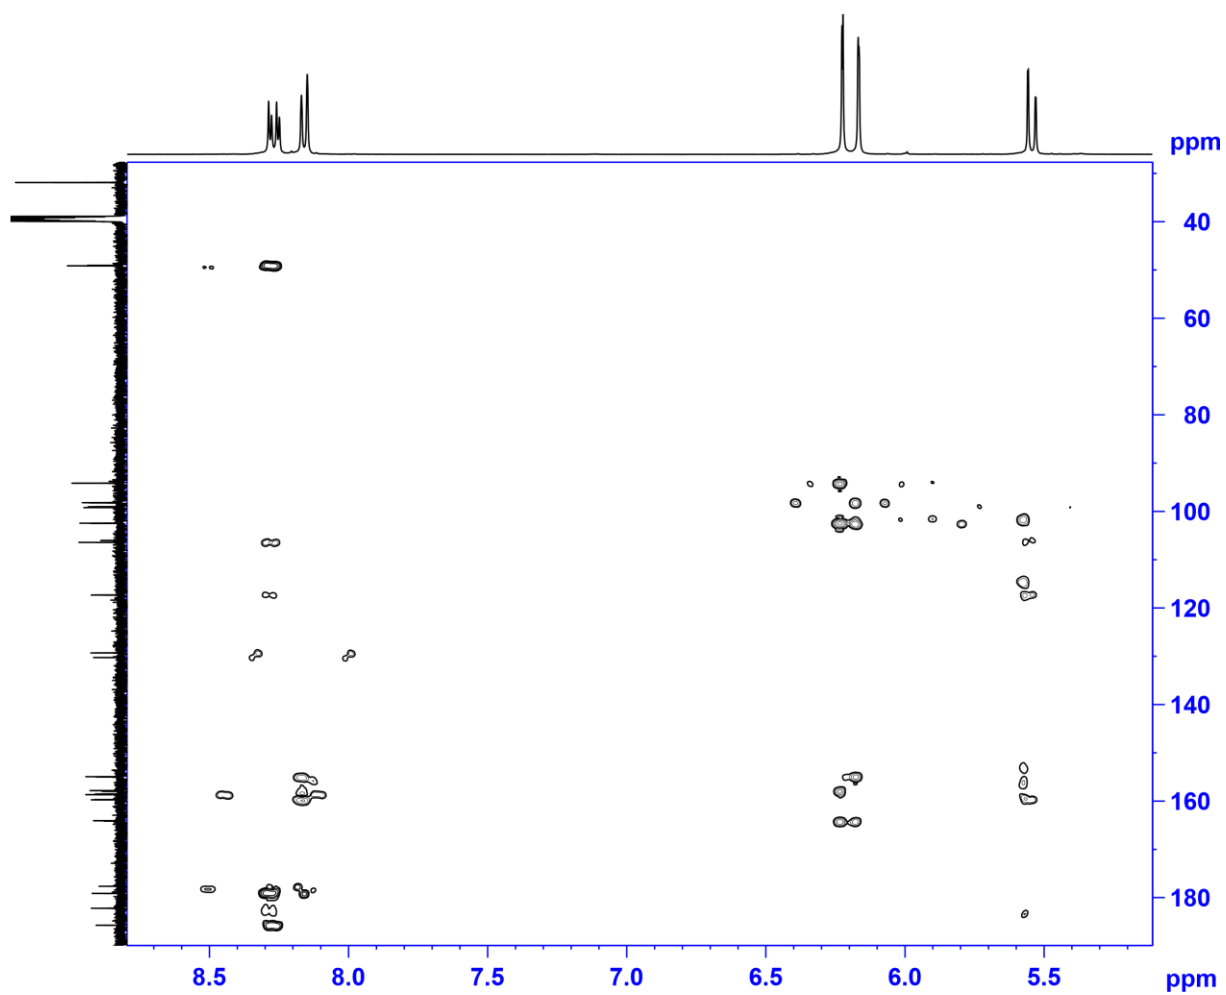

Figure S68. Compound 26 – HMBC (expanded/zoomed spectrum).

## CARTESIAN COORDINATES FOR OPTIMIZED STRUCTURES

### Compound 21 in DMSO:

| <u>ATOM TYPE</u> | <u>x</u>    | <u>y</u>    | <u>z</u>    |
|------------------|-------------|-------------|-------------|
| C                | -0.92484500 | -0.32546600 | -0.01397900 |
| C                | -1.82614900 | 0.79522700  | -0.00783700 |
| C                | -1.34948400 | 2.18676600  | -0.00211200 |
| C                | 0.09122300  | 2.40649500  | -0.00205100 |
| C                | 0.94966000  | 1.36381100  | -0.00492000 |
| C                | 0.52913300  | -0.01959800 | -0.00930900 |
| O                | 2.28590200  | 1.64103600  | -0.00377300 |
| C                | 3.22615500  | 0.66022300  | -0.00118700 |
| C                | 2.84838800  | -0.68961600 | -0.00221700 |
| C                | 1.45522800  | -1.00716000 | -0.00758300 |
| C                | 4.55006500  | 1.06582900  | 0.00259800  |
| C                | 5.53087600  | 0.07699800  | 0.00619800  |
| C                | 5.20647800  | -1.28369400 | 0.00622000  |
| C                | 3.87541200  | -1.65697200 | 0.00201900  |
| O                | 6.84395000  | 0.38294000  | 0.01018500  |
| O                | 3.48344600  | -2.94776300 | 0.00180200  |
| O                | -1.30227800 | -1.50704900 | -0.02131900 |
| C                | -3.21038800 | 0.59801000  | -0.00375400 |
| O                | -2.12755500 | 3.14515600  | 0.00204200  |
| N                | -3.82705100 | -0.55900900 | -0.01192800 |
| C                | -5.30055600 | -0.72846500 | 0.00662600  |
| C                | -5.55960600 | -2.23013300 | -0.05352600 |
| C                | -5.91196900 | -0.03578600 | -1.21122200 |
| C                | -5.86062000 | -0.14105900 | 1.30246300  |
| H                | 0.45590600  | 3.42582900  | 0.00110200  |
| H                | 1.13183500  | -2.04178900 | -0.01015400 |
| H                | 4.80415700  | 2.11923500  | 0.00308100  |
| H                | 5.99778800  | -2.02509000 | 0.00963400  |
| H                | 6.96231400  | 1.34242400  | 0.00978800  |
| H                | 4.25625800  | -3.52882000 | 0.00540700  |
| H                | -3.83749800 | 1.48599900  | 0.00900200  |
| H                | -3.23191500 | -1.38702300 | -0.01821700 |
| H                | -5.10191100 | -2.73772000 | 0.79993100  |
| H                | -6.63452100 | -2.41800200 | -0.03019300 |
| H                | -5.15521100 | -2.65673100 | -0.97543500 |
| H                | -5.73763800 | 1.04273300  | -1.18769400 |
| H                | -6.99143400 | -0.20330800 | -1.21895800 |
| H                | -5.48995300 | -0.43979300 | -2.13463300 |
| H                | -6.94150900 | -0.29586400 | 1.33618000  |
| H                | -5.41044400 | -0.62917800 | 2.17038600  |
| H                | -5.66858300 | 0.93314600  | 1.36420700  |

### Compound 22 in DMSO:

| <u>ATOM TYPE</u> | <u>x</u>    | <u>y</u>    | <u>z</u>    |
|------------------|-------------|-------------|-------------|
| C                | 0.72101200  | 0.89172400  | -0.00629600 |
| C                | 1.79198100  | -0.08861100 | -0.00917800 |
| C                | 1.53177100  | -1.52291800 | -0.01245000 |
| C                | 0.15019300  | -1.97705400 | -0.00803500 |
| C                | -0.86359900 | -1.08433900 | -0.00421500 |
| C                | -0.66684800 | 0.34833400  | -0.00513500 |
| O                | -2.13787200 | -1.57161400 | 0.00067000  |
| C                | -3.22297200 | -0.75479300 | 0.00170500  |
| C                | -3.06501300 | 0.63824500  | -0.00275000 |
| C                | -1.74022600 | 1.17371600  | -0.00538400 |
| C                | -4.46446000 | -1.36859600 | 0.00754200  |
| C                | -5.59097900 | -0.54941700 | 0.00857900  |
| C                | -5.48769300 | 0.84562400  | 0.00339600  |
| C                | -4.23432700 | 1.42860800  | -0.00241500 |
| O                | -6.83914800 | -1.05927300 | 0.01451200  |
| O                | -4.05591100 | 2.76555600  | -0.00783100 |
| O                | 0.90127300  | 2.10924500  | -0.00488500 |
| C                | 3.09871300  | 0.40948000  | -0.00453300 |



|   |             |             |             |
|---|-------------|-------------|-------------|
| O | 2.45938700  | -2.35218700 | -0.01785900 |
| N | 4.19861400  | -0.30360500 | -0.00830900 |
| C | 5.57263900  | 0.25241800  | 0.00771100  |
| C | 5.77513900  | 1.07014500  | 1.28363300  |
| C | 6.51572400  | -0.94638100 | -0.01119200 |
| C | 5.78909800  | 1.11954700  | -1.23279500 |
| H | -0.04202800 | -3.04255600 | -0.00795100 |
| H | -1.58720900 | 2.24685000  | -0.00703900 |
| H | -4.54501700 | -2.44938200 | 0.01112100  |
| H | -6.38718700 | 1.45046100  | 0.00394400  |
| H | -6.80352800 | -2.02549000 | 0.01786700  |
| H | -4.91232200 | 3.21417100  | -0.00676900 |
| H | 3.21676300  | 1.49037400  | 0.00410000  |
| H | 4.07060700  | -1.31575400 | -0.01441000 |
| H | 6.79890400  | 1.44996300  | 1.31594400  |
| H | 5.09501300  | 1.92491600  | 1.31760700  |
| H | 5.60420600  | 0.45006400  | 2.16692800  |
| H | 7.55099000  | -0.60109800 | 0.00087000  |
| H | 6.36163000  | -1.54539500 | -0.91263800 |
| H | 6.35273200  | -1.58034000 | 0.86446900  |
| H | 5.62819800  | 0.53523900  | -2.14197200 |
| H | 5.11142100  | 1.97679000  | -1.24171200 |
| H | 6.81376500  | 1.49820900  | -1.23819100 |

**Compound 49 in DMSO:**

| <u>ATOM TYPE</u> | <u>x</u>    | <u>y</u>    | <u>z</u>    |
|------------------|-------------|-------------|-------------|
| C                | -0.95778000 | -0.14790600 | 0.00019700  |
| C                | -1.82710400 | 0.92259800  | 0.00015100  |
| C                | -1.32943500 | 2.30530400  | 0.00007900  |
| C                | 0.11315800  | 2.49591200  | 0.00002100  |
| C                | 0.94429600  | 1.43093100  | 0.00004900  |
| C                | 0.47808700  | 0.06151600  | 0.00013800  |
| O                | 2.28713700  | 1.66197400  | 0.00001000  |
| C                | 3.19249100  | 0.65282300  | -0.00001600 |
| C                | 2.76998600  | -0.68608400 | 0.00004000  |
| C                | 1.37408100  | -0.96176000 | 0.00012600  |
| C                | 4.52884000  | 1.01453600  | -0.00008800 |
| C                | 5.47607100  | -0.00608800 | -0.00010900 |
| C                | 5.10770400  | -1.35721000 | -0.00005800 |
| C                | 3.76773500  | -1.68826300 | 0.00001100  |
| O                | 6.79694800  | 0.25426100  | -0.00018200 |
| O                | 3.33304400  | -2.96348100 | 0.00006000  |
| O                | -1.38186100 | -1.39639100 | 0.00026300  |
| C                | -3.26264700 | 0.68892600  | 0.00006200  |
| O                | -2.10392800 | 3.26601100  | 0.00004800  |
| N                | -3.72683600 | -0.50461200 | 0.00023600  |
| C                | -5.16850900 | -0.80131000 | -0.00008600 |
| C                | -6.05801800 | 0.43889600  | 0.00045700  |
| C                | -5.43875900 | -1.64087100 | 1.25194800  |
| C                | -5.43848400 | -1.63956700 | -1.25307200 |
| H                | 0.50219300  | 3.50619000  | -0.00004300 |
| H                | 1.02648000  | -1.98806400 | 0.00018700  |
| H                | 4.81689500  | 2.05928700  | -0.00012300 |
| H                | 5.87375300  | -2.12437200 | -0.00007500 |
| H                | 6.94945900  | 1.20917400  | -0.00021800 |
| H                | 4.08486800  | -3.57170600 | 0.00004100  |
| H                | -2.41513200 | -1.33823300 | 0.00025500  |
| H                | -3.89923200 | 1.57312500  | -0.00013400 |
| H                | -5.89110900 | 1.05394000  | -0.88789600 |
| H                | -7.10351300 | 0.12309500  | 0.00046200  |
| H                | -5.89085800 | 1.05327500  | 0.88922900  |
| H                | -4.80697400 | -2.53290700 | 1.25973000  |
| H                | -6.48490100 | -1.95694200 | 1.27273200  |
| H                | -5.23211100 | -1.06095900 | 2.15545400  |
| H                | -5.23166900 | -1.05869500 | -2.15592000 |
| H                | -4.80667900 | -2.53158100 | -1.26165700 |
| H                | -6.48461800 | -1.95563200 | -1.27435900 |

**Compound 50 in DMSO:**

| <u>ATOM TYPE</u> | <u>x</u>    | <u>y</u>    | <u>z</u>    |
|------------------|-------------|-------------|-------------|
| C                | -0.69391100 | 0.99624100  | 0.00015400  |
| C                | -1.78436300 | 0.04952500  | 0.00024700  |
| C                | -1.53426500 | -1.33172300 | 0.00031900  |
| C                | -0.21784000 | -1.88040600 | 0.00024600  |
| C                | 0.83414000  | -1.02069300 | 0.00010700  |
| C                | 0.67331800  | 0.40883400  | 0.00010700  |
| O                | 2.08485000  | -1.55026600 | 0.00005200  |
| C                | 3.19415100  | -0.77160900 | 0.00000100  |
| C                | 3.07838000  | 0.62797200  | 0.00011300  |
| C                | 1.77891100  | 1.20183400  | 0.00014400  |
| C                | 4.41551500  | -1.42325700 | -0.00019000 |
| C                | 5.56515100  | -0.63732700 | -0.00026000 |
| C                | 5.50575400  | 0.76248300  | -0.00010100 |
| C                | 4.27445300  | 1.38457400  | 0.00008800  |
| O                | 6.79612900  | -1.18151500 | -0.00047000 |
| O                | 4.13400300  | 2.72368200  | 0.00026100  |
| O                | -0.84621500 | 2.22030900  | 0.00006100  |
| C                | -3.14750400 | 0.54153100  | 0.00025500  |
| O                | -2.53390800 | -2.18774000 | 0.00057700  |
| N                | -4.14219700 | -0.26783400 | 0.00053300  |
| C                | -5.54337200 | 0.17975100  | -0.00020900 |
| C                | -6.19039300 | -0.41821900 | -1.25310500 |
| C                | -6.19193500 | -0.41902400 | 1.25146600  |
| C                | -5.71261100 | 1.69635600  | 0.00019000  |
| H                | -0.07914500 | -2.95324200 | 0.00031200  |
| H                | 1.65839200  | 2.27970700  | 0.00017900  |
| H                | 4.46162900  | -2.50597000 | -0.00029700 |
| H                | 6.42482200  | 1.33742600  | -0.00014400 |
| H                | 6.73461900  | -2.14672700 | -0.00064100 |
| H                | 5.00224300  | 3.14940700  | 0.00001300  |
| H                | -3.27004600 | 1.62481200  | -0.00021200 |
| H                | -3.40305200 | -1.62069200 | 0.00058200  |
| H                | -7.25982300 | -0.19300500 | -1.26940900 |
| H                | -5.73377800 | -0.00399100 | -2.15601300 |
| H                | -6.06333700 | -1.50379200 | -1.26708300 |
| H                | -7.26144300 | -0.19411000 | 1.26645100  |
| H                | -5.73668400 | -0.00517600 | 2.15524400  |
| H                | -6.06457000 | -1.50456600 | 1.26504100  |
| H                | -5.26793600 | 2.15295100  | -0.88828500 |
| H                | -6.77917900 | 1.93263600  | 0.00036800  |
| H                | -5.26769800 | 2.15234200  | 0.88887300  |

**Transition state for 21 to 49 tautomerization in DMSO:**

| <u>ATOM TYPE</u> | <u>x</u>    | <u>y</u>    | <u>z</u>    |
|------------------|-------------|-------------|-------------|
| C                | -0.98273300 | -0.11943500 | 0.00220200  |
| C                | -1.83386600 | 0.98103500  | 0.00495900  |
| C                | -1.32315400 | 2.35400000  | 0.00477700  |
| C                | 0.12368700  | 2.52409800  | 0.00114000  |
| C                | 0.94058700  | 1.44809700  | -0.00039100 |
| C                | 0.46043600  | 0.08250600  | 0.00111500  |
| O                | 2.28688700  | 1.66397900  | -0.00390000 |
| C                | 3.18100700  | 0.64448200  | -0.00264500 |
| C                | 2.74468600  | -0.68954900 | 0.00122200  |
| C                | 1.34421500  | -0.94924900 | 0.00222800  |
| C                | 4.52120600  | 0.99254400  | -0.00539400 |
| C                | 5.45834700  | -0.03735700 | -0.00343700 |
| C                | 5.07569100  | -1.38411700 | 0.00149400  |
| C                | 3.73181500  | -1.70121600 | 0.00367200  |
| O                | 6.78231200  | 0.20964800  | -0.00604300 |
| O                | 3.28493200  | -2.97253500 | 0.00824900  |
| O                | -1.44046600 | -1.33541500 | 0.00076800  |
| C                | -3.25704100 | 0.74456000  | 0.00611400  |
| O                | -2.08334600 | 3.32677400  | 0.00701100  |

|   |             |             |             |
|---|-------------|-------------|-------------|
| N | -3.69537200 | -0.46517000 | 0.00254600  |
| C | -5.11769800 | -0.84218500 | -0.00279500 |
| C | -5.34010900 | -1.72903500 | 1.22504200  |
| C | -5.35129600 | -1.65321700 | -1.28042000 |
| C | -6.05462200 | 0.35999700  | 0.03796900  |
| H | 0.52686000  | 3.52893200  | -0.00023400 |
| H | 0.98191800  | -1.97063500 | 0.00394500  |
| H | 4.81902700  | 2.03453600  | -0.00867200 |
| H | 5.83291600  | -2.15994600 | 0.00367000  |
| H | 6.94415700  | 1.16296600  | -0.00917800 |
| H | 4.03108700  | -3.58757300 | 0.00979000  |
| H | -3.91939100 | 1.60826300  | 0.00954200  |
| H | -2.58086400 | -1.20101100 | 0.00047000  |
| H | -5.15845500 | -1.16591800 | 2.14420300  |
| H | -6.36917400 | -2.09643500 | 1.23911600  |
| H | -4.66544100 | -2.58890800 | 1.20485400  |
| H | -5.18259900 | -1.03314200 | -2.16472600 |
| H | -6.37915100 | -2.02359500 | -1.30490100 |
| H | -4.67323600 | -2.50964200 | -1.32123300 |
| H | -7.08648200 | 0.00275800  | 0.03748300  |
| H | -5.90275400 | 0.95500000  | 0.94252100  |
| H | -5.92031700 | 1.00516500  | -0.83427300 |

**Transition state for 22 to 50 tautomerization in DMSO:**

| <u>ATOM TYPE</u> | <u>x</u>    | <u>y</u>    | <u>z</u>    |
|------------------|-------------|-------------|-------------|
| C                | 0.68196900  | 1.04446300  | 0.00002900  |
| C                | 1.78014400  | 0.11153300  | 0.00000500  |
| C                | 1.56268000  | -1.28767000 | 0.00002400  |
| C                | 0.24347800  | -1.84501200 | -0.00000300 |
| C                | -0.81662600 | -0.99739300 | 0.00000400  |
| C                | -0.67780000 | 0.43702200  | 0.00001300  |
| O                | -2.06212300 | -1.54261700 | 0.00001000  |
| C                | -3.18209700 | -0.77833900 | -0.00000200 |
| C                | -3.08603300 | 0.62183200  | -0.00000100 |
| C                | -1.79260300 | 1.21384800  | 0.00000700  |
| C                | -4.39442500 | -1.44708400 | -0.00001100 |
| C                | -5.55531600 | -0.67776400 | -0.00001700 |
| C                | -5.51508800 | 0.72230800  | -0.00001400 |
| C                | -4.29164300 | 1.36112100  | -0.00000700 |
| O                | -6.77905900 | -1.23986200 | -0.00002800 |
| O                | -4.17008700 | 2.70263400  | -0.00000100 |
| O                | 0.81658100  | 2.27069800  | 0.00006800  |
| C                | 3.13304100  | 0.59902200  | -0.00003400 |
| O                | 2.57560000  | -2.09898400 | 0.00006400  |
| N                | 4.11455500  | -0.23536300 | 0.00002300  |
| C                | 5.53652700  | 0.13900700  | -0.00002200 |
| C                | 5.75783500  | 1.64758000  | -0.00004200 |
| C                | 6.15669000  | -0.48487700 | 1.25332200  |
| C                | 6.15664800  | -0.48491000 | -1.25336800 |
| H                | 0.11308200  | -2.91903100 | 0.00000100  |
| H                | -1.68679600 | 2.29319500  | 0.00001100  |
| H                | -4.42431700 | -2.53035300 | -0.00001000 |
| H                | -6.44169700 | 1.28505800  | -0.00001500 |
| H                | -6.70300000 | -2.20394400 | -0.00001300 |
| H                | -5.04434400 | 3.11569500  | -0.00000700 |
| H                | 3.28612100  | 1.67714800  | -0.00010800 |
| H                | 3.50284600  | -1.41694700 | 0.00007400  |
| H                | 6.83187200  | 1.84567700  | -0.00002100 |
| H                | 5.32870500  | 2.11781100  | -0.88893300 |
| H                | 5.32867500  | 2.11783800  | 0.88882000  |
| H                | 7.23358300  | -0.29995100 | 1.27016700  |
| H                | 5.98937600  | -1.56503200 | 1.26602600  |
| H                | 5.71481700  | -0.05379100 | 2.15545500  |
| H                | 5.98909000  | -1.56502600 | -1.26618600 |
| H                | 5.71494400  | -0.05365700 | -2.15550400 |
| H                | 7.23358300  | -0.30022200 | -1.27011600 |
